# Supplementary material for: Coping in the role as next of kin of a person with a brain tumour: a qualitative metasynthesis
Source: PubMed Central journal article supplement — BMJ Open. 2022 Sep 5;12(9):e052872. doi: 10.1136/bmjopen-2021-052872 (PMC9445781; doi:10.1136/bmjopen-2021-052872), 2022-09-05
Supplement: bmjopen-2021-052872.draft_revisions.pdf [file bmjopen-2021-052872.draft_revisions.pdf]

# BMJ Open

BMJ Open is committed to open peer review. As part of this commitment we make the peer review history of every article we publish publicly available.

When an article is published we post the peer reviewers' comments and the authors' responses online. We also post the versions of the paper that were used during peer review. These are the versions that the peer review comments apply to.

The versions of the paper that follow are the versions that were submitted during the peer review process. They are not the versions of record or the final published versions. They should not be cited or distributed as the published version of this manuscript.

BMJ Open is an open access journal and the full, final, typeset and author-corrected version of record of the manuscript is available on our site with no access controls, subscription charges or pay-per-view fees (<http://bmjopen.bmj.com>).

If you have any questions on BMJ Open's open peer review process please email [info.bmjopen@bmj.com](mailto:info.bmjopen@bmj.com)

# BMJ Open

## Being the next of kin of a person with a brain tumor: a metasynthesis focusing on coping factors and strategies

|                               |                                                                                                                                                                                                                       |
|-------------------------------|-----------------------------------------------------------------------------------------------------------------------------------------------------------------------------------------------------------------------|
| Journal:                      | <i>BMJ Open</i>                                                                                                                                                                                                       |
| Manuscript ID                 | bmjopen-2021-052872                                                                                                                                                                                                   |
| Article Type:                 | Original research                                                                                                                                                                                                     |
| Date Submitted by the Author: | 29-Apr-2021                                                                                                                                                                                                           |
| Complete List of Authors:     | Lien, Anette; University of Agder, Faculty of Health and Sport Sciences<br>Rohde, Gudrun; University of Agder, Faculty of Health and Sport Sciences; Sorlandet Hospital Kristiansand, Department of Clinical Research |
| Keywords:                     | MEDICAL ETHICS, ONCOLOGY, Head & neck tumours < ONCOLOGY                                                                                                                                                              |
|                               |                                                                                                                                                                                                                       |

SCHOLARONE™  
Manuscripts

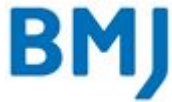

I, the Submitting Author has the right to grant and does grant on behalf of all authors of the Work (as defined in the below author licence), an exclusive licence and/or a non-exclusive licence for contributions from authors who are: i) UK Crown employees; ii) where BMJ has agreed a CC-BY licence shall apply, and/or iii) in accordance with the terms applicable for US Federal Government officers or employees acting as part of their official duties; on a worldwide, perpetual, irrevocable, royalty-free basis to BMJ Publishing Group Ltd ("BMJ") its licensees and where the relevant Journal is co-owned by BMJ to the co-owners of the Journal, to publish the Work in this journal and any other BMJ products and to exploit all rights, as set out in our [licence](#).

The Submitting Author accepts and understands that any supply made under these terms is made by BMJ to the Submitting Author unless you are acting as an employee on behalf of your employer or a postgraduate student of an affiliated institution which is paying any applicable article publishing charge ("APC") for Open Access articles. Where the Submitting Author wishes to make the Work available on an Open Access basis (and intends to pay the relevant APC), the terms of reuse of such Open Access shall be governed by a Creative Commons licence – details of these licences and which [Creative Commons](#) licence will apply to this Work are set out in our licence referred to above.

Other than as permitted in any relevant BMJ Author's Self Archiving Policies, I confirm this Work has not been accepted for publication elsewhere, is not being considered for publication elsewhere and does not duplicate material already published. I confirm all authors consent to publication of this Work and authorise the granting of this licence.

1 **Being the next of kin of a person with a brain tumor: a metasynthesis**  
2 **focusing on coping factors and strategies**

3 Windsland, Anette<sup>1</sup>

4 [anette\\_lien@hotmail.com](mailto:anette_lien@hotmail.com)

5 Gudrun Rohde<sup>1, 2</sup>

6 [gudrun.e.rohde@uia.no](mailto:gudrun.e.rohde@uia.no)

7  
8 <sup>1</sup>Faculty of Health and Sport Sciences, University of Agder, Kristiansand, Norway

9 <sup>2</sup>Department of Clinical Research, Sorlandet Hospital, Kristiansand, Norway

10

11 **Corresponding author:**

12 Gudrun Rohde, Faculty of health and Sport Sciences, University of Agder, Postbox 422,

13 4604 Kristiansand, Norway

14

15 **Word Count:** 4014

16

17 **ABSTRACT**

18 **Introduction:** Being the next of kin of a person with a brain tumor is a stressful  
19 experience. For many, being a next of kin involves fear, insecurity, and overwhelming  
20 responsibility. The purpose of this study was to identify and synthesize qualitative primary  
21 studies to explore coping factors and strategies that next of kin use in their role.

22 **Methods:** A qualitative metasynthesis guided by Sandelowski and Barroso's guidelines  
23 was used. The databases Medline, CHINAL, and PsycINFO were searched for studies  
24 from January 2000 to March 3, 2021. The inclusion criteria were: qualitative primary

1  
2  
3 25 studies focusing on factors or strategies used by the next of kin aged 18 years of age or  
4  
5 26 older of persons with brain tumors.  
6  
7

8 27 **Results:** Of 1371 screened records, data from 19 studies, including 332 participants (200  
9  
10 28 female, 78 male, and 54 unclassified) were analyzed into metasummaries and a  
11  
12 29 metasynthesis. The next of kin rely on coping factors such as their personal characteristics,  
13  
14 30 finding meaning in their situation, external support, hope and religion, and having someone  
15  
16 31 to talk to. Strategies to manage the situation involve regaining control, being proactive, and  
17  
18 32 acceptance.  
19  
20  
21

22 33 **Conclusion:** Coping factors and strategies within themselves, in their surroundings and  
23  
24 34 assistance from a higher power are used by those who are next of kin for people with brain  
25  
26 35 tumors. It is important that health-care professionals suggest and facilitate these coping  
27  
28 36 factors and strategies because this could reduce stress and make the role of next of kin  
29  
30 37 more manageable.  
31  
32  
33

34 38 **Keywords:** brain tumor; coping factors; coping strategies; metasynthesis; next of kin;  
35  
36 39 review  
37  
38  
39

40

#### 41 **Strengths and limitations of the study**

- 42
- 43 • The qualitative approach makes an important contribution to the research field by  
44 providing a deeper understanding of coping factors and strategies used by the next  
45 of kin of a person with a brain tumor.
  - 46 • Most of the included studies in this metasynthesis were high-quality studies.
- 47  
48  
49  
50  
51  
52  
53  
54  
55  
56  
57  
58  
59  
60

- 1  
2  
3 46 • Our sample is highly multicultural with different geographical origins represented  
4  
5 47 and includes different welfare and health-care systems, and different cultures and  
6  
7 48 religions.  
8  
9  
10 49 • A limitation is that some of the subthemes, or parts of their content, could have  
11  
12 50 been categorized in the other main theme.  
13  
14  
15 51 • The majority of the sample comprised women. A more heterogeneous sample  
16  
17 52 might have revealed more nuanced findings of the role of next of kin.  
18  
19  
20 53

## 54 INTRODUCTION

55 In 2018, 885 people with central nervous system cancer were registered in Norway.<sup>1</sup>  
56 Worldwide there were 296,851 people.<sup>2</sup> The diagnosis is very confronting, with 56% of  
57 patients experiencing one or more symptoms. Hemiparesis and cognitive challenges are  
58 most frequently reported but also headache, nausea and vomiting, vision challenges,  
59 epileptic seizures, and personality changes are considered common symptoms.<sup>3</sup> Changes in  
60 behavior and personality are considered particularly challenging, both for the patient and  
61 for the next of kin, as this may include apathy, loss of initiative and empathy, indifference,  
62 selfishness, physical and mental aggression, impaired emotional control and social  
63 abilities, and tendencies toward childish behavior, among others.<sup>4</sup> Studies show that the  
64 disease can be more challenging and stressful for the next of kin than for the patients. The  
65 next of kin have high rates of depression, anxiety, diverse physical pain, difficulty  
66 adapting, loneliness, and absence from work, as well as a reduced quality of life.<sup>5-9</sup> Studies  
67 also show that both patients and next of kin miss out on additional follow-up, support, and

1  
2  
3 68 information from health-care providers, family, friends, and the community in their  
4  
5 69 struggle to cope with everyday life.<sup>10 11</sup>  
6  
7  
8 70 Despite the severe challenges this disease imposes on next of kin, there are only a few  
9  
10 71 primary qualitative studies that have investigated the coping factors that make everyday  
11  
12 72 life more manageable or which strategies next of kin use to cope with their new role and  
13  
14 73 tasks. To our knowledge, this research has not been synthesized. Such information is of  
15  
16 74 great importance, especially for health-care providers working with this group of  
17  
18 75 caregivers. With improved understanding, they could expect to be better able to facilitate  
19  
20 76 more manageable everyday life among the next of kin.<sup>12</sup> There is some quantitative  
21  
22 77 research directed at these aspects, but we wanted studies that were more complementary  
23  
24 78 and personal, hence the choice of qualitative studies. Therefore, the purpose of this  
25  
26 79 metasynthesis was to identify and synthesize evidence from primary qualitative studies  
27  
28 80 regarding the experience of next of kin with coping factors and strategies in their role as  
29  
30 81 next of kin for a person with a brain tumor. The findings are discussed in the context of  
31  
32 82 Lazarus and Folkman's stress theory<sup>13</sup> and the approach to coping with stress to interpret  
33  
34 83 our findings in a theoretical context.  
35  
36  
37  
38  
39  
40

## 41 **METHODS**

### 42 *Design*

43  
44  
45 85  
46  
47 86 The study was a metasynthesis within the interpretative paradigm. It was inspired by a  
48  
49 87 phenomenological–hermeneutic design because the aim was to identify and synthesize  
50  
51 88 qualitative primary studies that explored next of kin attitudes and experiences.<sup>14</sup> The  
52  
53 89 metasynthesis process consisted of five steps: (1) formulating the purpose and rationale of  
54  
55 90 the study; (2) searching for and retrieving relevant qualitative research studies; (3)  
56  
57  
58  
59  
60

1  
2  
3 91 critically appraising the included studies; (4) classifying the findings, and finally; (5)  
4  
5 92 synthesizing the findings.  
6  
7

8 93 ***Search strategy***  
9

10  
11 94 In collaboration with an experienced librarian, we conducted a systematic search within the  
12  
13 95 PsycINFO, OVID, CHINAL, and Medline databases via EBSCO host up from January  
14  
15 96 2000 until March 3, 2021.  
16  
17

18 97 To search the PsycINFO database, we used the following terms: *((qualitative adj2*  
19  
20 98 *(research\* or design\* or stud\* or method\*)) or hermeneutic\* or “grounded theory” or*  
21  
22 99 *“meta synthes\*” or metasynthesis\* or metaethnograph\* or interview\* or phenomenolog\**  
23  
24 100 *or thematic or themes or experience\*).ti,ab,hw,id. or exp qualitative methods or*  
25  
26 101 *phenomenology AND (caregiver\* or famil\* or next of kin\* or relatives or spous\* or wife*  
27  
28 102 *or husband\* or sibling\* or sister\* or brother\* or dependent\* or loved one\* or parent\* or*  
29  
30 103 *mother\* or father\* or carer\* or care giver\*).ti,ab,hw,id. AND glioma\*.ti,ab,hw,id. OR*  
31  
32 104 *(brain adj2 (cancer or neoplasm\* or tumor\*).ti,ab,hw,id.*  
33  
34  
35  
36

37 105 In Medline and CHINAL, we used the following terms: *caregiver\* OR famil\* OR “next of*  
38  
39 106 *kin\*” OR relatives OR spous\* OR wife OR husband\* OR sibling\* OR brother\* OR sister\**  
40  
41 107 *OR dependent\* OR “loved one\*” OR parent\* OR mother\* OR father\* OR carer\* OR*  
42  
43 108 *“care giver\*” AND (MH “Qualitative Studies+”) OR (MH “Qualitative Research+”) OR*  
44  
45 109 *(MH “Grounded Theory”) OR Interview\* OR experienc\* OR phenomenolog\* OR*  
46  
47 110 *(qualitative W1 (research\* OR method\* OR design\* OR stud\*)) OR themes OR thematic*  
48  
49 111 *OR “audio recording” OR audiorecording OR metasynthes\* OR “meta synthes\*” OR*  
50  
51 112 *metaetnograph\* AND (MH “Glioma+”) OR glioma OR gliomas OR glioblastom\* OR*  
52  
53 113 *brain W1 (cancer OR tumor\* or neoplasm\*).*  
54  
55  
56  
57  
58  
59  
60



1  
2  
3 114 The inclusion criteria were qualitative primary studies in English or a Nordic language that  
4  
5 115 aimed to explore the factors or strategies used by the next of kin of persons with brain  
6  
7 116 tumors, regardless of tumor type and stage that enhanced their role as next of kin. The next  
8  
9 117 of kin had to be 18 years of age or older. The exclusion criteria were studies that did not  
10  
11 118 clearly identify coping factors or strategies, factors or strategies that included the  
12  
13 119 participants' experiences in the role of bereaved and not next of kin, and studies including  
14  
15 120 diagnoses other than a brain tumor.

16  
17  
18  
19  
20 121 ***Search outcome***

21  
22 122 The search strategy generated 1 371 unique citations. Titles and abstracts were screened by  
23  
24 123 the authors using Rayyan.<sup>15</sup> Sixty-six papers were read in full and evaluated against the  
25  
26 124 inclusion criteria by both authors; 19 of these were included in the metasynthesis. Figure 1  
27  
28 125 shows the Preferred Reporting Items for Systematic Reviews and Meta-Analyses  
29  
30 126 (PRISMA) flowchart with a full overview of the screening process. The search output is  
31  
32 127 presented in the PRISMA flowchart. A final consensus regarding the eligible articles was  
33  
34 128 obtained through a group discussion between the authors. The authors read the full text of  
35  
36 129 the eligible articles and independently extracted data from the included studies; this  
37  
38 130 process is illustrated in Figure 1. Consensus for data extraction was obtained as part of a  
39  
40 131 group discussion between the authors. Table 1 lists the title, author(s), study country, year  
41  
42 132 of publication, aim, analysis, and study participants of all included studies. Most studies  
43  
44 133 were from Europe: Sweden (3), Great Britain (3), Denmark (1), Belgium (1), and Turkey  
45  
46 134 (1); seven were from Canada (3) and the USA (4), two were from Australia, and one was  
47  
48 135 from Taiwan. The tumor type and stage varied. For details, see Table 1.

49  
50  
51  
52  
53  
54  
55 136 Figure 1 about here  
56  
57  
58  
59  
60

1  
2  
3 137 Table 1 about here  
4  
5

6 138 ***Quality appraisal***  
7

8  
9 139 The quality of the 19 papers was evaluated using the Critical Appraisal Skills Program  
10  
11 140 (CASP) for qualitative studies. The first evaluation was conducted blinded and  
12  
13 141 independently by AW and GR, whose CASP evaluations were then compared. Using the  
14  
15 142 criteria in CASP for independent assessment, the authors mutually agreed on a final quality  
16  
17 143 evaluation. For details, see Table 2.  
18  
19

20  
21 144 The included studies appraised according to CASP are listed in Table 2. All studies had  
22  
23 145 clearly stated the study aim and the qualitative methodologies were considered appropriate.  
24  
25 146 Furthermore, several of the studies had been published in highly ranked journals. The most  
26  
27 147 poorly addressed issue was the influence of the researcher on the research and vice versa.  
28  
29

30 148 Table 2 about here  
31  
32

33 149 ***Data abstraction and analyses***  
34

35  
36 150 As suggested by Sandelowski and Barroso,<sup>14</sup> two approaches to qualitative synthesis were  
37  
38 151 used. The first of these involved qualitative metasummaries of qualitative findings from  
39  
40 152 the primary studies. This method is defined as qualitative, but the findings are presented  
41  
42 153 quantitatively. The second involved a metasynthesis that developed new interpretations of  
43  
44 154 the target findings from the primary studies.<sup>14</sup> The narrative analysis was inspired by  
45  
46 155 Lindseth and Nordberg's phenomenological–hermeneutic methods.<sup>16</sup> Three steps were  
47  
48 156 followed. First, the empirical materials were read several times. Second, after extraction,  
49  
50 157 the target findings were imported into NVivo 11 data management software for further  
51  
52 158 analysis.<sup>17</sup> The text was read line-by-line to identify meaning units, subthemes, and  
53  
54 159 themes. Third, the researchers aimed to achieve a comprehensive understanding of the  
55  
56  
57  
58  
59  
60

1  
2  
3 160 empirical materials, meaning units, and themes, and to relate these to the aim and research  
4  
5 161 question of the metasynthesis.<sup>16</sup> The analytic themes were identified by AW and discussed  
6  
7 162 with GR. The process of deriving the themes was inductive. The contribution of targeted  
8  
9 163 findings from each of the included papers is outlined, and quotations are used to illustrate  
10  
11 164 and support the findings, which increases the trustworthiness of the study. To validate the  
12  
13 165 findings, both authors participated in discussions of the empirical analysis and in writing  
14  
15 166 up the findings. Ethical approval was not required for the study.  
16  
17  
18  
19

20 167 Table 3 about here  
21  
22

### 23 168 *Synthesis*

24  
25  
26 169 Qualitative metasynthesis provides novel interpretations of the target findings from  
27  
28 170 primary studies.<sup>14</sup> The two main themes of this metasynthesis were coping factors and  
29  
30 171 coping strategies. The theme “coping factors” consisted of the subthemes, personal  
31  
32 172 characteristics, meaningful external support and having someone to talk to, and hope and  
33  
34 173 religion. The theme “coping strategies” consisted of the subthemes regain control, fight  
35  
36 174 against, and acceptance. For a list of the studies that generated findings for the main  
37  
38 175 themes and subthemes, see Table 3.  
39  
40  
41  
42

## 43 176 **PATIENT AND PUBLIC INVOLVEMENT**

44  
45  
46  
47 177 This systematic review is based on published primary studies and do not involve public  
48  
49 178 involvement.  
50  
51  
52  
53  
54  
55  
56  
57  
58  
59  
60

## 179 RESULTS

180 The findings are presented as metasummaries supported by tables and figures, and as a  
181 metasynthesis presented under two themes.

### 182 *Metasummaries*

183 The 19 included studies consisted of 332 participants (200 women, 78 men, and 54 not  
184 classified). The focus was on the following themes: the needs of the next of kin;<sup>3 18-22</sup> their  
185 overall experiences as next of kin;<sup>8 23 24</sup> coping and coping mechanisms;<sup>25-27</sup> postoperative  
186 caregiving;<sup>28 29</sup> being a next of kin in the palliative phase;<sup>30 31</sup> support factors  
187 experienced;<sup>32</sup> how the caregiving changed over time;<sup>33</sup> and factors influencing treatment  
188 choice in the palliative phase.<sup>34</sup> Three of the studies were undertaken six months after  
189 diagnosis,<sup>27 28 33</sup> and three in the patients' palliative phase or postmortem.<sup>30 31 34</sup> In five  
190 studies, all the patients were the children of the informants.<sup>8 26 27 30 31</sup>

### 191 *Metasynthesis*

#### 192 *Main theme 1: Coping factors within the next of kin and as external support*

193 Personal characteristics such as a strong and positive personality were important coping  
194 factors for next of kin in new challenging situations.<sup>23 26 34</sup> Showing empathy for the  
195 patient and also having health professionals available were important because the next of  
196 kin situation could easily engender feelings such as discouragement and reproach.<sup>23</sup> A  
197 positive mood and humor were also emphasized.<sup>26</sup>

198 The role as next of kin was considered to be complete and important.<sup>21 23 25 28</sup>

199 *"But caring for him is something I will do—it is not a burden."*<sup>28</sup> (p. 81)

1  
2  
3 200 Engagement and commitment in the care of their relatives were highlighted by many next  
4  
5 201 of kin, especially when the patients appreciated the help.<sup>21</sup> The engagement was even  
6  
7 202 stronger when the emotional bond between patient and next of kin was strong.<sup>18 19 26 32</sup>  
8  
9  
10 203 However, other studies revealed less engagement and commitment, and underlined anger  
11  
12 204 and reluctance with the new role and the heavy responsibilities and sacrifices of the next of  
13  
14 205 kin that impacted their own needs and wishes.<sup>19 20 23 28 30</sup>  
16  
17 206 External support made the role of next of kin easier to cope with. The support was given  
18  
19 207 by family, friends, neighbors, colleagues and workplaces, health personnel, schools, the  
20  
21 208 religious community, people in the local community, and even strangers.<sup>3 8 18-32</sup> The  
22  
23 209 support from health-care professionals was especially important. This support included  
24  
25 210 emotional support and assistance during patient care and treatment.<sup>3 8 18-24 26-32</sup> The  
26  
27 211 importance of assistance such as medical supervision and nursing care was emphasized,<sup>8 20</sup>  
28  
29 212 <sup>26</sup> with next of kin noting that this made it possible to feel like a partner again,<sup>21</sup> while  
30  
31 213 concurrently allowing anticipated time alone.<sup>22</sup> A well-known health-care professional was  
32  
33 214 crucial in making this possible, because it implied that the patient received the best care as  
34  
35 215 they were known to the health-care professional, and also because the assistance was  
36  
37 216 considered to be less intrusive.<sup>21 22</sup> To experience the assistance with care as a coping  
38  
39 217 factor, it was crucial that care be compassionate and of the best quality. These qualities  
40  
41 218 emphasized the health professional's genuine care and gave the next of kin hope and desire  
42  
43 219 to fight the disease.<sup>8 19 21 24 26</sup>  
44  
45  
46  
47  
48  
49

50 220 *“She (neurosurgeon) had to give us some bad news some of the time...*  
51  
52 221 *and you couldn't ask for a better manner in her delivery of that bad*  
53  
54 222 *news, or her support in what we were going through.”<sup>32</sup> (p. 8)*  
55  
56  
57  
58  
59  
60

1  
2  
3 223 When next of kin experienced that their loved ones received a low quality of care or  
4  
5 224 suffered malpractice, it implied mistrust of the health-care system and weakened the  
6  
7  
8 225 experience of health-care professionals as a support factor.<sup>8 18 21 22</sup> Emotional support from  
9  
10 226 health-care professionals implied an acknowledgment that the disease affected not only the  
11  
12 227 patients, but also their next of kin. It also implied that the health-care professionals  
13  
14 228 recognized and met the wishes of the next of kin for active participation in monitoring the  
15  
16 229 patient's disease course.<sup>21 23 24 31</sup> Next of kin who did not have such involvement felt  
17  
18 230 ignored, useless, and helpless.<sup>23 26</sup>  
19  
20  
21  
22 231 Support from family and friends was invaluable in the care tasks and in coping with the  
23  
24 232 role of the next of kin.  
25

26  
27 233 *“Just support from family and friends, that was important to me, and just*  
28  
29 234 *knowing that I could call on them...”<sup>20</sup> (p. 1098)*  
30  
31

32  
33 235 Social, practical, and emotional support was emphasized, and included such things as  
34  
35 236 economic help, childcare, transport, and housekeeping.<sup>8 20 22 23 26-29 31 32</sup> Some next of kin  
36  
37 237 would have appreciated even more support and help from family and friends, preferably  
38  
39 238 given on their own initiative.<sup>18 20 22 23 32 33</sup>  
40  
41  
42  
43 239 Having someone to confide in and talk to were also important in coping with the role as  
44  
45 240 next of kin. Supportive conversations with health-care professionals were highly  
46  
47 241 appreciated by many next of kin. However, this required the health-care professional's  
48  
49 242 understanding and empathy for the situation of the patient as well as of their next of kin,  
50  
51 243 and preferably that they should be available at all times.<sup>19 21 24 27 28 34</sup> Discussions with  
52  
53 244 family and friends were also important,<sup>19 22 23</sup> and could even produce a stronger bond.<sup>23</sup>  
54  
55 245 Such a bond required families and friends to understand and recognize the challenges faced  
56  
57  
58  
59  
60

1  
2  
3 246 by the next of kin.<sup>22</sup> Support groups and conversations with other next of kin were also  
4  
5 247 highlighted. These conversations could be face-to-face or via the Internet.<sup>3 20 22 27 31-33</sup>  
6  
7

8  
9 248 *“From time to time, I need to be able to talk to someone. Because when I*  
10  
11 249 *lay down in the evening, then it starts to work in the inside.”<sup>21</sup> (p. 411)*  
12  
13

14 250 On the other hand, support groups were also considered demanding because it was difficult  
15  
16 251 to listen to other families’ stories. Furthermore, for some it was considered a waste of time  
17  
18 252 to spend valuable hours with people other than their closest family members.<sup>8 20 28</sup>  
19  
20 253 Hope and religion were emphasized as important coping factors. The next of kin hoped  
21  
22 254 that a miraculous treatment would be developed so that their loved ones could survive the  
23  
24 255 disease or just have a better quality of life.<sup>3 8 18-21 24 30 31</sup>  
25  
26  
27  
28

29 256 *You see a positive evolution, and everything that goes better is good for*  
30  
31 257 *her. (...) Nobody can forbid us to have hope. And miracles happen.*  
32  
33 258 *Whether we believe it or not, that’s not the point, it is the only thing to*  
34  
35 259 *focus on.”<sup>21</sup> (p. 409)*  
36  
37  
38  
39

40 260 Hope gave a reason to fight, although it weakened in the palliative phase.<sup>19 24 31</sup> Faith  
41  
42 261 strengthened the hope of healing during the treatment period and gave some form of peace  
43  
44 262 in the final palliative phase. In most cases, hope was related to faith.<sup>23 24 27 31 34</sup>  
45  
46  
47

48 263 *Main theme 2: Coping strategies – control and proactivity*  
49

50  
51 264 Regaining control of the situation was a frequent coping strategy and for most, this  
52  
53 265 included being provided with enough information to allow an overview of what to expect,  
54  
55 266 which implied some form of security.<sup>8 18-21 27 32 34</sup>  
56  
57  
58  
59  
60

1  
2  
3 267 *“So it’s a, it’s a roller coaster of emotion but for the most part I’ve been,*  
4  
5 268 *‘What do we need to do? Where do we need to be?’ And then just read,*  
6  
7 269 *read, read whatever I can find out, whatever information because I feel*  
8  
9  
10 270 *like whatever I know, I can ask for.”*<sup>27</sup> (p. 34)  
11  
12

13 271 The information provided should be adapted to the situation and the disease trajectory, and  
14  
15 272 preferably given by health-care professionals.<sup>18 20 21 23 26 34</sup> The next of kin often hid this  
16  
17 273 information from the patients to protect them and not diminish their hope.<sup>8 24 27 28 31</sup>  
18  
19 274 To regain control meant not only control of the diagnosis, but also personal control and  
20  
21 275 control over their own reactions. In some cases, the next of kin denied their feelings. Some  
22  
23 276 even denied the entire diagnosis,<sup>18 23 26 27</sup> and instead focused on being strong for the  
24  
25 277 patient and the entire family.<sup>21 23 27 29-31 33</sup> One next of kin in Edvardsson and Ahlstroms’  
26  
27  
28 278 (2008) study<sup>23</sup> reported:  
29  
30  
31

32  
33 279 *“I’ve sort of stowed it all away, I suppose. It is as if I’d experienced it*  
34  
35 280 *from the outside or seen it on TV. It’s often that way with sorrowful*  
36  
37 281 *things.”* (p. 588)  
38  
39  
40

41 282 Being proactive and fighting the disease were also important coping strategies because  
42  
43 283 they were better than not doing anything.<sup>8 19 23 24 31</sup>  
44  
45

46 284 *“People ask you how you cope. But what if you were to give up? You’ve*  
47  
48 285 *got to cope—and we do have each other! (...).”*<sup>23</sup> (p. 588)  
49  
50

51  
52 286 This implied adopting a healthier lifestyle, including changing diet and exercise habits,  
53  
54 287 hoping that this would improve the effects of medical treatment,<sup>19 24</sup> or trying alternative  
55  
56  
57  
58  
59  
60



1  
2  
3 288 treatments.<sup>8 31</sup> However, an increasing feeling of powerlessness was emphasized if the  
4  
5 289 fight, in the form of these actions and treatments, did not meet the hope of a cure.<sup>19 21 24 31</sup>  
6  
7  
8 290 As the disease progressed and life went on, most next of kin accepted the diagnosis,  
9  
10 291 prognosis, and a new pattern to everyday life.<sup>8 24 25 27 31</sup> There was a striving for normality,  
11  
12 292 starting with recommencing hobbies, work, and school for children.<sup>8 24 25 27 28 30 31 33</sup> This  
13  
14  
15 293 was particularly important within families with children. At the same time, accepting  
16  
17 294 disease progression or a bad diagnosis was most challenging when the patient was a  
18  
19 295 child.<sup>31</sup>  
20  
21  
22

## 23 296 **DISCUSSION**

24  
25  
26 297 This metasynthesis aimed to explore those factors and strategies that enhanced the ability  
27  
28 298 of next of kin to cope with their experience as the next of kin of a person with a brain  
29  
30 299 tumor. Valuable coping factors included personal characteristics, finding meaning in the  
31  
32 300 situation, external support, hope and religion, and having someone to talk to. Strategies to  
33  
34 301 manage the situation involved regaining control, being proactive, and acceptance.  
35  
36  
37 302 We used Lazarus and Folkman's transactional stress theory published in 1984 in the  
38  
39 303 discussion of our findings. Lazarus and Folkman define coping as a cognitive and  
40  
41 304 behavioral endeavor under constant change, dealing with external and/or internal demands  
42  
43 305 that a cognitive assessment indicates are stressful or that exceed personal resources.<sup>13 35</sup>  
44  
45  
46 306 Being the next of kin to a person with a brain tumor is considered to be a negative stressor  
47  
48 307 because of the challenging life situation and care tasks. Nevertheless, several next of kin  
49  
50 308 included in the metasynthesis expressed a desire to fight the disease and to gain control  
51  
52 309 over the situation. This is described by Lazarus and Folkman<sup>13</sup> as a secondary assessment  
53  
54 310 of the situation, in which the next of kin decide which measures to implement. One such  
55  
56  
57  
58  
59  
60

1  
2  
3 311 measure could be to gain personal control—one of the most important and stress-reducing  
4  
5 312 personal strategies available.<sup>13</sup>  
6  
7

8 313 A possible explanation for the proactive attitude of next of kin toward the disease may be  
9  
10 314 their obligation and commitment to the patient. Commitment is an expression of something  
11  
12 315 of great importance and can cause one to be willing to meet threats and challenges that he  
13  
14 316 or she would otherwise avoid.<sup>13</sup> However, our findings revealed that the experience of  
15  
16 317 contributing to something meaningful, not the obligation to do so, promoted coping in the  
17  
18 318 situation. We consider that this is caused by the fact that obligation does not automatically  
19  
20 319 make an action meaningful, but rather that it can be experienced as a compulsion. This  
21  
22 320 assumption is strengthened by the findings that the tasks as next of kin could arouse  
23  
24 321 emotions such as anger and aversion to the patient and to the diagnosis, rather than coping.  
25  
26 322 Several studies refer to the same ambivalent experience regarding commitment and  
27  
28 323 attitudes toward being a next of kin.<sup>36 37</sup>  
29  
30  
31  
32  
33

34 324 External support was the factor that most relatives emphasized as promoting coping. It was  
35  
36 325 described as invaluable, which was also confirmed in other studies,<sup>38 39</sup> and in Lazarus and  
37  
38 326 Folkman's transactional stress theory.<sup>13</sup> At the same time, in both this metasynthesis and in  
39  
40 327 other studies, next of kin voiced a strong desire and longing for even greater external  
41  
42 328 support.<sup>38 39</sup> The findings of the metasynthesis also showed that the configuration and  
43  
44 329 arrangement of the support, especially that given by health-care providers is of great  
45  
46 330 importance. This may indicate that health-care providers do not offer support appropriate  
47  
48 331 to individual needs of the next of kin and for the care situations, possibly as a consequence  
49  
50 332 of a lack of knowledge among health-care providers about how this affects the experience  
51  
52 333 of being next of kin.  
53  
54  
55  
56  
57  
58  
59  
60

1  
2  
3 334 The findings of this metasynthesis show that several next of kin considered hope to be an  
4  
5 335 important coping factor, especially during the disease trajectory. Hope has also been  
6  
7 336 shown to be an extensional coping factor in several studies,<sup>40 41</sup> and transactional stress  
8  
9  
10 337 theory states that faith and hope are two of the most important personal factors in the  
11  
12 338 cognitive assessment of stressors.<sup>13 35</sup> Furthermore, according to Lazarus and Folkman,<sup>13</sup>  
13  
14 339 the two factors are strongly related, which is consistent with the findings of our  
15  
16 340 metasynthesis. For several next of kin, hope was strongly grounded in religion. This was  
17  
18 341 especially prominent in the studies conducted in the palliative phase, which indicated that  
19  
20 342 faith is strengthened when there is no hope of curative treatment. The same pattern has also  
21  
22 343 been reported in other studies describing cancer patients' experiences of palliative care.<sup>42 43</sup>  
23  
24  
25 344 As the disease progressed, several next of kin accepted the diagnosis and its burden. Their  
26  
27 345 fight against the disease diminished to some extent, and the relatives instead tried to  
28  
29 346 "normalize" everyday life as much as possible. Similar acceptance is also reported by next  
30  
31 347 of kin of other cancer patients, especially in the palliative phase.<sup>44 45</sup> Lazarus and Folkman  
32  
33 348 describe this as a reassessment, referring to a changed cognitive assessment of the stressor  
34  
35 349 based on new information from the environment and/or the person.<sup>13</sup>  
36  
37  
38  
39  
40

#### 41 **Strengths and limitations**

42  
43  
44  
45 351 A strength of this metasynthesis is that the primary search in the databases was conducted  
46  
47 352 with the assistance of an experienced librarian, in an attempt to ensure that as many as  
48  
49 353 possible of the relevant studies were included.<sup>46</sup> Furthermore, most of the included studies  
50  
51 354 were of high methodological quality (see Table 2). Our sample was also highly  
52  
53 355 multicultural (see Table 1). This attribute strengthens the validity of the metasynthesis  
54  
55 356 since geographical origin could have affected the study sample because of different  
56  
57  
58  
59  
60

1  
2  
3 357 participant backgrounds related to different welfare and health-care systems, cultures,  
4  
5 358 and/or religions.  
6  
7

8 359 A limitation of our metasynthesis is that one of the 66 articles intended to be read in full  
9  
10 360 text could not be obtained.<sup>47</sup> The formation of the subthemes is also a possible limitation.  
11  
12 361 Some of the subthemes, or parts of their content, could have been categorized in the other  
13  
14  
15 362 main theme. Both main themes and subthemes overlap in several cases, and we have read  
16  
17 363 similar studies<sup>24 27</sup> where the findings are categorized differently than in metasynthesis. We  
18  
19 364 chose to be true to the informants' statements and designated the location based on the  
20  
21 365 informants' way of speaking and description of the experience. Another possible limitation  
22  
23 366 is that our sample consisted mainly of women (see Table 1). A more heterogeneous sample  
24  
25 367 might have revealed more nuanced findings and different experiences of the role of the  
26  
27 368 next of kin.  
28  
29  
30

## 31 32 369 **CONCLUSION** 33 34

35  
36 370 The findings of this metasynthesis show that next of kin experience and use a range of  
37  
38 371 coping factors and strategies in their role. Their experience is marked by individual  
39  
40 372 differences. It is of great importance that health-care providers offer assistance that is  
41  
42 373 individually adapted for these coping factors and strategies because this can reduce stress  
43  
44 374 among the next of kin. The coping experience seems to go through phases, and further  
45  
46 375 information is needed to understand fully how and when the various factors and strategies  
47  
48 376 are used as the disease progresses. Longitudinal studies would therefore be of particular  
49  
50 377 interest in this field.  
51  
52  
53  
54  
55  
56  
57  
58  
59  
60

1  
2  
3 379 **Supplementary information**  
4  
5

6 380 The manuscript has been edited by OnLine English (<https://www.oleng.com.au>) to comply  
7  
8 381 with international publishing guidelines.  
9  
10

11  
12 382 **Acknowledgments**  
13  
14

15 383 Librarian Ellen Sejersted at the University of Agder assisted in the development of the  
16  
17 384 search strategy.  
18  
19

20  
21 385 **Authors' contributions**  
22  
23

24 386 AWL and GR designed the research project and developed the research plan. Librarian  
25  
26 387 Ellen Sejersted at the University of Agder and AWL were responsible for the literature  
27  
28 388 search, while AWL and GR were responsible for the analysis. Both authors were involved  
29  
30 389 in the screening and inclusion of the studies, reviewed the manuscript, and contributed to  
31  
32 390 the revision of the paper. Both authors read and approved the final version of the paper.  
33  
34  
35

36 391 **Funding**  
37  
38  
39

40 392 This research did not receive grants from any funding agency in the public, commercial, or  
41  
42 393 not-for-profit sectors.  
43  
44

45 394 **Competing interests**  
46  
47

48  
49 395 The authors declare that they have no competing interests.  
50  
51

52 396 **Patient consent for publication**  
53  
54

55 397 Not required  
56  
57

58 398 **Ethics approval**  
59  
60

1  
2  
3 399 Ethical approval was not required, as no primary data were collected as part of this study.  
4  
5

6 400 **Data availability**  
7

8 401 Data are available on reasonable request.  
9  
10

11 402  
12  
13  
14  
15  
16  
17  
18  
19  
20  
21  
22  
23  
24  
25  
26  
27  
28  
29  
30  
31  
32  
33  
34  
35  
36  
37  
38  
39  
40  
41  
42  
43  
44  
45  
46  
47  
48  
49  
50  
51  
52  
53  
54  
55  
56  
57  
58  
59  
60

For peer review only

403 **References**

404

- 405 1. Kreftregisteret. Statistikkbank, 2020.
- 406 2. World Cancer Research Fund. Worldwide cancer data 2018 [Available from:  
407 <https://www.wcrf.org/dietandcancer/cancer-trends/worldwide-cancer-data>.
- 408 3. Arber A, Faithfull S, Plaskota M, et al. A study of patients with a primary malignant  
409 brain tumour and their carers: symptoms and access to services. *Int J Palliat Nurs*  
410 2010;16(1):24-30. doi: 10.12968/ijpn.2010.16.1.46180 [published Online First:  
411 2010/01/22]
- 412 4. Helvoirt Rv, Holt, M. H., Bjerva, J., Langfeldt, B., Throndsen, A., & Drangsholt, L. K. .  
413 Dagpost-basert multidisiplinær tilbud for pasienter med høygradig gliom: første  
414 erfaringer ved Senter for kreftbehandling (SFK), Kristiansand. *ONKONYTT* 2016
- 415 5. Applebaum AJ, Kryza-Lacombe M, Buthorn J, et al. Existential distress among  
416 caregivers of patients with brain tumors: a review of the literature. *Neurooncol*  
417 *Pract* 2016;3(4):232-44. doi: 10.1093/nop/npv060 [published Online First:  
418 2016/12/01]
- 419 6. Geng HM, Chuang DM, Yang F, et al. Prevalence and determinants of depression in  
420 caregivers of cancer patients: A systematic review and meta-analysis. *Medicine*  
421 *(Baltimore)* 2018;97(39):e11863. doi: 10.1097/md.00000000000011863 [published  
422 Online First: 2018/10/04]
- 423 7. Cavers D, Hacking B, Erridge SE, et al. Social, psychological and existential well-being  
424 in patients with glioma and their caregivers: a qualitative study. *Cmaj*  
425 2012;184(7):E373-82. doi: 10.1503/cmaj.111622 [published Online First:  
426 2012/03/21]
- 427 8. Russell B, Collins A, Dowling A, et al. Predicting distress among people who care for  
428 patients living longer with high-grade malignant glioma. *Support Care Cancer*  
429 2016;24(1):43-51. doi: 10.1007/s00520-015-2739-0 [published Online First:  
430 2015/04/26]
- 431 9. Wasner M, Paal P, Borasio GD. Psychosocial care for the caregivers of primary  
432 malignant brain tumor patients. *J Soc Work End Life Palliat Care* 2013;9(1):74-95.  
433 doi: 10.1080/15524256.2012.758605 [published Online First: 2013/02/27]
- 434 10. Applebaum AJ, Buda K, Kryza-Lacombe M, et al. Prognostic awareness and  
435 communication preferences among caregivers of patients with malignant glioma.  
436 *Psychooncology* 2018;27(3):817-23. doi: 10.1002/pon.4581 [published Online  
437 First: 2017/11/11]
- 438 11. Cavers D, Hacking B, Erridge SC, et al. Adjustment and support needs of glioma  
439 patients and their relatives: serial interviews. *Psychooncology* 2013;22(6):1299-  
440 305. doi: 10.1002/pon.3136 [published Online First: 2012/08/01]
- 441 12. Helsedirektoratet. Veileder om pårørende i helse- og omsorgstjenesten. 2017  
442 [Available from: <https://helsedirektoratet.no/Retningslinjer/Pårørendeveileder.pdf>.
- 443 13. Lazarus RS, Folkman S. Stress, appraisal, and coping. New York: Springer 1984.
- 444 14. Sandelowski M, Barroso J. Handbook for synthesizing qualitative research. New York:  
445 Springer 2007.
- 446 15. Ouzzani M, Hammady, H., Fedorowicz, Z., & Elmagarmid, A. . Systematic Reviews  
447 2016 [Available from: <https://rayyan.qcri.org/welcome>.

- 1  
2  
3 448 16. Lindseth A, Norberg A. A phenomenological hermeneutical method for researching  
4 449 lived experience. *Scand J Caring Sci* 2004;18(2):145-53. doi: 10.1111/j.1471-  
5 450 6712.2004.00258.x [published Online First: 2004/05/19]  
6 451  
7 452 17. QSR International. NVIVO 2020 [Available from:  
8 453 <https://www.qsrinternational.com/nvivo-qualitative-data-analysis-software/home>.  
9 454  
10 455 18. Schubart JR, Kinzie MB, Farace E. Caring for the brain tumor patient: family caregiver  
11 456 burden and unmet needs. *Neuro Oncol* 2008;10(1):61-72. doi: 10.1215/15228517-  
12 457 2007-040 [published Online First: 2007/11/13]  
13 458 19. Piil K, Juhler M, Jakobsen J, et al. Daily Life Experiences of Patients With a High-  
14 459 Grade Glioma and Their Caregivers: A Longitudinal Exploration of Rehabilitation  
15 460 and Supportive Care Needs. *J Neurosci Nurs* 2015;47(5):271-84. doi:  
16 461 10.1097/jnn.000000000000158 [published Online First: 2015/09/09]  
17 462 20. Janda M, Eakin EG, Bailey L, et al. Supportive care needs of people with brain  
18 463 tumours and their carers. *Support Care Cancer* 2006;14(11):1094-103. doi:  
19 464 10.1007/s00520-006-0074-1 [published Online First: 2006/05/20]  
20 465 21. Coolbrandt A, Sterckx W, Clement P, et al. Family Caregivers of Patients With a High-  
21 466 Grade Glioma: A Qualitative Study of Their Lived Experience and Needs Related  
22 467 to Professional Care. *Cancer Nurs* 2015;38(5):406-13. doi:  
23 468 10.1097/ncc.0000000000000216 [published Online First: 2014/12/19]  
24 469 22. Arber A, Hutson N, de Vries K, et al. Finding the right kind of support: a study of  
25 470 carers of those with a primary malignant brain tumour. *Eur J Oncol Nurs*  
26 471 2013;17(1):52-8. doi: 10.1016/j.ejon.2012.01.008 [published Online First:  
27 472 2012/03/03]  
28 473 23. Edvardsson T, Ahlström G. Being the next of kin of a person with a low-grade glioma.  
29 474 *Psychooncology* 2008;17(6):584-91. doi: 10.1002/pon.1276 [published Online  
30 475 First: 2007/10/25]  
31 476 24. Wideheim AK, Edvardsson T, Pålsson A, et al. A family's perspective on living with a  
32 477 highly malignant brain tumor. *Cancer Nurs* 2002;25(3):236-44. doi:  
33 478 10.1097/00002820-200206000-00012 [published Online First: 2002/06/01]  
34 479 25. Strang S, Strang P. Spiritual thoughts, coping and 'sense of coherence' in brain tumour  
35 480 patients and their spouses. *Palliat Med* 2001;15(2):127-34. doi:  
36 481 10.1191/026921601670322085 [published Online First: 2001/04/17]  
37 482 26. Shortman RI, Beringer A, Penn A, et al. The experience of mothers caring for a child  
38 483 with a brain tumour. *Child Care Health Dev* 2013;39(5):743-9. doi:  
39 484 10.1111/cch.12005 [published Online First: 2012/09/14]  
40 485 27. Cutillo A, Zimmerman K, Davies S, et al. Coping strategies used by caregivers of  
41 486 children with newly diagnosed brain tumors. *J Neurosurg Pediatr* 2018;23(1):30-  
42 487 39. doi: 10.3171/2018.7.Peds18296 [published Online First: 2018/11/30]  
43 488 28. Schmer C, Ward-Smith P, Latham S, et al. When a family member has a malignant  
44 489 brain tumor: the caregiver perspective. *J Neurosci Nurs* 2008;40(2):78-84. doi:  
45 490 10.1097/01376517-200804000-00006 [published Online First: 2008/05/17]  
46 491 29. Tastan S, Kose G, Iyigun E, et al. Experiences of the relatives of patients undergoing  
47 492 cranial surgery for a brain tumor: a descriptive qualitative study. *J Neurosci Nurs*  
48 493 2011;43(2):77-84. doi: 10.1097/jnn.0b013e31820c94da [published Online First:  
49 494 2011/04/15]  
50 495 30. Zelcer S, Cataudella D, Cairney AE, et al. Palliative care of children with brain tumors:  
51 496 a parental perspective. *Arch Pediatr Adolesc Med* 2010;164(3):225-30. doi:  
52 497 10.1001/archpediatrics.2009.284 [published Online First: 2010/03/03]  
53  
54  
55  
56  
57  
58  
59  
60



- 1  
2  
3 496 31. Lou HL, Mu PF, Wong TT, et al. A Retrospective Study of Mothers' Perspectives of  
4 497 the Lived Experience of Anticipatory Loss of a Child From a Terminal Brain  
5 498 Tumor. *Cancer Nurs* 2015;38(4):298-304. doi: 10.1097/ncc.000000000000178  
6 499 [published Online First: 2014/07/11]  
7  
8 500 32. Ownsworth T, Goadby E, Chambers SK. Support after brain tumor means different  
9 501 things: family caregivers' experiences of support and relationship changes. *Front*  
10 502 *Oncol* 2015;5:33. doi: 10.3389/fonc.2015.00033 [published Online First:  
11 503 2015/03/03]  
12 504 33. Hricik A, Donovan H, Bradley SE, et al. Changes in caregiver perceptions over time in  
13 505 response to providing care for a loved one with a primary malignant brain tumor.  
14 506 *Oncol Nurs Forum* 2011;38(2):149-55. doi: 10.1188/11.Onf.149-155 [published  
15 507 Online First: 2011/03/02]  
16 508 34. Lipsman N, Skanda A, Kimmelman J, et al. The attitudes of brain cancer patients and  
17 509 their caregivers towards death and dying: a qualitative study. *BMC Palliat Care*  
18 510 2007;6:7. doi: 10.1186/1472-684x-6-7 [published Online First: 2007/11/13]  
19 511 35. Lazarus RS. Stress og følelser: en syntese. København: Akademisk Forlag 2006.  
20 512 36. Lin IF, Fee HR, Wu HS. NEGATIVE AND POSITIVE CAREGIVING  
21 513 EXPERIENCES: A CLOSER LOOK AT THE INTERSECTION OF GENDER  
22 514 AND RELATIOSHIPS. *Fam Relat* 2012;61(2):343-58. doi: 10.1111/j.1741-  
23 515 3729.2011.00692.x [published Online First: 2012/05/01]  
24 516 37. Daniela Doulavince A, Altamira Pereira da Silva R, Regina Aparecida Garcia de L, et  
25 517 al. Conceptions of care and feelings of the caregiver of children with  
26 518 cancer/Concepções de cuidado e sentimentos do cuidador de crianças com câncer.  
27 519 *Acta paulista de enfermagem* 2013;26(6):542.  
28 520 38. Nicklin E, Velikova G, Hulme C, et al. Long-term issues and supportive care needs of  
29 521 adolescent and young adult childhood brain tumour survivors and their caregivers:  
30 522 A systematic review. *Psychooncology* 2019;28(3):477-87. doi: 10.1002/pon.4989  
31 523 [published Online First: 2019/01/19]  
32 524 39. Sterckx W, Coolbrandt A, Dierckx de Casterlé B, et al. The impact of a high-grade  
33 525 glioma on everyday life: a systematic review from the patient's and caregiver's  
34 526 perspective. *Eur J Oncol Nurs* 2013;17(1):107-17. doi: 10.1016/j.ejon.2012.04.006  
35 527 [published Online First: 2012/06/05]  
36 528 40. Holtslander LF, Duggleby W, Williams AM, et al. The experience of hope for informal  
37 529 caregivers of palliative patients. *J Palliat Care* 2005;21(4):285-91. [published  
38 530 Online First: 2006/02/18]  
39 531 41. Leite A, Garcia-Vivar C, Neris RR, et al. The experience of hope in families of  
40 532 children and adolescents living with chronic illness: A thematic synthesis of  
41 533 qualitative studies. *J Adv Nurs* 2019;75(12):3246-62. doi: 10.1111/jan.14129  
42 534 [published Online First: 2019/06/27]  
43 535 42. Lina Mahayati S, Allenidekania, Happy H. Spirituality in adolescents with cancer.  
44 536 *Enferm Clin* 2018;28 Suppl 1:31-35. doi: 10.1016/s1130-8621(18)30032-9  
45 537 [published Online First: 2018/04/14]  
46 538 43. Alidina K, Tettero I. Exploring the therapeutic value of hope in palliative nursing.  
47 539 *Palliat Support Care* 2010;8(3):353-8. doi: 10.1017/s1478951510000155  
48 540 [published Online First: 2010/09/30]  
49 541 44. Wang SC, Wu LM, Yang YM, et al. The experience of parents living with a child with  
50 542 cancer at the end of life. *Eur J Cancer Care (Engl)* 2019;28(4):e13061. doi:  
51 543 10.1111/ecc.13061 [published Online First: 2019/04/25]  
52  
53  
54  
55  
56  
57  
58  
59  
60

- 1  
2  
3 544 45. Hisamatsu M, & Niwa, S. . Support factors of coping with anxiety in families of  
4 545 patients with terminal cancer. *Journal of Japan Academy of Nursing Science*  
5 546 2011;31(1):58-67. doi: 10.5630/jans.31.1\_58  
6 547 46. Aromataris EM, Z (Eds.). Joanna Briggs Institute Reviewer's Manual 2017 [Available  
7 548 from:  
8 549 <https://wiki.joannabriggs.org/display/MANUAL/JBI+Reviewer%27s+Manual>  
9 550 47. Salander P. Brain tumor as a threat to life and personality: The spouse's perspective.  
10 551 *Journal of Psychosocial Oncology* 1996;14(3):1-18.  
11  
12  
13 552  
14  
15  
16  
17  
18  
19  
20  
21  
22  
23  
24  
25  
26  
27  
28  
29  
30  
31  
32  
33  
34  
35  
36  
37  
38  
39  
40  
41  
42  
43  
44  
45  
46  
47  
48  
49  
50  
51  
52  
53  
54  
55  
56  
57  
58  
59  
60

For peer review only

1  
2  
3  
4  
5  
6  
7  
8  
9  
10  
11  
12  
13  
14  
15  
16  
17  
18  
19  
20  
21  
22  
23  
24  
25  
26  
27  
28  
29  
30  
31  
32  
33  
34  
35  
36  
37  
38  
39  
40  
41  
42  
43  
44  
45  
46

553  
554

**Table 1: Characteristics of the included studies.**

| Author/year/country                                        | Focus                                                                                      | Type of brain tumor and stage of treatment at interview                                   | Recruitment                                         | Participants, sex, and relationship                               | Method/design               | Data collection/analysis                                                                         |
|------------------------------------------------------------|--------------------------------------------------------------------------------------------|-------------------------------------------------------------------------------------------|-----------------------------------------------------|-------------------------------------------------------------------|-----------------------------|--------------------------------------------------------------------------------------------------|
| Arber et al. (2010). <sup>3</sup><br>United Kingdom (UK).  | Caregivers' need for information.                                                          | Malignant.<br>Stage of treatment not described.                                           | Specialist hospital in England.                     | N = 22<br>M: 7 and F: 15<br>17 spouses<br>3 children<br>2 parents | Grounded theory.            | Semistructured interview/comparative method for generating categories and topics.                |
| Arber et al. (2013). <sup>22</sup><br>United Kingdom (UK). | Caregivers' need for support.                                                              | Malignant.<br>Stage of treatment not described.                                           | Recruited by a nurse at a cancer center in England. | N = 22<br>M: 7 and F: 15<br>17 spouses<br>3 children<br>2 parents | Grounded theory.            | Semistructured interview/comparative method for generating categories and topics.                |
| Coolbrandt et al. (2015). <sup>21</sup> Belgium.           | Caregivers' experience and need for support.                                               | High-grade.<br>Radiation or chemotherapy, or in the follow-up phase after such treatment. | University Hospital in Leuven.                      | N = 16<br>M: 6 and F: 10<br>13 partners<br>2 parents<br>1 friend  | Grounded theory.            | Semistructured interview/thematic analysis inspired by the Qualitative Analysis Guide of Leuven. |
| Cutillo et al. (2018). <sup>27</sup><br>USA.               | Which strategies caregivers of children with a brain tumor use in the postoperative phase. | 15 benign.<br>25 malignant.<br>Newly diagnosed and newly operated.                        | Pediatric hospital in the USA.                      | N = 22<br>M: 3 and F: 19<br>All parents                           | Triangulating mixed-method. | Semistructured interview/thematic analysis.                                                      |

|                                                                                                                            |                                                     |                                                                                                          |                                                                                                                                             |                                                                  |                                                                                                                           |                |                                                                                                                                            |
|----------------------------------------------------------------------------------------------------------------------------|-----------------------------------------------------|----------------------------------------------------------------------------------------------------------|---------------------------------------------------------------------------------------------------------------------------------------------|------------------------------------------------------------------|---------------------------------------------------------------------------------------------------------------------------|----------------|--------------------------------------------------------------------------------------------------------------------------------------------|
| 1<br>2<br>3<br>4<br>5<br>6<br>7<br>8<br>9<br>10<br>11<br>12<br>13<br>14<br>15<br>16                                        | Edvardson & Ahlström (2008) <sup>23</sup> . Sweden. | Caregivers' experience.                                                                                  | 25 low-grade.<br>2 high-grade.<br>Stage of treatment not described.                                                                         | The patients had participated in an earlier study.               | N = 28<br>M: 8 and F: 20<br>15 partners, living together<br>3 partners, living apart<br>8 parents<br>1 sibling<br>1 child | Not described. | Semistructured interview/qualitative content analysis and quantitative analysis of how the topics were distributed among the participants. |
| 17<br>18<br>19<br>20<br>21<br>22<br>23<br>24<br>25                                                                         | Janda et al. (2006) <sup>20</sup> . Australia.      | The need of support for brain tumor patients and their caregivers.                                       | Different types.<br>Treatment phase not described, but time since diagnosis stated:<br>1–2 years: 22<br>5 years: 5<br>More than 5 years: 11 | Members of Queensland Cancer Fund's Brain Tumor Support Service. | N = 10 in focus group, n = 8 in semistructured interview<br>M: 4 and F: 18<br>13 partners<br>5 children                   | Qualitative.   | Focus group interview and semistructured interview/framework analysis.                                                                     |
| 26<br>27<br>28<br>29<br>30<br>31<br>32<br>33<br>34<br>35<br>36<br>37<br>38<br>39<br>40<br>41<br>42<br>43<br>44<br>45<br>46 | Lipsman et al. (2007) <sup>34</sup> . Canada.       | The experience of brain tumor patients and their caregivers, and how it affects the choice of treatment. | Malignant.<br>Palliative phase.                                                                                                             | Recruited by a neurosurgeon.                                     | N = 22<br>Further participant information not described                                                                   | Qualitative.   | Semistructured interview/thematic analysis.                                                                                                |

1  
2  
3  
4  
5  
6  
7  
8  
9  
10  
11  
12  
13  
14  
15  
16  
17  
18  
19  
20  
21  
22  
23  
24  
25  
26  
27  
28  
29  
30  
31  
32  
33  
34  
35  
36  
37  
38  
39  
40  
41  
42  
43  
44  
45  
46

|                                                          |                                                                                                               |                                                                                                                                                                                                       |                                               |                                                                                                    |                                      |                                                       |
|----------------------------------------------------------|---------------------------------------------------------------------------------------------------------------|-------------------------------------------------------------------------------------------------------------------------------------------------------------------------------------------------------|-----------------------------------------------|----------------------------------------------------------------------------------------------------|--------------------------------------|-------------------------------------------------------|
| <p>Lou et al. (2015).<sup>31</sup> Taiwan.</p>           | <p>The experience and suffering of mothers waiting for their child to die from brain tumor.</p>               | <p>Malignant.<br/>All patients deceased.</p>                                                                                                                                                          | <p>Not described.</p>                         | <p>N =10<br/>F: 10<br/>All mothers</p>                                                             | <p>Phenomenological.</p>             | <p>In-depth interview/Colaizzi’s analysis method.</p> |
| <p>Owensworth et al. (2015).<sup>32</sup> Australia.</p> | <p>Caregivers’ experience of support.</p>                                                                     | <p>6 low-grade.<br/>5 high-grade.<br/>All underwent surgery and radiation or chemotherapy.<br/>9 months – 22 years since diagnosis.</p>                                                               | <p>Had participated in a different study.</p> | <p>N = 11<br/>M: 6 and F: 5<br/>8 spouses<br/>3 parents</p>                                        | <p>Phenomenological.</p>             | <p>Semistructured interview/thematic analysis.</p>    |
| <p>Piil et al. (2015).<sup>19</sup> Denmark.</p>         | <p>Brain tumor patients’ and their caregivers’ experience, and their need for rehabilitation and support.</p> | <p>High-grade.<br/>The interviews conducted after:<br/>1. Surgical diagnosis<br/>2. Oncological treatment<br/>3,4. Oncological treatment and scan showing treatment effect<br/>5. After treatment</p> | <p>The University Hospital in Copenhagen.</p> | <p>N = 33<br/>M: 10 and F: 23<br/>23 spouses<br/>2 girl/boyfriends<br/>7 children<br/>1 sister</p> | <p>Longitudinal and exploratory.</p> | <p>Semistructured interview/thematic analysis.</p>    |

|                                                 |                                                                                |                                                                                                                                        |                                 |                                                                                |                                  |                                                               |
|-------------------------------------------------|--------------------------------------------------------------------------------|----------------------------------------------------------------------------------------------------------------------------------------|---------------------------------|--------------------------------------------------------------------------------|----------------------------------|---------------------------------------------------------------|
| Russell et al. (2016) <sup>8</sup> .<br>Canada. | The experience of children with a brain tumor and their caregivers.            | Malignant.<br>Diagnosed at least 3 months previously, stage of treatment not described.                                                | Hospital in Toronto.            | N = 12<br>Based on names:<br>F: 11 stk., 1 stk. unknown<br>All parents         | Grounded theory.                 | Semistructured interview/comparative analysis.                |
| Schmer et al. (2008) <sup>28</sup> . USA.       | Caregivers' experience concerning care tasks after chemotherapy.               | Malignant.<br>During first 6 months of treatment.                                                                                      | The patients' treatment center. | N = 10<br>Sex unknown<br>7 spouses<br>2 daughters<br>1 son-in-law              | Phenomenological.                | Semistructured interview/Colaizzi's analysis method.          |
| Schubart et al. (2008). <sup>18</sup> USA.      | Caregivers' challenges and unmet needs.                                        | Different types of brain cancer.<br>6 deceased<br>2 exacerbations<br>2 unstable<br>10 stable<br>1 terminal<br>3 recurrent<br>1 unclear | NeuroOncology Center.           | N = 25<br>M: 7 and F: 18<br>18 spouses<br>4 parents<br>2 children<br>1 sibling | Grounded theory.                 | Semistructured interview/open coding and cross-case analysis. |
| Sherwood et al. (2011). <sup>33</sup> USA.      | How caregivers adapt to their new role, and how this role changes during time. | Malignant.<br>Interviewed 1 and 4 months after diagnosis.                                                                              | A regional hospital.            | N = 10<br>M: 2 and F: 8<br>5 spouses<br>2 parents                              | Longitudinal descriptive design. | Semistructured interview/thematic content analysis.           |

1  
2  
3  
4  
5  
6  
7  
8  
9  
10  
11  
12  
13  
14  
15  
16  
17  
18  
19  
20  
21  
22  
23  
24  
25  
26  
27  
28  
29  
30  
31  
32  
33  
34  
35  
36  
37  
38  
39  
40  
41  
42  
43  
44  
45  
46

|                                               |                                                                                                                             |                                                                                                                                |                                                      |                                                                             |                                |                                                                                                |
|-----------------------------------------------|-----------------------------------------------------------------------------------------------------------------------------|--------------------------------------------------------------------------------------------------------------------------------|------------------------------------------------------|-----------------------------------------------------------------------------|--------------------------------|------------------------------------------------------------------------------------------------|
|                                               |                                                                                                                             |                                                                                                                                |                                                      | 1 child<br>1 nephew<br>1 friend                                             |                                |                                                                                                |
| Shortman et al. (2013). United Kingdom (UK).  | Mothers of children with brain tumor—their experience and their coping mechanisms.                                          | Different types and degrees.<br>All underwent surgery, five radiation, and four chemotherapy.<br>17–35 months since diagnosis. | Also participated in another study.                  | N = 6<br>F: 6<br>All mothers.                                               | Not described.                 | Semistructured interview/thematic content analysis.                                            |
| Strang & Strang (2001). <sup>25</sup> Sweden. | The degree to which patients with a brain tumor and their caregivers cope, understand, and create meaning in the situation. | Malignant tumors, grade 2–4.<br>Treatment stage not described.                                                                 | Not described.                                       | N = 16<br>Further participant information not described.                    | Hermeneutic phenomenological.  | Semistructured interview/structural analysis based on hermeneutic circle described by Ricoeur. |
| Tastan et al. (2011). <sup>29</sup> Turkey.   | Caregivers’ experience of postoperative phase and homecare.                                                                 | Different types and degrees.<br>All patients had undergone surgery and postoperative treatment and were being treated at home. | A research and military training hospital in Turkey. | N = 19<br>M: 4 and F: 6<br>4 spouses<br>4 children<br>1 parent<br>1 sibling | Descriptive qualitative study. | Semistructured interview/Colaizzi’s analysis method.                                           |

|                                               |                                                                                |                                                                                                        |                                                     |                                                                 |                                |                                                     |
|-----------------------------------------------|--------------------------------------------------------------------------------|--------------------------------------------------------------------------------------------------------|-----------------------------------------------------|-----------------------------------------------------------------|--------------------------------|-----------------------------------------------------|
| Wideheim et al. (2002). <sup>24</sup> Sweden. | The experience of a brain tumor from a family perspective.                     | High-grade glioma.<br>The interviews were conducted 2–3 weeks, 3 months, and 6 months postoperatively. | Not described.                                      | N = 5<br>Sex unknown<br>2 spouses<br>2 parents<br>1 adult child | Descriptive qualitative study. | Qualitative interviews/inductive content analysis.  |
| Zelcer et al. (2010). <sup>30</sup> Canada.   | The experience of brain tumor patients and caregivers in the palliative phase. | Malignant.<br>All patients deceased.                                                                   | Children's Hospital, London Health Sciences Centre. | N = 25<br>M: 9 and F: 16<br>All parents                         | Qualitative                    | Semistructured interview/thematic content analysis. |

555

556

557 1 M = Male, F = Female



1  
2  
3  
4  
5  
6  
7  
8  
9  
10  
11  
12  
13  
14  
15  
16  
17  
18  
19  
20  
21  
22  
23  
24  
25  
26  
27  
28  
29  
30  
31  
32  
33  
34  
35  
36  
37  
38  
39  
40  
41  
42  
43  
44  
45  
46

**Table 2: Critical appraisal of the included studies.**

| Criterion<br>Y = yes<br>N = no<br>C = can't tell<br>V = valuable<br>NV = not valuable | 1. Was there a clear statement of the aims? | 2. Is a qualitative methodology appropriate? | 3. Was the research design appropriate? | 4. Was the recruitment strategy appropriate? | 5. Were the data collected in a way that addressed the research issue? | 6. Has the relationship between researcher and participants been adequately considered? | 7. Have ethical issues been taken into consideration? | 8. Was the data analysis sufficiently rigorous? | 9. Is there a clear statement of findings? | 10. How valuable is the research? | Impact factor |
|---------------------------------------------------------------------------------------|---------------------------------------------|----------------------------------------------|-----------------------------------------|----------------------------------------------|------------------------------------------------------------------------|-----------------------------------------------------------------------------------------|-------------------------------------------------------|-------------------------------------------------|--------------------------------------------|-----------------------------------|---------------|
| Arber et al. (2010) <sup>3</sup>                                                      | Y                                           | Y                                            | C                                       | C                                            | Y                                                                      | N                                                                                       | Y                                                     | C                                               | Y                                          | V                                 | Not found     |
| Arber et al. (2013) <sup>22</sup>                                                     | Y                                           | Y                                            | Y                                       | Y                                            | Y                                                                      | N                                                                                       | Y                                                     | Y                                               | Y                                          | V                                 | 1.697         |
| Coolbrant et al. (2015) <sup>21</sup>                                                 | Y                                           | Y                                            | Y                                       | Y                                            | Y                                                                      | C                                                                                       | Y                                                     | Y                                               | Y                                          | V                                 | 2.022         |
| Cutillo et al. (2018) <sup>27</sup>                                                   | Y                                           | Y                                            | Y                                       | Y                                            | Y                                                                      | Y                                                                                       | N                                                     | Y                                               | C                                          | V                                 | 2.170         |
| Edvardsson & Ahlström (2008) <sup>23</sup>                                            | Y                                           | Y                                            | Y                                       | Y                                            | Y                                                                      | N                                                                                       | N                                                     | Y                                               | Y                                          | V                                 | 3.470         |
| Janda et al. (2006) <sup>20</sup>                                                     | Y                                           | Y                                            | Y                                       | Y                                            | Y                                                                      | N                                                                                       | Y                                                     | Y                                               | Y                                          | V                                 | 2.754         |
| Lipsman et al. (2007) <sup>34</sup>                                                   | Y                                           | Y                                            | Y                                       | Y                                            | Y                                                                      | N                                                                                       | Y                                                     | Y                                               | Y                                          | V                                 | 2.922         |
| Lou et al. (2015) <sup>31</sup>                                                       | C                                           | Y                                            | Y                                       | C                                            | Y                                                                      | N                                                                                       | N                                                     | C                                               | Y                                          | V                                 | 2.022         |
| Owensworth et al. (2015) <sup>32</sup>                                                | Y                                           | Y                                            | Y                                       | Y                                            | Y                                                                      | C                                                                                       | C                                                     | Y                                               | Y                                          | V                                 | 4.137         |
| Piil et al. (2015) <sup>19</sup>                                                      | Y                                           | Y                                            | Y                                       | Y                                            | Y                                                                      | C                                                                                       | Y                                                     | Y                                               | Y                                          | V                                 | 1.096         |
| Russel et al. (2016) <sup>8</sup>                                                     | Y                                           | Y                                            | Y                                       | Y                                            | Y                                                                      | N                                                                                       | Y                                                     | Y                                               | Y                                          | V                                 | 1.197         |

|                                      |   |   |   |   |   |   |   |   |   |   |       |
|--------------------------------------|---|---|---|---|---|---|---|---|---|---|-------|
| Schmer et al. (2008) <sup>28</sup>   | Y | Y | N | Y | N | N | Y | N | Y | V | 1.096 |
| Schubart et al. (2008) <sup>18</sup> | C | Y | Y | Y | Y | N | N | Y | Y | V | 3.470 |
| Sherwood et al. (2011) <sup>33</sup> | Y | Y | Y | Y | C | Y | N | Y | N | V | 1.438 |
| Shortman et al. (2013)               | Y | Y | Y | C | C | N | Y | N | Y | V | 1.918 |
| Strang & Strang (2001) <sup>25</sup> | C | C | Y | N | Y | N | Y | Y | Y | V | 4.956 |
| Tastan et al. (2011) <sup>29</sup>   | Y | Y | N | Y | Y | N | Y | N | Y | V | 1.096 |
| Wideheim et al. (2002) <sup>24</sup> | Y | Y | Y | Y | Y | N | C | Y | Y | V | 2.022 |
| Zelcer et al. (2010) <sup>30</sup>   | Y | Y | Y | Y | Y | N | C | Y | Y | V | 5.731 |

**Table 3: Thematic overview showing the studies' contribution to the different themes and subthemes.**

| Author                                    | Coping factors           |            |                  |                   |              | Coping mechanisms |       |        |
|-------------------------------------------|--------------------------|------------|------------------|-------------------|--------------|-------------------|-------|--------|
|                                           | Personal characteristics | Meaningful | External support | Hope and religion | Interlocutor | Gain control      | Fight | Accept |
| Arber et al. (2010) <sup>3</sup>          |                          |            | V                | V                 | V            |                   |       |        |
| Arber et al. (2013) <sup>22</sup>         |                          |            | V                |                   | V            |                   |       |        |
| Coolbrandt et al. (2015) <sup>21</sup>    |                          | V          | V                | V                 | V            | V                 |       |        |
| Cutillo et al. (2018) <sup>27</sup>       |                          |            | V                | V                 | V            | V                 |       | V      |
| Edvardson & Ahlström (2008) <sup>23</sup> | V                        | V          | V                | V                 | V            | V                 | V     |        |
| Janda et al. (2006) <sup>20</sup>         |                          |            | V                | V                 | V            | V                 |       |        |
| Lipsman et al. (2007) <sup>34</sup>       | V                        |            |                  | V                 | V            | V                 |       |        |
| Lou et al. (2015) <sup>31</sup>           |                          |            | V                | V                 | V            | V                 | V     | V      |
| Owensworth et al. (2015) <sup>32</sup>    |                          | V          | V                |                   | V            | V                 |       |        |
| Piil et al. (2015) <sup>19</sup>          |                          | V          | V                | V                 | V            | V                 | V     |        |
| Russell et al. (2016) <sup>8</sup>        |                          |            | V                | V                 |              | V                 | V     | V      |
| Schmer et al. (2008) <sup>28</sup>        |                          | V          | V                |                   | V            |                   |       | V      |
| Schubart et al. (2008) <sup>18</sup>      |                          | V          | V                | V                 |              | V                 |       |        |
| Sherwood et al. (2011) <sup>33</sup>      |                          |            |                  |                   | V            | V                 |       | V      |
| Shortman et al. (2013) <sup>33</sup>      | V                        | V          | V                |                   |              | V                 |       |        |
| Strang & Strang (2001) <sup>25</sup>      |                          | V          | V                |                   |              |                   |       | V      |

|                                      |  |  |   |   |   |   |   |   |
|--------------------------------------|--|--|---|---|---|---|---|---|
| Tastan et al. (2011) <sup>29</sup>   |  |  | V |   |   | V |   |   |
| Wideheim et al. (2002) <sup>24</sup> |  |  | V | V | V |   | V | V |
| Zelcer et al. (2010) <sup>30</sup>   |  |  | V | V |   | V |   | V |

For peer review only

1  
2  
3  
4  
5  
6  
7  
8  
9  
10  
11  
12  
13  
14  
15  
16  
17  
18  
19  
20  
21  
22  
23  
24  
25  
26  
27  
28  
29  
30  
31  
32  
33  
34  
35  
36  
37  
38  
39  
40  
41  
42  
43  
44  
45  
46  
47  
48  
49  
50  
51  
52  
53  
54  
55  
56  
57  
58  
59  
60

For peer review only

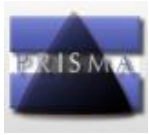

## PRISMA 2009 Flow Diagram

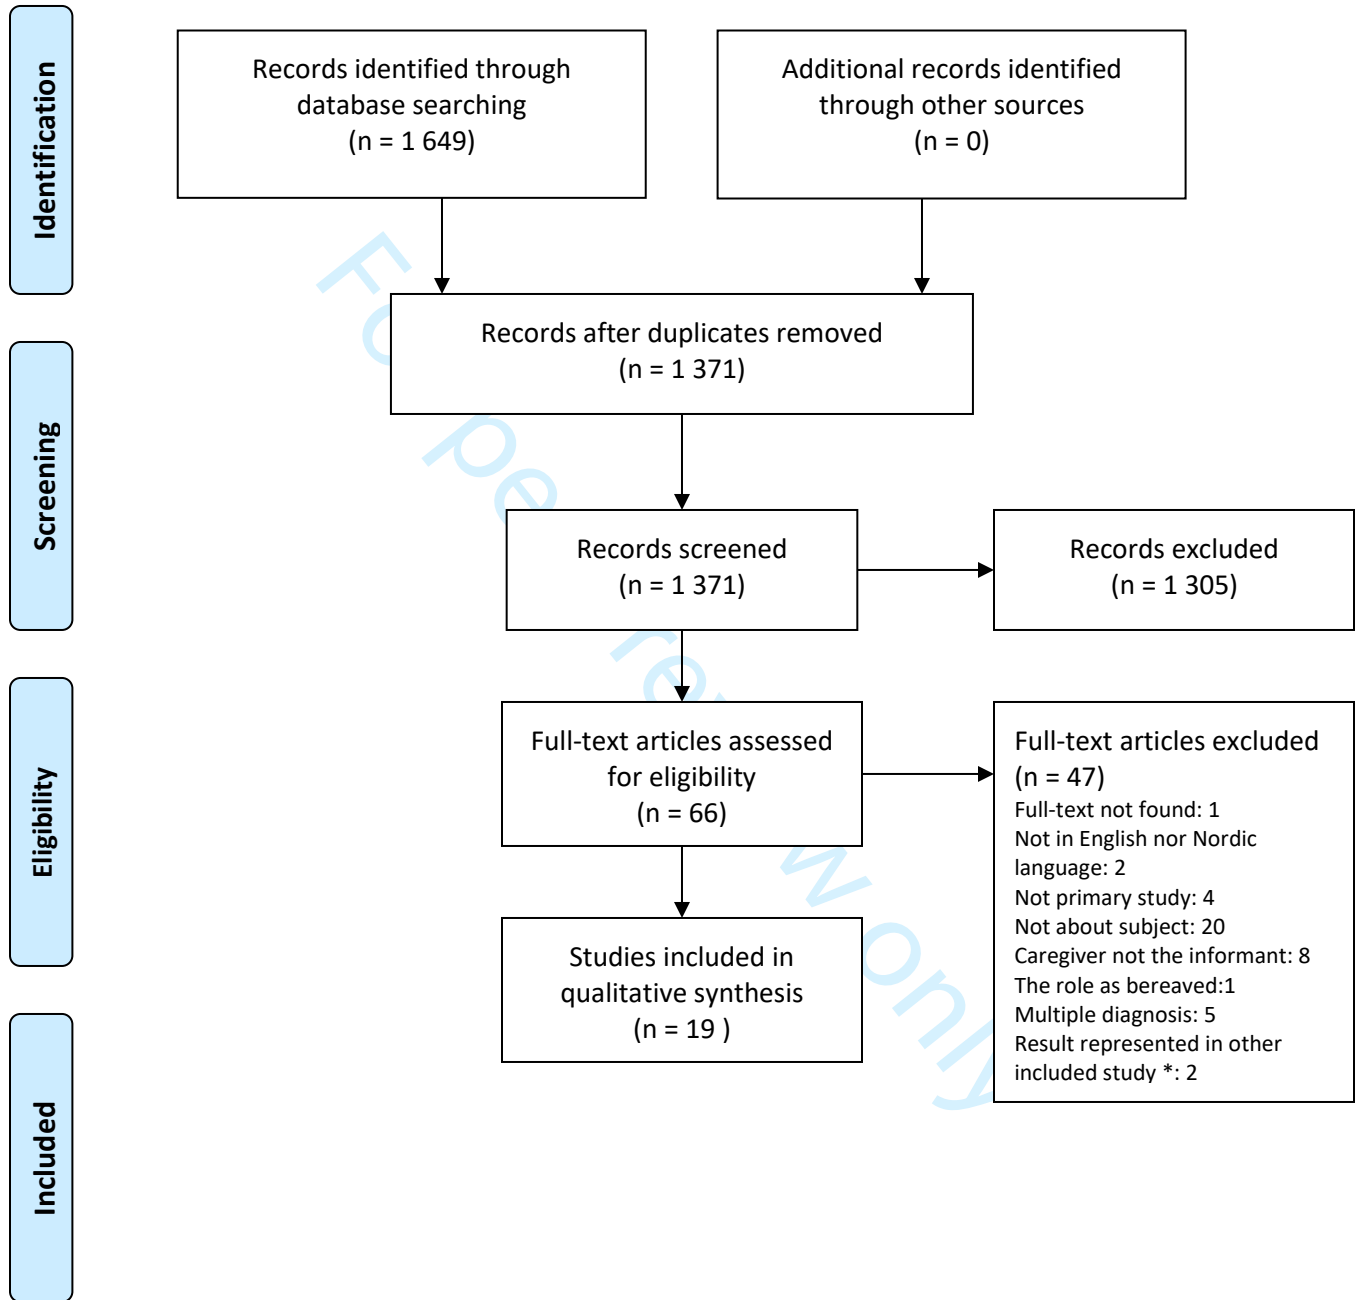

Figure 1. Flow chart of the inclusion process

From: Moher D, Liberati A, Tetzlaff J, Altman DG, The PRISMA Group (2009). Preferred Reporting Items for Systematic Reviews and Meta-Analyses: The PRISMA Statement. PLoS Med 6(7): e1000097. doi:10.1371/journal.pmed1000097

For more information, visit [www.prisma-statement.org](http://www.prisma-statement.org).

For peer review only - <http://bmjopen.bmj.com/site/about/guidelines.xhtml>

PRISMA NMA Checklist of Items to Include When Reporting A Systematic Review Involving a Network Meta-analysis

| Section/Topic             | Item # | Checklist Item                                                                                                                                                                                                                                                                                                                                                                                                                                                                                                                                                                                                                                                                                                                                                                          | Reported on Page # |
|---------------------------|--------|-----------------------------------------------------------------------------------------------------------------------------------------------------------------------------------------------------------------------------------------------------------------------------------------------------------------------------------------------------------------------------------------------------------------------------------------------------------------------------------------------------------------------------------------------------------------------------------------------------------------------------------------------------------------------------------------------------------------------------------------------------------------------------------------|--------------------|
| <b>TITLE</b>              |        |                                                                                                                                                                                                                                                                                                                                                                                                                                                                                                                                                                                                                                                                                                                                                                                         |                    |
| Title                     | 1      | Identify the report as a systematic review <i>incorporating a network meta-analysis (or related form of meta-analysis)</i> .                                                                                                                                                                                                                                                                                                                                                                                                                                                                                                                                                                                                                                                            | 1                  |
| <b>ABSTRACT</b>           |        |                                                                                                                                                                                                                                                                                                                                                                                                                                                                                                                                                                                                                                                                                                                                                                                         |                    |
| Structured summary        | 2      | Provide a structured summary including, as applicable:<br><b>Background:</b> main objectives<br><b>Methods:</b> data sources; study eligibility criteria, participants, and interventions; study appraisal; and <i>synthesis methods, such as network meta-analysis</i> .<br><b>Results:</b> number of studies and participants identified; summary estimates with corresponding confidence/credible intervals; <i>treatment rankings may also be discussed. Authors may choose to summarize pairwise comparisons against a chosen treatment included in their analyses for brevity.</i><br><b>Discussion/Conclusions:</b> limitations; conclusions and implications of findings.<br><b>Other:</b> primary source of funding; systematic review registration number with registry name. | 1-2                |
| <b>INTRODUCTION</b>       |        |                                                                                                                                                                                                                                                                                                                                                                                                                                                                                                                                                                                                                                                                                                                                                                                         |                    |
| Rationale                 | 3      | Describe the rationale for the review in the context of what is already known, <i>including mention of why a network meta-analysis has been conducted</i> .                                                                                                                                                                                                                                                                                                                                                                                                                                                                                                                                                                                                                             | 3-4                |
| Objectives                | 4      | Provide an explicit statement of questions being addressed, with reference to participants, interventions, comparisons, outcomes, and study design (PICOS).                                                                                                                                                                                                                                                                                                                                                                                                                                                                                                                                                                                                                             | 4                  |
| <b>METHODS</b>            |        |                                                                                                                                                                                                                                                                                                                                                                                                                                                                                                                                                                                                                                                                                                                                                                                         |                    |
| Protocol and registration | 5      | Indicate whether a review protocol exists and if and where it can be accessed (e.g., Web address); and, if available, provide registration information, including registration number.                                                                                                                                                                                                                                                                                                                                                                                                                                                                                                                                                                                                  | n.a                |
| Eligibility criteria      | 6      | Specify study characteristics (e.g., PICOS, length of follow-up) and report characteristics (e.g., years considered, language, publication status) used as criteria for eligibility, giving rationale. <i>Clearly describe eligible treatments included in the treatment network, and note whether any have been clustered or merged into the same node (with justification)</i> .                                                                                                                                                                                                                                                                                                                                                                                                      | 6                  |
| Information sources       | 7      | Describe all information sources (e.g., databases with dates of coverage, contact with study authors to identify additional studies) in the search and date last searched.                                                                                                                                                                                                                                                                                                                                                                                                                                                                                                                                                                                                              | 5-6                |
| Search                    | 8      | Present full electronic search strategy for at least one database, including any limits used, such that it could be repeated.                                                                                                                                                                                                                                                                                                                                                                                                                                                                                                                                                                                                                                                           | 5-6                |
| Study selection           | 9      | State the process for selecting studies (i.e., screening, eligibility, included in systematic review, and, if applicable,                                                                                                                                                                                                                                                                                                                                                                                                                                                                                                                                                                                                                                                               | 6-7                |

|  |                                        |                                                                                                                                                                                                                                                                                                                                                                                                                                                      |            |
|--|----------------------------------------|------------------------------------------------------------------------------------------------------------------------------------------------------------------------------------------------------------------------------------------------------------------------------------------------------------------------------------------------------------------------------------------------------------------------------------------------------|------------|
|  |                                        | included in the meta-analysis).                                                                                                                                                                                                                                                                                                                                                                                                                      |            |
|  | Data collection process                | 10 Describe method of data extraction from reports (e.g., piloted forms, independently, in duplicate) and any processes for obtaining and confirming data from investigators.                                                                                                                                                                                                                                                                        | 7-8        |
|  | Data items                             | 11 List and define all variables for which data were sought (e.g., PICOS, funding sources) and any assumptions and simplifications made.                                                                                                                                                                                                                                                                                                             | 5-6        |
|  | <b>Geometry of the network</b>         | <b>S1</b> Describe methods used to explore the geometry of the treatment network under study and potential biases related to it. This should include how the evidence base has been graphically summarized for presentation, and what characteristics were compiled and used to describe the evidence base to readers.                                                                                                                               | <b>6</b>   |
|  | Risk of bias within individual studies | 12 Describe methods used for assessing risk of bias of individual studies (including specification of whether this was done at the study or outcome level), and how this information is to be used in any data synthesis.                                                                                                                                                                                                                            | 7          |
|  | Summary measures                       | 13 State the principal summary measures (e.g., risk ratio, difference in means). <i>Also describe the use of additional summary measures assessed, such as treatment rankings and surface under the cumulative ranking curve (SUCRA) values, as well as modified approaches used to present summary findings from meta-analyses.</i>                                                                                                                 | n.a        |
|  | Planned methods of analysis            | 14 Describe the methods of handling data and combining results of studies for each network meta-analysis. This should include, but not be limited to: <ul style="list-style-type: none"> <li>• <i>Handling of multi-arm trials;</i></li> <li>• <i>Selection of variance structure;</i></li> <li>• <i>Selection of prior distributions in Bayesian analyses; and</i></li> <li>• <i>Assessment of model fit.</i></li> </ul>                            | 7-8        |
|  | <b>Assessment of Inconsistency</b>     | <b>S2</b> Describe the statistical methods used to evaluate the agreement of direct and indirect evidence in the treatment network(s) studied. Describe efforts taken to address its presence when found.                                                                                                                                                                                                                                            | n.a        |
|  | Risk of bias across studies            | 15 Specify any assessment of risk of bias that may affect the cumulative evidence (e.g., publication bias, selective reporting within studies).                                                                                                                                                                                                                                                                                                      | <b>n.a</b> |
|  | Additional analyses                    | 16 Describe methods of additional analyses if done, indicating which were pre-specified. This may include, but not be limited to, the following: <ul style="list-style-type: none"> <li>• Sensitivity or subgroup analyses;</li> <li>• Meta-regression analyses;</li> <li>• <i>Alternative formulations of the treatment network; and</i></li> <li>• <i>Use of alternative prior distributions for Bayesian analyses (if applicable).</i></li> </ul> | <b>n.a</b> |



**RESULTS†**

|                                          |           |                                                                                                                                                                                                                                                                                                                                                                                                                                                              |                         |
|------------------------------------------|-----------|--------------------------------------------------------------------------------------------------------------------------------------------------------------------------------------------------------------------------------------------------------------------------------------------------------------------------------------------------------------------------------------------------------------------------------------------------------------|-------------------------|
| Study selection                          | 17        | Give numbers of studies screened, assessed for eligibility, and included in the review, with reasons for exclusions at each stage, ideally with a flow diagram.                                                                                                                                                                                                                                                                                              | 6-7, 9-10               |
| <b>Presentation of network structure</b> | <b>S3</b> | Provide a network graph of the included studies to enable visualization of the geometry of the treatment network.                                                                                                                                                                                                                                                                                                                                            | <b>6-7 and Figure 1</b> |
| <b>Summary of network geometry</b>       | <b>S4</b> | Provide a brief overview of characteristics of the treatment network. This may include commentary on the abundance of trials and randomized patients for the different interventions and pairwise comparisons in the network, gaps of evidence in the treatment network, and potential biases reflected by the network structure.                                                                                                                            | <b>n.a</b>              |
| Study characteristics                    | 18        | For each study, present characteristics for which data were extracted (e.g., study size, PICOS, follow-up period) and provide the citations.                                                                                                                                                                                                                                                                                                                 | 9                       |
| Risk of bias within studies              | 19        | Present data on risk of bias of each study and, if available, any outcome level assessment.                                                                                                                                                                                                                                                                                                                                                                  | n.a                     |
| Results of individual studies            | 20        | For all outcomes considered (benefits or harms), present, for each study: 1) simple summary data for each intervention group, and 2) effect estimates and confidence intervals. <i>Modified approaches may be needed to deal with information from larger networks.</i>                                                                                                                                                                                      | <b>n.a</b>              |
| Synthesis of results                     | 21        | Present results of each meta-analysis done, including confidence/credible intervals. <i>In larger networks, authors may focus on comparisons versus a particular comparator (e.g. placebo or standard care), with full findings presented in an appendix. League tables and forest plots may be considered to summarize pairwise comparisons.</i> If additional summary measures were explored (such as treatment rankings), these should also be presented. |                         |
| <b>Exploration for inconsistency</b>     | <b>S5</b> | Describe results from investigations of inconsistency. This may include such information as measures of model fit to compare consistency and inconsistency models, <i>P</i> values from statistical tests, or summary of inconsistency estimates from different parts of the treatment network.                                                                                                                                                              | <b>n.a</b>              |
| Risk of bias across studies              | 22        | Present results of any assessment of risk of bias across studies for the evidence base being studied.                                                                                                                                                                                                                                                                                                                                                        | n.a                     |
| Results of additional analyses           | 23        | Give results of additional analyses, if done (e.g., sensitivity or subgroup analyses, meta-regression analyses, <i>alternative network geometries studied, alternative choice of prior distributions for Bayesian analyses, and so forth</i> ).                                                                                                                                                                                                              | <b>n.a</b>              |
| <b>DISCUSSION</b>                        |           |                                                                                                                                                                                                                                                                                                                                                                                                                                                              |                         |
| Summary of evidence                      | 24        | Summarize the main findings, including the strength of evidence for each main outcome; consider their relevance to key groups (e.g., healthcare providers, users, and policy-makers).                                                                                                                                                                                                                                                                        | 17                      |
| Limitations                              | 25        | Discuss limitations at study and outcome level (e.g., risk of bias), and at review level (e.g., incomplete retrieval of identified research, reporting bias). <i>Comment on the validity of the assumptions, such as transitivity and consistency.</i> Comment                                                                                                                                                                                               | 16-17                   |

|    |                |                                                                    |                                                                    |
|----|----------------|--------------------------------------------------------------------|--------------------------------------------------------------------|
| 1  |                | <i>on any concerns regarding network geometry (e.g., avoidance</i> |                                                                    |
| 2  |                | <i>of certain comparisons).</i>                                    |                                                                    |
| 3  |                |                                                                    |                                                                    |
| 4  | Conclusions    | 26                                                                 | Provide a general interpretation of the results in the context of  |
| 5  |                |                                                                    | other evidence, and implications for future research.              |
| 6  |                |                                                                    |                                                                    |
| 7  | <b>FUNDING</b> |                                                                    |                                                                    |
| 8  | Funding        | 27                                                                 | Describe sources of funding for the systematic review and other    |
| 9  |                |                                                                    | support (e.g., supply of data); role of funders for the systematic |
| 10 |                |                                                                    | review. This should also include information regarding whether     |
| 11 |                |                                                                    | funding has been received from manufacturers of treatments in      |
| 12 |                |                                                                    | the network and/or whether some of the authors are content         |
| 13 |                |                                                                    | experts with professional conflicts of interest that could affect  |
| 14 |                |                                                                    | use of treatments in the network.                                  |
| 15 |                |                                                                    |                                                                    |
| 16 |                |                                                                    |                                                                    |

PICOS = population, intervention, comparators, outcomes, study design.

\* Text in italics indicates wording specific to reporting of network meta-analyses that has been added to guidance from the PRISMA statement.

† Authors may wish to plan for use of appendices to present all relevant information in full detail for items in this section.

### **Box. Terminology: Reviews With Networks of Multiple Treatments**

Different terms have been used to identify systematic reviews that incorporate a network of multiple treatment comparisons. A brief overview of common terms follows.

*Indirect treatment comparison:* Comparison of 2 interventions for which studies against a common comparator, such as placebo or a standard treatment, are available (i.e., indirect information). The direct treatment effects of each intervention against the common comparator (i.e., treatment effects from a comparison of interventions made within a study) may be used to estimate an indirect treatment comparison between the 2 interventions (**Appendix Figure 1, A**). An indirect treatment comparison (ITC) may also involve multiple links. For example, in **Appendix Figure 1, B**, treatments B and D may be compared indirectly on the basis of studies encompassing comparisons of B versus C, A versus C, and A versus D.

*Network meta-analysis or mixed treatment comparison:* These terms, which are often used interchangeably, refer to situations involving the simultaneous comparison of 3 or more interventions. Any network of treatments consisting of strictly unclosed loops can be thought of as a series of ITCs (**Appendix Figure 1, A and B**). In mixed treatment comparisons, both direct and indirect information is available to inform the effect size estimates for at least some of the comparisons; visually, this is shown by closed loops in a network graph (**Appendix Figure 1, C**). Closed loops are not required to be present for every comparison under study. "Network meta-analysis" is an inclusive term that incorporates the scenarios of both indirect and mixed treatment comparisons.

*Network geometry evaluation:* The description of characteristics of the network of interventions, which may include use of numerical summary statistics. This does not involve quantitative synthesis to compare treatments. This evaluation describes the current evidence available for the competing interventions to identify gaps and potential bias. Network geometry is described further in **Appendix Box 4**.

### **Appendix Box 1. The Assumption of Transitivity for Network Meta-Analysis**

Methods for indirect treatment comparisons and network meta-analysis enable learning about the relative treatment effects of, for example, treatments A and B through use of studies where these interventions are compared against a common therapy, C.

When planning a network meta-analysis, it is important to assess patient and study characteristics across the studies that compare pairs of treatments. These characteristics are commonly referred to as *effect modifiers* and include traits such as average patient age, gender distribution, disease severity, and a wide range of other plausible features.

For network meta-analysis to produce valid results, it is important that the distribution of effect modifiers is similar, for example, across studies of A versus B and A versus C. This balance increases the plausibility of reliable findings from an indirect comparison of B versus C through the common comparator A. When this balance is present, the assumption of transitivity can be judged to hold.

Authors of network meta-analyses should present systematic (and even tabulated) information regarding patient and study characteristics whenever available. This information helps readers to empirically evaluate the validity of the assumption of transitivity by reviewing the distribution of potential effect modifiers across trials.

review only

## **Appendix Box 2. Differences in Approach to Fitting Network Meta-Analyses**

Network meta-analysis can be performed within either a frequentist or a Bayesian framework. Frequentist and Bayesian approaches to statistics differ in their definitions of probability. Thus far, the majority of published network meta-analyses have used a Bayesian approach.

Bayesian analyses return the posterior probability distribution of all the model parameters given the data and prior beliefs (e.g., from external information) about the values of the parameters. They fully encapsulate the uncertainty in the parameter of interest and thus can make direct probability statements about these parameters (e.g., the probability that one intervention is superior to another).

Frequentist analyses calculate the probability that the observed data would have occurred under their sampling distribution for hypothesized values of the parameters. This approach to parameter estimation is more indirect than the Bayesian approach.

Bayesian methods have been criticized for their perceived complexity and the potential for subjectivity to be introduced by choice of a prior distribution that may affect study findings. Others argue that explicit use of a prior distribution makes transparent how individuals can interpret the same data differently. Despite these challenges, Bayesian methods offer considerable flexibility for statistical modeling. In-depth introductions to Bayesian methods and discussion of these and other issues can be found elsewhere.

Review only

### **Appendix Box 3. Network Meta-Analysis and Assessment of Consistency**

Network meta-analysis often involves the combination of direct and indirect evidence. In the simplest case, we wish to compare treatments A and B and have 2 sources of information: direct evidence via studies comparing A versus B, and indirect evidence via groups of studies comparing A and B with a common intervention, C. Together, this evidence forms a closed loop, ABC.

Direct and indirect evidence for a comparison of interventions should be combined only when their findings are similar in magnitude and interpretation. For example, for a comparison of mortality rates between A and B, an odds ratio determined from studies of A versus B should be similar to the odds ratio comparing A versus B estimated indirectly based on studies of A versus C and B versus C. This assumption of comparability of direct and indirect evidence is referred to as *consistency* of treatment effects.

When a treatment network contains a closed loop of interventions, it is possible to examine statistically whether there is agreement between the direct and indirect estimates of intervention effect.

Different methods to evaluate potential differences in relative treatment effects estimated by direct and indirect comparisons are grouped as *local approaches* and *global approaches*. Local approaches (e.g., the Bucher method or the node-splitting method) assess the presence of inconsistency for a particular pairwise comparison in the network, whereas global approaches (e.g., inconsistency models,  $I^2$  measure for inconsistency) consider the potential for inconsistency in the network as a whole.

Tests for inconsistency can have limited power to detect a true difference between direct and indirect evidence. When multiple loops are being tested for inconsistency, one or a few may show inconsistency simply by chance. Further discussions of consistency and related concepts are available elsewhere.

Inconsistency in a treatment network can indicate lack of transitivity (see **Appendix Box 1**).

#### **Appendix Box 4. Network Geometry and Considerations for Bias**

The term *network geometry* is used to refer to the architecture of the treatment comparisons that have been made for the condition under study. This includes what treatments are involved in the comparisons in a network, in what abundance they are present, the respective numbers of patients randomly assigned to each treatment, and whether particular treatments and comparisons may have been preferred or avoided.

Networks may take on different shapes. Poorly connected networks depend extensively on indirect comparisons. Meta-analyses of such networks may be less reliable than those from networks where most treatments have been compared against each other.

Qualitative description of network geometry should be provided and accompanied by a network graph. Quantitative metrics assessing features of network geometry, such as *diversity* (related to the number of treatments assessed and the balance of evidence among them), *co-occurrence* (related to whether comparisons between certain treatments are more or less common), and *homophily* (related to the extent of comparisons between treatments in the same class versus competing classes), can also be mentioned.

Although common, established steps for reviewing network geometry do not yet exist, however examples of in-depth evaluations have been described related to treatments for tropical diseases and basal cell carcinoma and may be of interest to readers. An example based on 75 trials of treatments for pulmonary arterial hypertension (**Appendix Figure 3**) suggests that head-to-head studies of active therapies may prove useful to further strengthen confidence in interpretation of summary estimates of treatment comparisons.

### **Appendix Box 5. Probabilities and Rankings in Network Meta-Analysis**

Systematic reviews incorporating network meta-analyses can provide information about the hierarchy of competing interventions in terms of treatment rankings.

The term *treatment ranking probabilities* refers to the probabilities estimated for each treatment in a network of achieving a particular placement in an ordering of treatment effects from best to worst. A network of 10 treatments provides a total of 100 ranking probabilities—that is, for each intervention, the chance of being ranked first, second, third, fourth, fifth, and so forth).

Several techniques are feasible to summarize relative rankings, and include graphical tools as well as different approaches for estimating ranking probabilities. **Appendix Figure 6** shows 2 approaches to presenting such information, on the basis of a comparison of adjuvant interventions for resected pancreatic adenocarcinoma.

Robust reporting of rankings also includes specifying median ranks with uncertainty intervals, cumulative probability curves, and the surface under the cumulative ranking (SUCRA) curve.

Rankings can be reported along with corresponding estimates of pairwise comparisons between interventions. Rankings should be reported with probability estimates to minimize misinterpretation from focusing too much on the most likely rank.

Rankings may exaggerate small differences in relative effects, especially if they are based on limited information. An objective assessment of the strength of information in the network and the magnitude of absolute benefits should accompany rankings to minimize potential biases.



1  
2  
3  
4  
5  
6  
7  
8  
9  
10  
11  
12  
13  
14  
15  
16  
17  
18  
19  
20  
21  
22  
23  
24  
25  
26  
27  
28  
29  
30  
31  
32  
33  
34  
35  
36  
37  
38  
39  
40  
41  
42  
43  
44  
45  
46  
47  
48  
49  
50  
51  
52  
53  
54  
55  
56  
57  
58  
59  
60

**Appendix Figure 1A-1C**

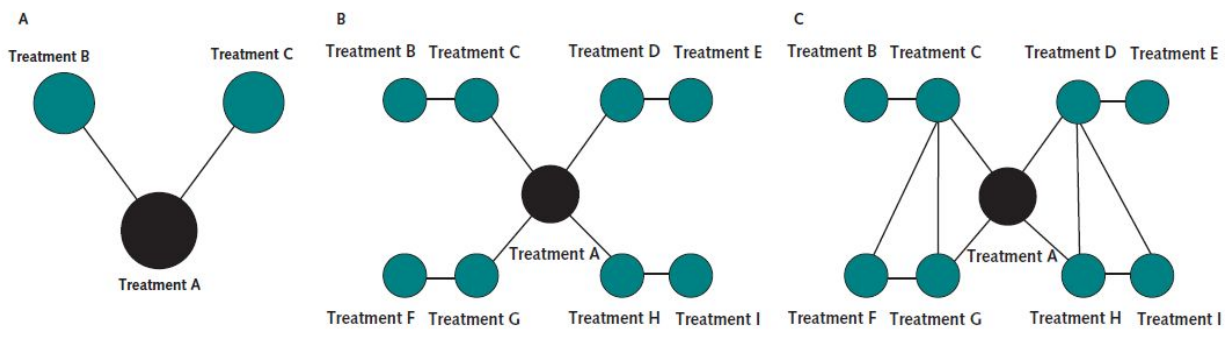

**Appendix Figure 3**

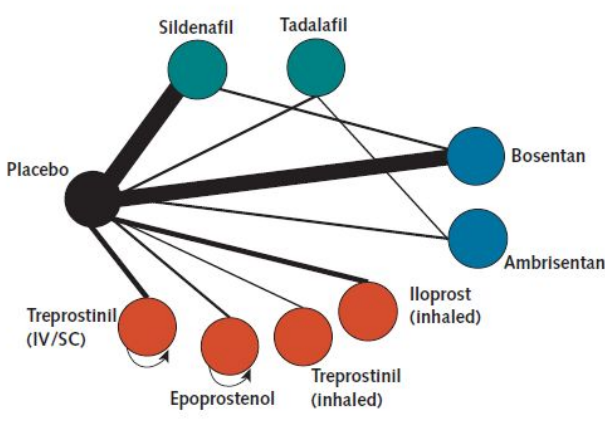

**Appendix Figure 6**

| Ranking | Treatment and Coresponding Ranking Probabilities<br>Grade 3 or 4 Hematologic Toxicity |             |                          |                                 |
|---------|---------------------------------------------------------------------------------------|-------------|--------------------------|---------------------------------|
|         | 5-FU                                                                                  | Gemcitabine | Chemoradiation<br>+ 5-FU | Chemoradiation<br>+ gemcitabine |
| 1       | 0.42                                                                                  | 0.42        | 0.15                     | 0.01                            |
| 2       | 0.46                                                                                  | 0.36        | 0.15                     | 0.02                            |
| 3       | 0.10                                                                                  | 0.17        | 0.68                     | 0.04                            |
| 4       | 0.02                                                                                  | 0.05        | 0.02                     | 0.93                            |

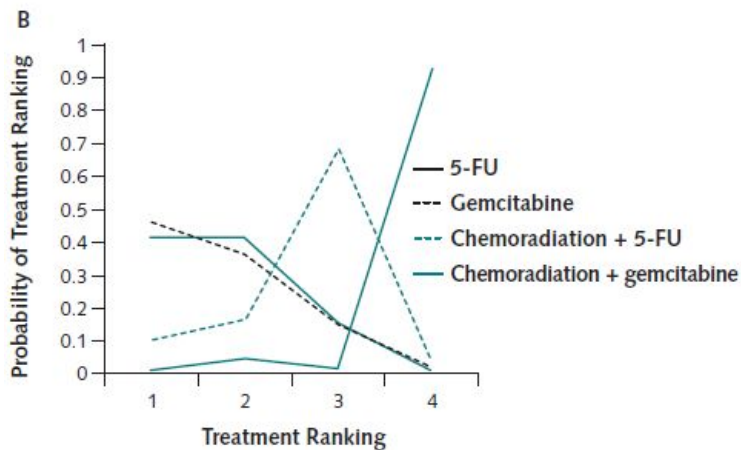

# BMJ Open

## Being the next of kin of a person with a brain tumor: a qualitative metasynthesis focusing on coping factors and strategies

|                                    |                                                                                                                                                                                                                             |
|------------------------------------|-----------------------------------------------------------------------------------------------------------------------------------------------------------------------------------------------------------------------------|
| Journal:                           | <i>BMJ Open</i>                                                                                                                                                                                                             |
| Manuscript ID                      | bmjopen-2021-052872.R1                                                                                                                                                                                                      |
| Article Type:                      | Original research                                                                                                                                                                                                           |
| Date Submitted by the Author:      | 07-Feb-2022                                                                                                                                                                                                                 |
| Complete List of Authors:          | Lien, Anette; University of Agder, Faculty of Health and Sport Sciences<br>Rohde, Gudrun; University of Agder, Faculty of Health and Sport<br>Sciences; Sorlandet Hospital Kristiansand, Department of Clinical<br>Research |
| <b>Primary Subject<br>Heading</b>: | Palliative care                                                                                                                                                                                                             |
| Secondary Subject Heading:         | Health policy                                                                                                                                                                                                               |
| Keywords:                          | MEDICAL ETHICS, ONCOLOGY, Head & neck tumours < ONCOLOGY                                                                                                                                                                    |
|                                    |                                                                                                                                                                                                                             |

SCHOLARONE™  
Manuscripts

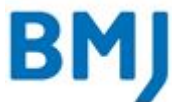

I, the Submitting Author has the right to grant and does grant on behalf of all authors of the Work (as defined in the below author licence), an exclusive licence and/or a non-exclusive licence for contributions from authors who are: i) UK Crown employees; ii) where BMJ has agreed a CC-BY licence shall apply, and/or iii) in accordance with the terms applicable for US Federal Government officers or employees acting as part of their official duties; on a worldwide, perpetual, irrevocable, royalty-free basis to BMJ Publishing Group Ltd ("BMJ") its licensees and where the relevant Journal is co-owned by BMJ to the co-owners of the Journal, to publish the Work in this journal and any other BMJ products and to exploit all rights, as set out in our [licence](#).

The Submitting Author accepts and understands that any supply made under these terms is made by BMJ to the Submitting Author unless you are acting as an employee on behalf of your employer or a postgraduate student of an affiliated institution which is paying any applicable article publishing charge ("APC") for Open Access articles. Where the Submitting Author wishes to make the Work available on an Open Access basis (and intends to pay the relevant APC), the terms of reuse of such Open Access shall be governed by a Creative Commons licence – details of these licences and which [Creative Commons](#) licence will apply to this Work are set out in our licence referred to above.

Other than as permitted in any relevant BMJ Author's Self Archiving Policies, I confirm this Work has not been accepted for publication elsewhere, is not being considered for publication elsewhere and does not duplicate material already published. I confirm all authors consent to publication of this Work and authorise the granting of this licence.

1 **Being the next of kin of a person with a brain tumor: a qualitative**  
2 **metasynthesis focusing on coping factors and strategies**

3 *Lien, Anette Windsland<sup>1</sup>*

4 [anette\\_lien@hotmail.com](mailto:anette_lien@hotmail.com)

5 Gudrun Rohde<sup>1, 2</sup>

6 [gudrun.e.rohde@uia.no](mailto:gudrun.e.rohde@uia.no)

7  
8 <sup>1</sup>Faculty of Health and Sport Sciences, University of Agder, Kristiansand, Norway

9 <sup>2</sup>Department of Clinical Research, Sorlandet Hospital, Kristiansand, Norway

10

11 **Corresponding author:**

12 Gudrun Rohde, Faculty of Health and Sport Sciences, University of Agder, Postbox 422,

13 4604 Kristiansand, Norway

14

15 **Word Count:** 3981

16

17 **ABSTRACT**

18 **Purpose:** Being the next of kin of a person with a brain tumor is a stressful experience. For  
19 many, being a next of kin involves fear, insecurity, and overwhelming responsibility. The  
20 purpose of this study was to identify and synthesize qualitative original studies to explore  
21 coping factors and strategies that next of kin use in their role.

22 **Method:** A qualitative metasynthesis guided by Sandelowski and Barroso's guidelines was  
23 used. The databases Medline, CHINAL, and PsycINFO were searched for studies from  
24 January 2000 to January 18 2022. . Inclusion criteria were qualitative original studies

1  
2  
3 25 focusing on coping factors or strategies used by the next of kin of persons with brain  
4  
5 26 tumors. The study participants had to be aged 18 years of age or older  
6  
7  
8 27 **Results:** Of 1 476 screened records, data from 20 studies, including 342 participants (207  
9  
10 28 female, 81 male, and 54 unclassified) were analyzed into metasummaries and a  
11  
12 29 metasynthesis. The next of kin used coping factors such as their personal characteristics,  
13  
14 30 finding meaning in their situation, external support, hope and religion, and findingg  
15  
16 31 interlocutors. Coping strategies to manage the situation involved regaining control, being  
17  
18 32 proactive and acceptance.  
19  
20  
21  
22 33 **Conclusion:** Next of kin of patients with brain tumor used coping factors and coping  
23  
24 34 strategies gathered within themselves, in their surroundings and with assistance from a  
25  
26 35 higher power to handle the situation and their role. It is important that health-care  
27  
28 36 professionals suggest and facilitate these coping factors and strategies because this could  
29  
30 37 reduce stress and make the role of next of kin more manageable.  
31  
32  
33  
34 38 **Keywords:** brain tumor; coping factors; coping strategies; metasynthesis; next of kin;  
35  
36 39 review; qualitative studies  
37  
38  
39  
40

#### 41 **Strengths and limitations of the study**

- 42 • The qualitative approach makes an important contribution to the research field by  
43 providing a deeper understanding of coping factors and strategies used by the next  
44 of kin of a person with a brain tumor.
- 45 • Most of the included studies in this metasynthesis were high-quality studies.

- 46 • Our sample is highly multicultural with different geographical origins represented  
47 and includes different welfare and health-care systems, and different cultures and  
48 religions.
- 49 • A limitation is that some of the subthemes, or parts of their content, could have  
50 been categorized in the other main theme.
- 51 • The majority of the sample comprised women. A more heterogeneous sample  
52 might have revealed more nuanced findings of the role of next of kin.

## 54 INTRODUCTION

55 In 2020 308,102 people worldwide with cancer in the central nervous system were  
56 registered.<sup>1</sup> The diagnosis brain tumor is very confronting, with 56% of patients  
57 experiencing one or more symptoms. Hemiparesis and cognitive challenges are most  
58 frequently reported but also headache, nausea and vomiting, vision challenges, epileptic  
59 seizures, and personality changes are considered common symptoms.<sup>2-5</sup> Changes in  
60 behavior and personality are considered particularly challenging, both for the patient and  
61 for the next of kin, as this may include apathy, loss of initiative and empathy, indifference,  
62 selfishness, physical and mental aggression, impaired emotional control and social  
63 abilities, and tendencies toward childish behavior, among others.<sup>3 5 6</sup> Studies show that the  
64 disease can be more challenging and stressful for the next of kin than for the patients. The  
65 next of kin have high rates of depression, anxiety, diverse physical pain, difficulty  
66 adapting, loneliness, and high absence from work, as well as a reduced quality of life.<sup>7-11</sup>  
67 Studies also show that both patients and next of kin miss additional follow-up, support,

1  
2  
3 68 and information from health-care providers, family, friends, and the community in their  
4  
5 69 struggle to cope with everyday life.<sup>12 13</sup>  
6  
7

8 70 All these strains can lead to next of kin experiencing stress and lack of coping. Lazarus and  
9  
10 71 Folkman define coping as a cognitive and behavioral endeavor under constant change,  
11  
12 72 dealing with external and/or internal demands that a cognitive assessment indicates are  
13  
14 73 stressful or that exceed personal resources. When dealing with these demands, the next of  
15  
16 74 kin has to review available coping factors; personal, external and characteristics of the  
17  
18 75 situation itself.<sup>14</sup> This review will determine whether the situation is perceived as  
19  
20 76 manageable or stressful, and secondly influence which coping strategy next of kin use.<sup>9 13</sup>  
21  
22  
23

24 77 <sup>14</sup>

25  
26  
27 78 Despite this, there are only a few original qualitative studies that have investigated the  
28  
29 79 coping factors that make everyday life more manageable or which strategies next of kin  
30  
31 80 use to cope with their new role and tasks. To our knowledge, this research has not been  
32  
33 81 synthesized. Such information is of great importance, especially for health-care providers  
34  
35 82 working with this group of caregivers. With improved understanding, they could expect to  
36  
37 83 be better able to facilitate more manageable everyday life among the next of kin. There is  
38  
39 84 some quantitative research directed at these aspects,<sup>8-11 15</sup> but we wanted studies that were  
40  
41 85 personal and focused on the lived experience of next of kin, hence the choice of qualitative  
42  
43 86 studies. Therefore, the purpose of this metasynthesis was to identify and synthesize  
44  
45 87 evidence from original qualitative studies regarding the experience of next of kin with  
46  
47 88 coping factors and strategies in their role as next of kin for a person with a brain tumor.  
48  
49 89 The findings are discussed in the context of Lazarus and Folkman's stress theory<sup>14</sup> and the  
50  
51 90 approach to coping with stress to interpret our findings in a theoretical context.  
52  
53  
54  
55  
56  
57  
58  
59  
60



## 91 **METHODS**

### 92 *Design*

93 The study was a metasynthesis within the interpretative paradigm. It was inspired by a  
94 phenomenological–hermeneutic design because the aim was to identify and synthesize  
95 qualitative original studies that explored next of kin attitudes and experiences.<sup>16</sup> The  
96 metasynthesis process consisted of five steps: (1) formulating the purpose and rationale of  
97 the study; (2) searching for and retrieving relevant qualitative research studies; (3)  
98 critically appraising the included studies; (4) classifying the findings, and finally; (5)  
99 synthesizing the findings.

### 100 *Search strategy*

101 In collaboration with an experienced librarian, we conducted a systematic search within the  
102 PsycINFO, OVID, CHINAL, and Medline databases via EBSCO host up from January  
103 2000 until 18 January 2022. For search strategy see supplementary materials 1.

104 The inclusion criteria were qualitative original studies published in English, Norwegian,  
105 Swedish or Danish language that aimed to explore the factors or strategies used by the next  
106 of kin of persons with brain tumors, regardless of tumor type and stage, that enhanced their  
107 role as next of kin. The next of kin had to be 18 years of age or older. The exclusion  
108 criteria were studies that did not clearly identify coping factors or strategies, factors or  
109 strategies that included the participants' experiences in the role of bereaved and not next of  
110 kin, and studies including diagnoses other than a brain tumor.

1  
2  
3 111 ***Search outcome***  
4

5  
6 112 The search strategy generated 1 476 unique citations. Titles and abstracts were screened by  
7  
8 113 the authors using Rayyan, a systematic review management software.<sup>17</sup> A final consensus  
9  
10 114 regarding the eligible articles was obtained through a group discussion between the  
11  
12 115 authors. Seventy-two papers were read in full and evaluated against the inclusion criteria  
13  
14 116 by both authors; 20 of these were included in the metasynthesis. Figure 1 shows the  
15  
16 117 Preferred Reporting Items for Systematic Reviews and Meta-Analyses (PRISMA)  
17  
18 118 flowchart with a full overview of the screening process. The search output is presented in  
19  
20 119 the PRISMA flowchart. The authors read the full text of the eligible articles and  
21  
22 120 independently extracted data from the included studies; this process is illustrated in Figure  
23  
24 121 1. Consensus for data extraction was obtained as part of a group discussion between the  
25  
26 122 authors. Table 1 lists the title, author(s), study country, year of publication, aim, analysis,  
27  
28 123 and study participants of all included studies. Most studies were from Europe: Sweden (3),  
29  
30 124 Great Britain (3), Denmark (1), Belgium (1), and Turkey (1); seven were from Canada (3)  
31  
32 125 and the USA (4), two from Australia and two from Taiwan. The tumor type and stage  
33  
34 126 varied. For details, see supplementary materials 2.  
35  
36  
37  
38  
39

40  
41 127 Figure 1 about here  
42

43  
44 128 ***Quality appraisal***  
45

46 129 The quality of the 20 papers was evaluated using the Critical Appraisal Skills Program  
47  
48 130 (CASP) for qualitative studies. The first evaluation was conducted blinded and  
49  
50 131 independently by AWL and GR, whose CASP evaluations were then compared. Using the  
51  
52 132 criteria in CASP for independent assessment, the authors mutually agreed on a final quality  
53  
54 133 evaluation. For details, see Table 1.  
55  
56  
57  
58  
59  
60

1  
2  
3 134 The included studies appraised according to CASP are listed in Table 2. All studies had  
4  
5 135 clearly stated the study aim and the qualitative methodologies were considered appropriate.  
6  
7 136 Furthermore, several of the studies had been published in highly ranked journals. The most  
8  
9 137 poorly addressed issue (criteria number 6 in the CASP list) was the influence of the  
10  
11 138 researcher on the research and vice versa.  
12  
13

14  
15 139 Table 1 about here  
16

### 17 18 140 ***Data abstraction and analyses*** 19

20  
21 141 As suggested by Sandelowski and Barroso,<sup>16</sup> two approaches to qualitative synthesis were  
22  
23 142 used. The first of these involved qualitative metasummaries of qualitative findings from  
24  
25 143 the original studies. This method is defined as qualitative, but the findings are presented  
26  
27 144 quantitatively. The second involved a metasynthesis that developed new interpretations of  
28  
29 145 the target findings from the original studies.<sup>16</sup> The narrative analysis was inspired by  
30  
31 146 Lindseth and Nordberg's phenomenological–hermeneutic methods.<sup>18</sup> Three steps were  
32  
33 147 followed. First, the empirical materials were read several times. Second, after extraction,  
34  
35 148 the target findings were imported into NVivo 11 data management software for further  
36  
37 149 analysis.<sup>19</sup> The text was read line-by-line to identify meaning units, subthemes, and  
38  
39 150 themes. Third, the researchers aimed to achieve a comprehensive understanding of the  
40  
41 151 empirical materials, meaning units, and themes, and to relate these to the aim and research  
42  
43 152 question of the metasynthesis.<sup>18</sup> The analytic themes were identified by AWL and  
44  
45 153 discussed with GR. The process of deriving the themes was inductive. The contribution of  
46  
47 154 targeted findings from each of the included papers is outlined, and quotations are used to  
48  
49 155 illustrate and support the findings, which increases the trustworthiness of the study. To  
50  
51 156 validate the findings, both authors participated in discussions of the empirical analysis and  
52  
53 157 in writing up the findings. Ethical approval was not required for the study.  
54  
55  
56  
57  
58  
59  
60

1  
2  
3 158 Table 2 about here  
4  
5

6 159 ***Synthesis***  
7  
8

9 160 Qualitative metasynthesis provides novel interpretations of the target findings from  
10  
11 161 original studies.<sup>16</sup> The two main themes of this metasynthesis were coping factors within  
12  
13 162 the next of kin and as external support and coping strategies – control and proactivity. The  
14  
15 163 first main theme, coping factors, consisted of the subthemes, personal characteristics,  
16  
17 164 meaningful, external support, having interlocutors, and hope and religion. The second main  
18  
19 165 theme, coping strategies, consisted of the subthemes regain control, fight against, and  
20  
21 166 acceptance. For a list of the studies that generated findings for the main themes and  
22  
23 167 subthemes, see Table 2.  
24  
25  
26  
27  
28

29 168 **PATIENT AND PUBLIC INVOLVEMENT**  
30  
31

32  
33 169 This systematic review is based on published original studies and does not involve public  
34  
35 170 involvement.  
36  
37

38  
39 171 **RESULTS**  
40  
41

42 172 The findings are presented as metasummaries supported by tables and figures, and as a  
43  
44 173 metasynthesis containing seven subthemes presented under two main themes. Each  
45  
46 174 subtheme is supported by illustrative quotes from the original studies included.  
47  
48  
49

50 175 ***Metasummaries***  
51  
52

53 176 The 20 included studies consisted of 342 participants (207 women, 81 men, and 54 not  
54  
55 177 classified). The focus was on the following themes: the needs of the next of kin;<sup>2 20-24</sup> their  
56  
57 178 overall experiences as next of kin;<sup>10 25-27</sup> coping and coping mechanisms;<sup>28-30</sup> postoperative  
58  
59  
60

1  
2  
3 179 caregiving,<sup>31 32</sup> being a next of kin in the palliative phase,<sup>33 34</sup> support factors  
4  
5 180 experienced,<sup>35</sup> how the caregiving changed over time;<sup>36</sup> and factors influencing treatment  
6  
7 181 choice in the palliative phase.<sup>37</sup> Three of the studies were undertaken six months after  
8  
9 182 diagnosis,<sup>27 30 31 36</sup> and three in the patients' palliative phase or postmortem.<sup>33 34 37</sup> In six  
10  
11 183 studies, all the patients were children of the informants.<sup>10 29 30 33 34</sup>  
12  
13  
14

## 15 184 *Metasynthesis*

16  
17  
18 185 *Main theme 1: Coping factors within the next of kin and as external support*

19  
20 186 *Personal characteristics* such as a strong and positive personality were important coping  
21  
22 187 factors for next of kin in new challenging situations.<sup>25 29 37</sup> Being able to show empathy for  
23  
24 188 the patient and the health professionals were important, as if not the situation otherwise  
25  
26 189 easily could engender feelings such as discouragement and reproach.<sup>25</sup> A positive mood  
27  
28 190 and humor were also emphasized as for the same reasons.<sup>29</sup>  
29  
30  
31

32 191 The role as next of kin was considered to be *meaningful* and important, as it made them  
33  
34 192 feel needed and productive in the situation.<sup>23 25 28 31</sup> Engagement and commitment in the  
35  
36 193 care of their relatives were highlighted by many next of kin, especially when the patients  
37  
38 194 appreciated the help.<sup>23</sup> The engagement was even stronger when the emotional bond  
39  
40 195 between patient and next of kin was strong.<sup>20 21 29 35</sup>  
41  
42  
43

44  
45 196 *“But caring for him is something I will do—it is not a burden.”<sup>31</sup> (p. 81)*

46  
47  
48 197 However, other studies revealed less engagement and commitment, and underlined anger  
49  
50 198 and reluctance with the new role as the heavy responsibility and sacrifice impacted the  
51  
52 199 next of kin's own needs and wishes.<sup>21 22 25 31 33</sup>  
53  
54  
55  
56  
57  
58  
59  
60

1  
2  
3 200 *External support* made the role of next of kin easier to cope with. The support was given  
4  
5 201 by family, friends, neighbors, colleagues and workplaces, health personnel, schools, the  
6  
7 202 religious community, people in the local community, and even strangers.<sup>2 10 20-35</sup> The  
8  
9 203 support from health-care professionals was especially important. This support included  
10  
11 204 emotional support and assistance during patient care and treatment .<sup>2 10 20-27 29-35</sup> The  
12  
13 205 importance of assistance such as medical supervision and nursing care was emphasized,<sup>10</sup>  
14  
15 206 <sup>22 29</sup> with next of kin noting that this made it possible to feel like a partner again,<sup>23</sup> while  
16  
17 207 concurrently allowing anticipated time alone.<sup>24</sup> A well-known health-care professional was  
18  
19 208 crucial in making this possible, because it implied that the patient received the best care as  
20  
21 209 they were known to the health-care professional, and also because the assistance was  
22  
23 210 considered to be less intrusive.<sup>23 24</sup> To experience the assistance with care as a coping  
24  
25 211 factor, it was crucial that care be compassionate and of the best quality. These qualities  
26  
27 212 emphasized the health professional's genuine care and gave the patients and the next of kin  
28  
29 213 hope and desire to fight the disease.<sup>10 21 23 26 27 29</sup>

30  
31  
32  
33  
34  
35  
36 214 *“She (neurosurgeon) had to give us some bad news some of the time...*  
37  
38 215 *and you couldn't ask for a better manner in her delivery of that bad*  
39  
40 216 *news, or her support in what we were going through.”<sup>35</sup> (p. 8)*

41  
42  
43  
44 217 When next of kin experienced that their loved ones received a low quality of care or  
45  
46 218 suffered malpractice, it implied mistrust of the health-care system and weakened the  
47  
48 219 experience of health-care professionals as a support factor.<sup>10 20 23 24</sup> Emotional support from  
49  
50 220 health-care professionals implied an acknowledgment that the disease affected not only the  
51  
52 221 patients, but also their next of kin. It also implied that the health-care professionals  
53  
54 222 recognized and met the wishes of the next of kin for active participation in monitoring the  
55  
56  
57  
58  
59  
60

1  
2  
3 223 patient's disease course.<sup>23 25 26 34</sup> Next of kin who did not have such involvement felt  
4  
5 224 ignored, useless, and helpless.<sup>25 29</sup>  
6  
7

8 225 Support from family and friends was invaluable in the care tasks and in coping with the  
9  
10 226 role of the next of kin.  
11

12  
13  
14 227 *“Just support from family and friends, that was important to me, and just*  
15  
16 228 *knowing that I could call on them... ”*<sup>22</sup> (p. 1098)  
17

18  
19 229 Social, practical, and emotional support was emphasized, and included such things as  
20  
21 230 economic help, childcare, transport, and housekeeping.<sup>10 22 24 25 29-32 34 35</sup> Some next of kin  
22  
23 231 would have appreciated even more support and help from family and friends, preferably  
24  
25 232 given on their own initiative.<sup>20 22 24 25 35 36</sup>  
26  
27

28  
29 233 Having *interlocutors*, meaning having someone to confide in and talk to, were also  
30  
31 234 important in coping with the role as next of kin, as the situation, the responsibility and the  
32  
33 235 impressions were though. Supportive conversations with health-care professionals were  
34  
35 236 highly appreciated by many next of kin. However, this required the health-care  
36  
37 237 professional's understanding and empathy for the situation of the patient as well as of their  
38  
39 238 next of kin, and preferably that they should be available at all times.<sup>21 23 26 30 31 37</sup>  
40  
41

42  
43 239 Discussions with family and friends were also important,<sup>21 24 25 27</sup> and could even produce a  
44  
45 240 stronger bond.<sup>25</sup> Such a bond required families and friends to understand and recognize the  
46  
47 241 challenges faced by the next of kin.<sup>24</sup> Support groups and conversations with other next of  
48  
49 242 kin were also highlighted,<sup>2 22 24 30 34 35 37</sup> as it could broaden the next of kins understanding  
50  
51 243 of the tumor and what might to expect in the future.<sup>27</sup> These conversations could be face-  
52  
53 244 to-face or via the Internet.<sup>2 22 24 30 34 35 37</sup>  
54  
55  
56  
57  
58  
59  
60

1  
2  
3 245 *“From time to time, I need to be able to talk to someone. Because when I*  
4  
5 246 *lay down in the evening, then it starts to work in the inside.”*<sup>23</sup> (p. 411)  
6  
7

8  
9 247 On the other hand, support groups were also considered demanding because it was difficult  
10  
11 248 to listen to other families’ stories. Furthermore, for some it was considered a waste of time  
12  
13 249 to spend valuable hours with people other than their closest family members.<sup>10 22 31</sup>  
14  
15

16 250 *Hope and religion* were emphasized as important coping factors. The next of kin hoped  
17  
18 251 that a miraculous treatment would be developed so that their loved ones could survive the  
19  
20 252 disease or just have a better quality of life.<sup>2 10 20-23 26 33 34</sup>  
21  
22

23  
24 253 *You see a positive evolution, and everything that goes better is good for*  
25  
26 254 *her. (...) Nobody can forbid us to have hope. And miracles happen.*  
27  
28 255 *Whether we believe it or not, that’s not the point, it is the only thing to*  
29  
30 256 *focus on.”*<sup>23</sup> (p. 409)  
31  
32

33  
34 257 Hope gave a reason to fight, although it weakened in the palliative phase.<sup>21 26 34</sup> Faith  
35  
36 258 strengthened the hope of healing during the treatment period and gave some form of peace  
37  
38 259 in the final palliative phase. In most cases, hope was related to faith.<sup>25-27 30 34 37</sup>  
39  
40

41  
42 260 *Main theme 2: Coping strategies – control and proactivity*  
43  
44

45  
46 261 *Regaining control* of the situation was a frequent coping strategy, and for most this  
47  
48 262 included gathering enough information to allow an overview of what to expect, which  
49  
50 263 implied some form of security.<sup>10 20-23 27 30 35 37</sup>  
51  
52

53  
54 264 *“So it’s a, it’s a roller coaster of emotion but for the most part I’ve been,*  
55  
56 265 *‘What do we need to do? Where do we need to be?’ And then just read,*  
57  
58



1  
2  
3 266 *read, read whatever I can find out, whatever information because I feel*  
4  
5 267 *like whatever I know, I can ask for.*<sup>30</sup> (p. 34)  
6  
7

8  
9 268 The information gathered and provided should preferably be adapted to the situation and  
10  
11 269 the disease trajectory, and been given by health-care professionals.<sup>20 22 23 25 27 29 37</sup> The next  
12  
13 270 of kin often hid this information from the patients to protect them and not diminish their  
14  
15 271 hope.<sup>10 26 30 31 34</sup>  
16

17  
18 272 To regain control meant not only control of the diagnosis, but also personal control and  
19  
20 273 control over their own reactions. In some cases, the next of kin denied their feelings. Some  
21  
22 274 even denied the entire diagnosis,<sup>20 25 29 30</sup> and instead focused on being strong for the  
23  
24 275 patient and the entire family.<sup>23 25 30 32-34 36</sup> One next of kin in Edvardsson and Ahlstroms'  
25  
26 276 (2008) study<sup>25</sup> reported:  
27

28  
29  
30 277 *"I've sort of stowed it all away, I suppose. It is as if I'd experienced it from the*  
31  
32 278 *outside or seen it on TV. It's often that way with sorrowful things."* (p. 588)  
33  
34

35 279 *Being proactive, facilitate and encouraging the patient to fight the disease were also*  
36  
37 280 *important coping strategies, as it felt better than accepting the morbid situation and not do*  
38  
39 281 *anything.*<sup>10 21 25 26 34</sup>  
40  
41

42  
43 282 *"People ask you how you cope. But what if you were to give up? You've*  
44  
45 283 *got to cope—and we do have each other! (...)." <sup>25</sup> (p. 588)*  
46  
47

48  
49 284 This implied adopting a healthier lifestyle, including changing diet and exercise habits,  
50  
51 285 hoping that this would improve the effects of medical treatment,<sup>21 26</sup> or trying alternative  
52  
53 286 treatments.<sup>10 34</sup> However, an increasing feeling of powerlessness was emphasized if the  
54  
55 287 fight, in the form of these actions and treatments, did not meet the hope of a cure.<sup>21 23 26 34</sup>  
56  
57

1  
2  
3 288 As the disease progressed and life went on, most next of kin accepted the diagnosis,  
4  
5 289 prognosis, and a new pattern to everyday life.<sup>10 26 28 30 34</sup> There was a striving for normality,  
6  
7 290 starting with recommencing hobbies, work, and school for children.<sup>10 26 28 30 31 33 34 36</sup> This  
8  
9 291 was particularly important within families with children. At the same time, accepting  
10  
11 292 disease progression or a bad diagnosis was most challenging when the patient was a  
12  
13 293 child.<sup>34</sup>  
14  
15  
16  
17

## 18 294 **DISCUSSION**

19  
20  
21 295 This metasynthesis aimed to explore those factors and strategies that enhanced the ability  
22  
23 296 of next of kin to cope with their experience as the next of kin of a person with a brain  
24  
25 297 tumor. Valuable coping factors included personal characteristics, finding meaning in the  
26  
27 298 situation, external support, hope and religion, and interlocutors. Strategies to manage the  
28  
29 299 situation involved regaining control, being proactive, and acceptance.<sup>14 38</sup>  
30  
31  
32  
33 300 Being the next of kin to a person with a brain tumor is considered to be a negative stressor  
34  
35 301 because of the challenging life situation and care tasks. Nevertheless, several next of kin  
36  
37 302 included in the metasynthesis expressed a desire to fight the disease and to gain control  
38  
39 303 over the situation. This is described by Lazarus and Folkman<sup>14</sup> as a secondary assessment  
40  
41 304 of the situation, in which the next of kin decide which measures to implement. One such  
42  
43 305 measure could be to gain personal control—one of the most important and stress-reducing  
44  
45 306 personal strategies available.<sup>14</sup>  
46  
47  
48  
49 307 A possible explanation for the proactive attitude of next of kin toward the disease may be  
50  
51 308 their obligation and commitment to the patient. Commitment is an expression of something  
52  
53 309 of great importance and can cause one to be willing to meet threats and challenges that he  
54  
55 310 or she would otherwise avoid.<sup>14</sup> However, our findings revealed that the experience of  
56  
57  
58  
59  
60

1  
2  
3 311 contributing to something meaningful, not the obligation to do so, promoted coping in the  
4  
5 312 situation. We consider that this is caused by the fact that obligation does not automatically  
6  
7 313 make an action meaningful, but rather that it can be experienced as a compulsion. This  
8  
9 314 assumption is strengthened by the findings that the tasks as next of kin could arouse  
10  
11 315 emotions such as anger and aversion to the patient and to the diagnosis, rather than coping.  
12  
13 316 Several studies refer to the same ambivalent experience regarding commitment and  
14  
15 317 attitudes toward being a next of kin.<sup>39 40</sup>  
16  
17 318 External support was the factor that most relatives emphasized as promoting coping. It was  
18  
19 319 described as invaluable, which was also confirmed in other studies,<sup>41 42</sup> and in Lazarus and  
20  
21 320 Folkman's transactional stress theory.<sup>14</sup> At the same time, in both this metasynthesis and in  
22  
23 321 other studies, next of kin voiced a strong desire and longing for even greater external  
24  
25 322 support.<sup>41 42</sup> The findings of the metasynthesis also showed that the configuration and  
26  
27 323 arrangement of the support, especially that given by health-care providers is of great  
28  
29 324 importance. An explanation for the next of kin's experience of unmet needs might be lack  
30  
31 325 of knowledge among health-care providers about how to assist in due course. This may  
32  
33 326 indicate that in some cases health-care providers should pay more attention to offer support  
34  
35 327 in line with individual needs of the next of kin and for the care situations.  
36  
37 328 The findings of this metasynthesis show that several next of kin considered hope to be an  
38  
39 329 important coping factor, especially during the disease trajectory. Hope has also been  
40  
41 330 shown to be an extensional coping factor in several studies,<sup>43 44</sup> and transactional stress  
42  
43 331 theory states that faith and hope are two of the most important personal factors in the  
44  
45 332 cognitive assessment of stressors.<sup>14 38</sup> Furthermore, according to Lazarus and Folkman,<sup>14</sup>  
46  
47 333 the two factors are strongly related, which is consistent with the findings of our  
48  
49 334 metasynthesis. For several next of kin, hope was strongly grounded in religion. This was  
50  
51  
52  
53  
54  
55  
56  
57  
58  
59  
60

1  
2  
3 335 especially prominent in the studies conducted in the palliative phase, which indicated that  
4  
5 336 faith is strengthened when there is no hope of curative treatment. The same pattern has also  
6  
7 337 been reported in other studies describing cancer patients' experiences of palliative care.<sup>45 46</sup>  
8  
9  
10 338  
11  
12  
13 339 As the disease progressed, several next of kin accepted the diagnosis and its burden. Their  
14  
15 340 fight against the disease diminished to some extent, and the relatives instead tried to  
16  
17 341 "normalize" everyday life as much as possible. Similar acceptance is also reported by next  
18  
19 342 of kin of other cancer patients, especially in the palliative phase.<sup>47 48</sup> Lazarus and Folkman  
20  
21 343 describe this as a reassessment, referring to a changed cognitive assessment of the stressor  
22  
23 344 based on new information from the environment and/or the person.<sup>14</sup>  
24  
25  
26  
27

### 28 345 **Strengths and limitations**

29  
30  
31 346 A strength of this metasynthesis is that the primary search in the databases was conducted  
32  
33 347 with the assistance of an experienced librarian, in an attempt to ensure that as many as  
34  
35 348 possible of the relevant studies were included.<sup>49</sup> Furthermore, most of the included studies  
36  
37 349 were of high methodological quality (see Table 2). Our sample was also highly  
38  
39 350 multicultural (see Table 1). This attribute strengthens the validity of the metasynthesis  
40  
41 351 since geographical origin could have affected the study sample because of different  
42  
43 352 participant backgrounds related to different welfare and health-care systems, cultures,  
44  
45 353 and/or religions.

46  
47  
48  
49  
50 354 A limitation of our metasynthesis is that one of the 72 articles intended to be read in full  
51  
52 355 text could not be obtained.<sup>50</sup> The formation of the subthemes is also a possible limitation.  
53  
54 356 Some of the subthemes, or parts of their content, could have been categorized in the other  
55  
56 357 main theme. Both main themes and subthemes overlap in several cases, and we have read

1  
2  
3 358 similar studies<sup>26 30</sup> where the findings are categorized differently than in our metasynthesis.  
4  
5 359 We chose to be true to the informants' statements and designated the location based on the  
6  
7 360 informants' way of speaking and description of the experience. Another possible limitation  
8  
9 361 is that our sample consisted mainly of women (see Table 1). A more heterogeneous sample  
10  
11 362 might have revealed more nuanced findings and different experiences of the role of the  
12  
13 363 next of kin.  
14  
15  
16  
17

## 18 364 **CONCLUSION**

19  
20  
21 365 The findings of this metasynthesis show that next of kin experience and use a range of  
22  
23 366 coping factors and strategies in their role. Their experience is marked by individual  
24  
25 367 differences. It is of great importance that health-care providers offer assistance that is  
26  
27 368 individually adapted for these coping factors and strategies because this can reduce stress  
28  
29 369 among the next of kin. The coping experience seems to go through phases, and further  
30  
31 370 information is needed to understand fully how and when the various factors and strategies  
32  
33 371 are used as the disease progresses. Longitudinal studies would therefore be of particular  
34  
35 372 interest in this field.  
36  
37  
38  
39  
40  
41  
42  
43

## 44 374 **Supplementary information**

45  
46  
47 375 The manuscript has been edited by OnLine English (<https://www.oleng.com.au>) to comply  
48  
49 376 with international publishing guidelines.  
50  
51  
52  
53  
54  
55  
56  
57  
58  
59  
60

1  
2  
3 377 **Acknowledgments**  
4  
5

6 378 Librarian Ellen Sejersted at the University of Agder assisted in the development of the  
7  
8 379 search strategy.  
9  
10

11  
12 380 **Authors' contributions**  
13  
14

15 381 AWL and GR designed the research project and developed the research plan. Librarian  
16  
17 382 Ellen Sejersted at the University of Agder and AWL were responsible for the literature  
18  
19 383 search, while AWL and GR were responsible for the analysis. Both authors were involved  
20  
21 384 in the screening and inclusion of the studies, reviewed the manuscript, and contributed to  
22  
23 385 the revision of the paper. Both authors read and approved the final version of the paper.  
24  
25  
26

27  
28 386 **Funding**  
29  
30

31 387 This research did not receive grants from any funding agency in the public, commercial, or  
32  
33 388 not-for-profit sectors.  
34  
35

36  
37 389 **Competing interests**  
38  
39

40 390 The authors declare that they have no competing interests.  
41  
42

43 391 **Patient consent for publication**  
44  
45

46 392 Not required  
47  
48

49 393 **Ethics approval**  
50  
51

52 394 Ethical approval was not required, as no primary data were collected as part of this study.  
53  
54

55 395 **Data availability**  
56  
57

58 396 Data are available on reasonable request.  
59  
60

397 **References**

398

- 399 1. World Cancer Research Fund. Worldwide cancer data 2018 [Available from:  
400 <https://www.wcrf.org/dietandcancer/cancer-trends/worldwide-cancer-data>.  
401 2. Arber A, Faithfull S, Plaskota M, et al. A study of patients with a primary malignant  
402 brain tumour and their carers: symptoms and access to services. *Int J Palliat Nurs*  
403 2010;16(1):24-30. doi: 10.12968/ijpn.2010.16.1.46180 [published Online First:  
404 2010/01/22]  
405 3. Voß H, Scholz-Kreisel P, Richter C, et al. Development of screening questions for  
406 doctor-patient consultation assessing the quality of life and psychosocial burden of  
407 glioma patients: an explorative study. *Qual Life Res* 2021;30(5):1513-22. doi:  
408 10.1007/s11136-021-02756-x [published Online First: 2021/02/01]  
409 4. Armstrong TS, Dirven L, Arons D, et al. Glioma patient-reported outcome assessment in  
410 clinical care and research: a Response Assessment in Neuro-Oncology  
411 collaborative report. *Lancet Oncol* 2020;21(2):e97-e103. doi: 10.1016/s1470-  
412 2045(19)30796-x [published Online First: 2020/02/03]  
413 5. Noll K, King AL, Dirven L, et al. Neurocognition and Health-Related Quality of Life  
414 Among Patients with Brain Tumors. *Hematol Oncol Clin North Am*  
415 2022;36(1):269-82. doi: 10.1016/j.hoc.2021.08.011 [published Online First:  
416 2021/10/30]  
417 6. Helvoirt Rv, Holt, M. H., Bjerva, J., Langfeldt, B., Throndsen, A., & Drangsholt, L. K. .  
418 Dagpost-basert multidisiplinær tilbud for pasienter med høygradig gliom: første  
419 erfaringer ved Senter for kreftbehandling (SFK), Kristiansand. *ONKONYTT* 2016  
420 7. Applebaum AJ, Kryza-Lacombe M, Buthorn J, et al. Existential distress among  
421 caregivers of patients with brain tumors: a review of the literature. *Neurooncol*  
422 *Pract* 2016;3(4):232-44. doi: 10.1093/nop/npv060 [published Online First:  
423 2016/12/01]  
424 8. Geng HM, Chuang DM, Yang F, et al. Prevalence and determinants of depression in  
425 caregivers of cancer patients: A systematic review and meta-analysis. *Medicine*  
426 *(Baltimore)* 2018;97(39):e11863. doi: 10.1097/md.00000000000011863 [published  
427 Online First: 2018/10/04]  
428 9. Cavers D, Hacking B, Erridge SE, et al. Social, psychological and existential well-being  
429 in patients with glioma and their caregivers: a qualitative study. *Cmaj*  
430 2012;184(7):E373-82. doi: 10.1503/cmaj.111622 [published Online First:  
431 2012/03/21]  
432 10. Russell B, Collins A, Dowling A, et al. Predicting distress among people who care for  
433 patients living longer with high-grade malignant glioma. *Support Care Cancer*  
434 2016;24(1):43-51. doi: 10.1007/s00520-015-2739-0 [published Online First:  
435 2015/04/26]  
436 11. Wasner M, Paal P, Borasio GD. Psychosocial care for the caregivers of primary  
437 malignant brain tumor patients. *J Soc Work End Life Palliat Care* 2013;9(1):74-95.  
438 doi: 10.1080/15524256.2012.758605 [published Online First: 2013/02/27]  
439 12. Applebaum AJ, Buda K, Kryza-Lacombe M, et al. Prognostic awareness and  
440 communication preferences among caregivers of patients with malignant glioma.

- 1  
2  
3 441 *Psychooncology* 2018;27(3):817-23. doi: 10.1002/pon.4581 [published Online  
4 442 First: 2017/11/11]
- 5 443 13. Cavers D, Hacking B, Erridge SC, et al. Adjustment and support needs of glioma  
6 444 patients and their relatives: serial interviews. *Psychooncology* 2013;22(6):1299-  
7 445 305. doi: 10.1002/pon.3136 [published Online First: 2012/08/01]
- 8 446 14. Lazarus RS, Folkman S. Stress, appraisal, and coping. New York: Springer 1984.
- 9 447 15. Crooms RC, Goldstein NE, Diamond EL, et al. Palliative Care in High-Grade Glioma:  
10 448 A Review. *Brain Sci* 2020;10(10) doi: 10.3390/brainsci10100723 [published  
11 449 Online First: 2020/10/18]
- 12 450 16. Sandelowski M, Barroso J. Handbook for synthesizing qualitative research. New York:  
13 451 Springer 2007.
- 14 452 17. Ouzzani M, Hammady, H., Fedorowicz, Z., & Elmagarmid, A. . Systematic Reviews  
15 453 2016 [Available from: <https://rayyan.qcri.org/welcome>.]
- 16 454 18. Lindseth A, Norberg A. A phenomenological hermeneutical method for researching  
17 455 lived experience. *Scand J Caring Sci* 2004;18(2):145-53. doi: 10.1111/j.1471-  
18 456 6712.2004.00258.x [published Online First: 2004/05/19]
- 19 457 19. QSR International. NVIVO 2020 [Available from:  
20 458 <https://www.qsrinternational.com/nvivo-qualitative-data-analysis-software/home>.]
- 21 459 20. Schubart JR, Kinzie MB, Farace E. Caring for the brain tumor patient: family caregiver  
22 460 burden and unmet needs. *Neuro Oncol* 2008;10(1):61-72. doi: 10.1215/15228517-  
23 461 2007-040 [published Online First: 2007/11/13]
- 24 462 21. Piil K, Juhler M, Jakobsen J, et al. Daily Life Experiences of Patients With a High-  
25 463 Grade Glioma and Their Caregivers: A Longitudinal Exploration of Rehabilitation  
26 464 and Supportive Care Needs. *J Neurosci Nurs* 2015;47(5):271-84. doi:  
27 465 10.1097/jnn.000000000000158 [published Online First: 2015/09/09]
- 28 466 22. Janda M, Eakin EG, Bailey L, et al. Supportive care needs of people with brain  
29 467 tumours and their carers. *Support Care Cancer* 2006;14(11):1094-103. doi:  
30 468 10.1007/s00520-006-0074-1 [published Online First: 2006/05/20]
- 31 469 23. Coolbrandt A, Sterckx W, Clement P, et al. Family Caregivers of Patients With a High-  
32 470 Grade Glioma: A Qualitative Study of Their Lived Experience and Needs Related  
33 471 to Professional Care. *Cancer Nurs* 2015;38(5):406-13. doi:  
34 472 10.1097/ncc.0000000000000216 [published Online First: 2014/12/19]
- 35 473 24. Arber A, Hutson N, de Vries K, et al. Finding the right kind of support: a study of  
36 474 carers of those with a primary malignant brain tumour. *Eur J Oncol Nurs*  
37 475 2013;17(1):52-8. doi: 10.1016/j.ejon.2012.01.008 [published Online First:  
38 476 2012/03/03]
- 39 477 25. Edvardsson T, Ahlström G. Being the next of kin of a person with a low-grade glioma.  
40 478 *Psychooncology* 2008;17(6):584-91. doi: 10.1002/pon.1276 [published Online  
41 479 First: 2007/10/25]
- 42 480 26. Wideheim AK, Edvardsson T, Pålsson A, et al. A family's perspective on living with a  
43 481 highly malignant brain tumor. *Cancer Nurs* 2002;25(3):236-44. doi:  
44 482 10.1097/00002820-200206000-00012 [published Online First: 2002/06/01]
- 45 483 27. Huang TY, Mu PF, Chen YW. The Lived Experiences of Parents Having a Child With  
46 484 a Brain Tumor During the Shared Decision-Making Process of Treatment. *Cancer*  
47 485 *Nurs* 2021 doi: 10.1097/ncc.0000000000000979 [published Online First:  
48 486 2021/09/02]



- 1  
2  
3 487 28. Strang S, Strang P. Spiritual thoughts, coping and 'sense of coherence' in brain tumour  
4 488 patients and their spouses. *Palliat Med* 2001;15(2):127-34. doi:  
5 489 10.1191/026921601670322085 [published Online First: 2001/04/17]  
6  
7 490 29. Shortman RI, Beringer A, Penn A, et al. The experience of mothers caring for a child  
8 491 with a brain tumour. *Child Care Health Dev* 2013;39(5):743-9. doi:  
9 492 10.1111/cch.12005 [published Online First: 2012/09/14]  
10 493 30. Cutillo A, Zimmerman K, Davies S, et al. Coping strategies used by caregivers of  
11 494 children with newly diagnosed brain tumors. *J Neurosurg Pediatr* 2018;23(1):30-  
12 495 39. doi: 10.3171/2018.7.Peds18296 [published Online First: 2018/11/30]  
13 496 31. Schmer C, Ward-Smith P, Latham S, et al. When a family member has a malignant  
14 497 brain tumor: the caregiver perspective. *J Neurosci Nurs* 2008;40(2):78-84. doi:  
15 498 10.1097/01376517-200804000-00006 [published Online First: 2008/05/17]  
16 499 32. Tastan S, Kose G, Iyigun E, et al. Experiences of the relatives of patients undergoing  
17 500 cranial surgery for a brain tumor: a descriptive qualitative study. *J Neurosci Nurs*  
18 501 2011;43(2):77-84. doi: 10.1097/jnn.0b013e31820c94da [published Online First:  
19 502 2011/04/15]  
20 503 33. Zelcer S, Cataudella D, Cairney AE, et al. Palliative care of children with brain tumors:  
21 504 a parental perspective. *Arch Pediatr Adolesc Med* 2010;164(3):225-30. doi:  
22 505 10.1001/archpediatrics.2009.284 [published Online First: 2010/03/03]  
23 506 34. Lou HL, Mu PF, Wong TT, et al. A Retrospective Study of Mothers' Perspectives of  
24 507 the Lived Experience of Anticipatory Loss of a Child From a Terminal Brain  
25 508 Tumor. *Cancer Nurs* 2015;38(4):298-304. doi: 10.1097/ncc.000000000000178  
26 509 [published Online First: 2014/07/11]  
27 510 35. Ownsworth T, Goadby E, Chambers SK. Support after brain tumor means different  
28 511 things: family caregivers' experiences of support and relationship changes. *Front*  
29 512 *Oncol* 2015;5:33. doi: 10.3389/fonc.2015.00033 [published Online First:  
30 513 2015/03/03]  
31 514 36. Hricik A, Donovan H, Bradley SE, et al. Changes in caregiver perceptions over time in  
32 515 response to providing care for a loved one with a primary malignant brain tumor.  
33 516 *Oncol Nurs Forum* 2011;38(2):149-55. doi: 10.1188/11.Onf.149-155 [published  
34 517 Online First: 2011/03/02]  
35 518 37. Lipsman N, Skanda A, Kimmelman J, et al. The attitudes of brain cancer patients and  
36 519 their caregivers towards death and dying: a qualitative study. *BMC Palliat Care*  
37 520 2007;6:7. doi: 10.1186/1472-684x-6-7 [published Online First: 2007/11/13]  
38 521 38. Lazarus RS. Stress og følelser: en syntese. København: Akademisk Forlag 2006.  
39 522 39. Lin IF, Fee HR, Wu HS. NEGATIVE AND POSITIVE CAREGIVING  
40 523 EXPERIENCES: A CLOSER LOOK AT THE INTERSECTION OF GENDER  
41 524 AND RELATIOSHIPS. *Fam Relat* 2012;61(2):343-58. doi: 10.1111/j.1741-  
42 525 3729.2011.00692.x [published Online First: 2012/05/01]  
43 526 40. Daniela Doulavince A, Altamira Pereira da Silva R, Regina Aparecida Garcia de L, et  
44 527 al. Conceptions of care and feelings of the caregiver of children with  
45 528 cancer/Concepções de cuidado e sentimentos do cuidador de crianças com câncer.  
46 529 *Acta paulista de enfermagem* 2013;26(6):542.  
47 530 41. Nicklin E, Velikova G, Hulme C, et al. Long-term issues and supportive care needs of  
48 531 adolescent and young adult childhood brain tumour survivors and their caregivers:  
49 532 A systematic review. *Psychooncology* 2019;28(3):477-87. doi: 10.1002/pon.4989  
50 533 [published Online First: 2019/01/19]  
51  
52  
53  
54  
55  
56  
57  
58  
59  
60

- 1  
2  
3 534 42. Sterckx W, Coolbrandt A, Dierckx de Casterlé B, et al. The impact of a high-grade  
4 535 glioma on everyday life: a systematic review from the patient's and caregiver's  
5 536 perspective. *Eur J Oncol Nurs* 2013;17(1):107-17. doi: 10.1016/j.ejon.2012.04.006  
6 537 [published Online First: 2012/06/05]  
7  
8 538 43. Holtslander LF, Duggleby W, Williams AM, et al. The experience of hope for informal  
9 539 caregivers of palliative patients. *J Palliat Care* 2005;21(4):285-91. [published  
10 540 Online First: 2006/02/18]  
11 541 44. Leite A, Garcia-Vivar C, Neris RR, et al. The experience of hope in families of  
12 542 children and adolescents living with chronic illness: A thematic synthesis of  
13 543 qualitative studies. *J Adv Nurs* 2019;75(12):3246-62. doi: 10.1111/jan.14129  
14 544 [published Online First: 2019/06/27]  
15 545 45. Lina Mahayati S, Allenidekania, Happy H. Spirituality in adolescents with cancer.  
16 546 *Enferm Clin* 2018;28 Suppl 1:31-35. doi: 10.1016/s1130-8621(18)30032-9  
17 547 [published Online First: 2018/04/14]  
18 548 46. Alidina K, Tettero I. Exploring the therapeutic value of hope in palliative nursing.  
19 549 *Palliat Support Care* 2010;8(3):353-8. doi: 10.1017/s1478951510000155  
20 550 [published Online First: 2010/09/30]  
21 551 47. Wang SC, Wu LM, Yang YM, et al. The experience of parents living with a child with  
22 552 cancer at the end of life. *Eur J Cancer Care (Engl)* 2019;28(4):e13061. doi:  
23 553 10.1111/ecc.13061 [published Online First: 2019/04/25]  
24 554 48. Hisamatsu M, & Niwa, S. . Support factors of coping with anxiety in families of  
25 555 patients with terminal cancer. *Journal of Japan Academy of Nursing Science*  
26 556 2011;31(1):58-67. doi: 10.5630/jans.31.1\_58  
27 557 49. Aromataris EM, Z (Eds.). Joanna Briggs Institute Reviewer's Manual 2017 [Available  
28 558 from:  
29 559 <https://wiki.joannabriggs.org/display/MANUAL/JBI+Reviewer%27s+Manual>  
30 560 50. Salander P. Brain tumor as a threat to life and personality: The spouse's perspective.  
31 561 *Journal of Psychosocial Oncology* 1996;14(3):1-18.  
32  
33  
34  
35  
36 562  
37  
38  
39  
40  
41  
42  
43  
44  
45  
46  
47  
48  
49  
50  
51  
52  
53  
54  
55  
56  
57  
58  
59  
60

**Table 1: Critical appraisal of the included studies.**

| Criterion<br>Y = yes<br>N = no<br>C = can't tell<br>V = valuable<br>NV = not valuable | 1. Was there a clear statement of the aims? | 2. Is a qualitative methodology appropriate? | 3. Was the research design appropriate? | 4. Was the recruitment strategy appropriate? | 5. Were the data collected in a way that addressed the research issue? | 6. Has the relationship between researcher and participants been adequately considered? | 7. Have ethical issues been taken into consideration? | 8. Was the data analysis sufficiently rigorous? | 9. Is there a clear statement of findings? | 10. How valuable is the research? | Impact factor |
|---------------------------------------------------------------------------------------|---------------------------------------------|----------------------------------------------|-----------------------------------------|----------------------------------------------|------------------------------------------------------------------------|-----------------------------------------------------------------------------------------|-------------------------------------------------------|-------------------------------------------------|--------------------------------------------|-----------------------------------|---------------|
| Arber et al. (2010) <sup>2</sup>                                                      | Y                                           | Y                                            | C                                       | C                                            | Y                                                                      | N                                                                                       | Y                                                     | C                                               | Y                                          | V                                 | Not found     |
| Arber et al. (2013) <sup>24</sup>                                                     | Y                                           | Y                                            | Y                                       | Y                                            | Y                                                                      | N                                                                                       | Y                                                     | Y                                               | Y                                          | V                                 | 1.697         |
| Coolbrant et al. (2015) <sup>23</sup>                                                 | Y                                           | Y                                            | Y                                       | Y                                            | Y                                                                      | C                                                                                       | Y                                                     | Y                                               | Y                                          | V                                 | 2.022         |
| Cuttilo et al. (2018) <sup>30</sup>                                                   | Y                                           | Y                                            | Y                                       | Y                                            | Y                                                                      | Y                                                                                       | N                                                     | Y                                               | C                                          | V                                 | 2.170         |
| Edvardsson & Ahlström (2008) <sup>25</sup>                                            | Y                                           | Y                                            | Y                                       | Y                                            | Y                                                                      | N                                                                                       | N                                                     | Y                                               | Y                                          | V                                 | 3.470         |
| Janda et al. (2006) <sup>22</sup>                                                     | Y                                           | Y                                            | Y                                       | Y                                            | Y                                                                      | N                                                                                       | Y                                                     | Y                                               | Y                                          | V                                 | 2.754         |
| Huang et al. (2021) <sup>27</sup>                                                     | Y                                           | Y                                            | Y                                       | Y                                            | Y                                                                      | N                                                                                       | Y                                                     | Y                                               | Y                                          | V                                 | 2.592         |
| Lipsman et al. (2007) <sup>37</sup>                                                   | Y                                           | Y                                            | Y                                       | Y                                            | Y                                                                      | N                                                                                       | Y                                                     | Y                                               | Y                                          | V                                 | 2.922         |
| Lou et al. (2015) <sup>34</sup>                                                       | C                                           | Y                                            | Y                                       | C                                            | Y                                                                      | N                                                                                       | N                                                     | C                                               | Y                                          | V                                 | 2.022         |
| Owensworth et al. (2015) <sup>35</sup>                                                | Y                                           | Y                                            | Y                                       | Y                                            | Y                                                                      | C                                                                                       | C                                                     | Y                                               | Y                                          | V                                 | 4.137         |
| Piil et al. (2015) <sup>21</sup>                                                      | Y                                           | Y                                            | Y                                       | Y                                            | Y                                                                      | C                                                                                       | Y                                                     | Y                                               | Y                                          | V                                 | 1.096         |
| Russel et al. (2016) <sup>10</sup>                                                    | Y                                           | Y                                            | Y                                       | Y                                            | Y                                                                      | N                                                                                       | Y                                                     | Y                                               | Y                                          | V                                 | 1.197         |
| Schmer et al. (2008) <sup>31</sup>                                                    | Y                                           | Y                                            | N                                       | Y                                            | N                                                                      | N                                                                                       | Y                                                     | N                                               | Y                                          | V                                 | 1.096         |

1  
2  
3  
4  
5  
6  
7  
8  
9  
10  
11  
12  
13  
14  
15  
16  
17  
18  
19  
20  
21  
22  
23  
24  
25  
26  
27  
28  
29  
30  
31  
32  
33  
34  
35  
36  
37  
38  
39  
40  
41  
42  
43  
44  
45  
46

|                                      |   |   |   |   |   |   |   |   |   |   |       |
|--------------------------------------|---|---|---|---|---|---|---|---|---|---|-------|
| Schubart et al. (2008) <sup>20</sup> | C | Y | Y | Y | Y | N | N | Y | Y | V | 3.470 |
| Sherwood et al. (2011) <sup>36</sup> | Y | Y | Y | Y | C | Y | N | Y | N | V | 1.438 |
| Shortman et al. (2013)               | Y | Y | Y | C | C | N | Y | N | Y | V | 1.918 |
| Strang & Strang (2001) <sup>28</sup> | C | C | Y | N | Y | N | Y | Y | Y | V | 4.956 |
| Tastan et al. (2011) <sup>32</sup>   | Y | Y | N | Y | Y | N | Y | N | Y | V | 1.096 |
| Wideheim et al. (2002) <sup>26</sup> | Y | Y | Y | Y | Y | N | C | Y | Y | V | 2.022 |
| Zelcer et al. (2010) <sup>33</sup>   | Y | Y | Y | Y | Y | N | C | Y | Y | V | 5.731 |

For peer review only

**Table 2: Thematic overview showing the studies' contribution to the different themes and subthemes.**

| Author                                    | Coping factors           |            |                  |                   |              | Coping mechanisms |       |        |
|-------------------------------------------|--------------------------|------------|------------------|-------------------|--------------|-------------------|-------|--------|
|                                           | Personal characteristics | Meaningful | External support | Hope and religion | Interlocutor | Gain control      | Fight | Accept |
| Arber et al. (2010) <sup>2</sup>          |                          |            | V                | V                 | V            |                   |       |        |
| Arber et al. (2013) <sup>24</sup>         |                          |            | V                |                   | V            |                   |       |        |
| Coolbrandt et al. (2015) <sup>23</sup>    |                          | V          | V                | V                 | V            | V                 |       |        |
| Cutillo et al. (2018) <sup>30</sup>       |                          |            | V                | V                 | V            | V                 |       | V      |
| Edvardson & Ahlström (2008) <sup>25</sup> | V                        | V          | V                | V                 | V            | V                 | V     |        |
| Janda et al. (2006) <sup>22</sup>         |                          |            | V                | V                 | V            | V                 |       |        |
| Huang et al. (2021) <sup>27</sup>         |                          |            | V                | V                 | V            | V                 |       |        |
| Lipsman et al. (2007) <sup>37</sup>       | V                        |            |                  | V                 | V            | V                 |       |        |
| Lou et al. (2015) <sup>34</sup>           |                          |            | V                | V                 | V            | V                 | V     | V      |
| Owensworth et al. (2015) <sup>35</sup>    |                          | V          | V                |                   | V            | V                 |       |        |
| Piil et al. (2015) <sup>21</sup>          |                          | V          | V                | V                 | V            | V                 | V     |        |
| Russell et al. (2016) <sup>10</sup>       |                          |            | V                | V                 |              | V                 | V     | V      |
| Schmer et al. (2008) <sup>31</sup>        |                          | V          | V                |                   | V            |                   |       | V      |
| Schubart et al. (2008) <sup>20</sup>      |                          | V          | V                | V                 |              | V                 |       |        |
| Sherwood et al. (2011) <sup>36</sup>      |                          |            |                  |                   | V            | V                 |       | V      |
| Shortman et al. (2013) <sup>36</sup>      | V                        | V          | V                |                   |              | V                 |       |        |

|    |                                      |   |   |   |   |   |   |   |
|----|--------------------------------------|---|---|---|---|---|---|---|
| 1  |                                      |   |   |   |   |   |   |   |
| 2  |                                      |   |   |   |   |   |   |   |
| 3  |                                      |   |   |   |   |   |   |   |
| 4  | Strang & Strang (2001) <sup>28</sup> | V | V |   |   |   |   | V |
| 5  |                                      |   |   |   |   |   |   |   |
| 6  | Tastan et al. (2011) <sup>32</sup>   |   | V |   |   | V |   |   |
| 7  |                                      |   |   |   |   |   |   |   |
| 8  |                                      |   |   |   |   |   |   |   |
| 9  | Wideheim et al. (2002) <sup>26</sup> |   | V | V | V |   | V | V |
| 10 |                                      |   |   |   |   |   |   |   |
| 11 | Zelcer et al. (2010) <sup>33</sup>   |   | V | V |   | V |   | V |
| 12 |                                      |   |   |   |   |   |   |   |
| 13 |                                      |   |   |   |   |   |   |   |
| 14 |                                      |   |   |   |   |   |   |   |
| 15 |                                      |   |   |   |   |   |   |   |
| 16 |                                      |   |   |   |   |   |   |   |
| 17 |                                      |   |   |   |   |   |   |   |
| 18 |                                      |   |   |   |   |   |   |   |
| 19 |                                      |   |   |   |   |   |   |   |
| 20 |                                      |   |   |   |   |   |   |   |
| 21 |                                      |   |   |   |   |   |   |   |
| 22 |                                      |   |   |   |   |   |   |   |
| 23 |                                      |   |   |   |   |   |   |   |
| 24 |                                      |   |   |   |   |   |   |   |
| 25 |                                      |   |   |   |   |   |   |   |
| 26 |                                      |   |   |   |   |   |   |   |
| 27 |                                      |   |   |   |   |   |   |   |
| 28 |                                      |   |   |   |   |   |   |   |
| 29 |                                      |   |   |   |   |   |   |   |
| 30 |                                      |   |   |   |   |   |   |   |
| 31 |                                      |   |   |   |   |   |   |   |
| 32 |                                      |   |   |   |   |   |   |   |
| 33 |                                      |   |   |   |   |   |   |   |
| 34 |                                      |   |   |   |   |   |   |   |
| 35 |                                      |   |   |   |   |   |   |   |
| 36 |                                      |   |   |   |   |   |   |   |
| 37 |                                      |   |   |   |   |   |   |   |
| 38 |                                      |   |   |   |   |   |   |   |
| 39 |                                      |   |   |   |   |   |   |   |
| 40 |                                      |   |   |   |   |   |   |   |
| 41 |                                      |   |   |   |   |   |   |   |
| 42 |                                      |   |   |   |   |   |   |   |
| 43 |                                      |   |   |   |   |   |   |   |
| 44 |                                      |   |   |   |   |   |   |   |
| 45 |                                      |   |   |   |   |   |   |   |
| 46 |                                      |   |   |   |   |   |   |   |

For peer review only

1  
2  
3 Figure legend: Figure 1. Flow chart of the inclusion process  
4  
5  
6  
7  
8  
9  
10  
11  
12  
13  
14  
15  
16  
17  
18  
19  
20  
21  
22  
23  
24  
25  
26  
27  
28  
29  
30  
31  
32  
33  
34  
35  
36  
37  
38  
39  
40  
41  
42  
43  
44  
45  
46  
47  
48  
49  
50  
51  
52  
53  
54  
55  
56  
57  
58  
59  
60

For peer review only



## PRISMA 2009 Flow Diagram

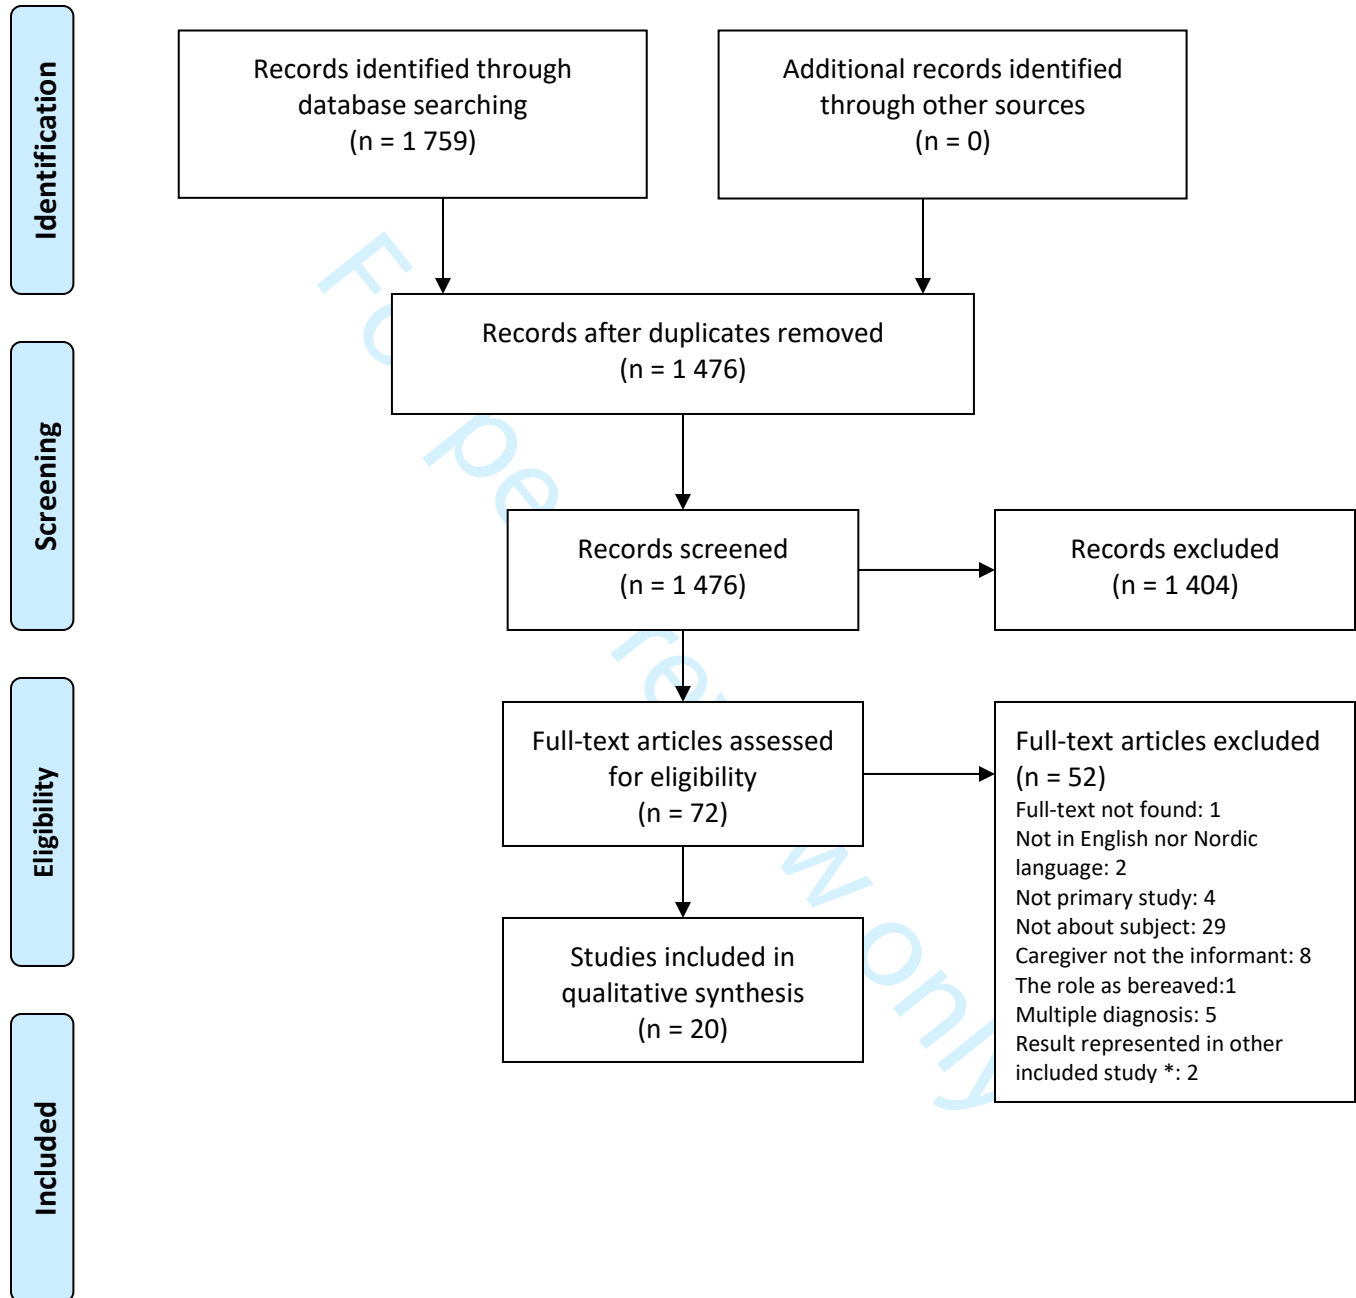

Figure 1. Flow chart of the inclusion process

From: Moher D, Liberati A, Tetzlaff J, Altman DG, The PRISMA Group (2009). Preferred Reporting Items for Systematic Reviews and Meta-Analyses: The PRISMA Statement. PLoS Med 6(7): e1000097. doi:10.1371/journal.pmed1000097

For more information, visit [www.prisma-statement.org](http://www.prisma-statement.org).

For peer review only - <http://bmjopen.bmj.com/site/about/guidelines.xhtml>



The search strategy for the metasynthesis:

To search the PsycINFO database, we used the following terms: *((qualitative adj2 (research\* or design\* or stud\* or method\*)) or hermeneutic\* or “grounded theory” or “meta synthes\*” or metasynthesis\* or metaethnograph\* or interview\* or phenomenolog\* or thematic or themes or experience\*).ti,ab,hw,id. or exp qualitative methods or phenomenology AND (caregiver\* or famil\* or next of kin\* or relatives or spous\* or wife or husband\* or sibling\* or sister\* or brother\* or dependent\* or loved one\* or parent\* or mother\* or father\* or carer\* or care giver\*).ti,ab,hw,id. AND glioma\*.ti,ab,hw,id. OR (brain adj2 (cancer or neoplasm\* or tumor\*).ti,ab,hw,id.*

In Medline and CHINAL, we used the following terms: *caregiver\* OR famil\* OR “next of kin\*” OR relatives OR spous\* OR wife OR husband\* OR sibling\* OR brother\* OR sister\* OR dependent\* OR “loved one\*” OR parent\* OR mother\* OR father\* OR carer\* OR “care giver\*” AND (MH “Qualitative Studies+”) OR (MH “Qualitative Research+”) OR (MH “Grounded Theory”) OR Interview\* OR experienc\* OR phenomenolog\* OR (qualitative WI (research\* OR method\* OR design\* OR stud\*)) OR themes OR thematic OR “audio recording” OR audiorecording OR metasynthes\* OR “meta synthes\*” OR metaetnograph\* AND (MH “Glioma+”) OR glioma OR gliomas OR glioblastom\* OR brain WI (cancer OR tumor\* or neoplasm\*).*

1  
2  
3  
4  
5  
6  
7  
8  
9  
10  
11  
12  
13  
14  
15  
16  
17  
18  
19  
20  
21  
22  
23  
24  
25  
26  
27  
28  
29  
30  
31  
32  
33  
34  
35  
36  
37  
38  
39  
40  
41  
42  
43  
44  
45  
46

**Supplementary materials 2: Characteristics of the included studies.**

| Author/year/country                                        | Focus                                                                                      | Type of brain tumor and stage of treatment at interview                                    | Recruitment                                         | Participants, sex, and relationship                               | Method/design               | Data collection/analysis                                                                         |
|------------------------------------------------------------|--------------------------------------------------------------------------------------------|--------------------------------------------------------------------------------------------|-----------------------------------------------------|-------------------------------------------------------------------|-----------------------------|--------------------------------------------------------------------------------------------------|
| Arber et al. (2010). <sup>2</sup><br>United Kingdom (UK).  | Caregivers' need for information.                                                          | Malignant *<br>Stage of treatment not described.                                           | Specialist hospital in England.                     | N = 22<br>M: 7 and F: 15<br>17 spouses<br>3 children<br>2 parents | Grounded theory.            | Semistructured interview/comparative method for generating categories and topics.                |
| Arber et al. (2013). <sup>24</sup><br>United Kingdom (UK). | Caregivers' need for support.                                                              | Malignant *<br>Stage of treatment not described.                                           | Recruited by a nurse at a cancer center in England. | N = 22<br>M: 7 and F: 15<br>17 spouses<br>3 children<br>2 parents | Grounded theory.            | Semistructured interview/comparative method for generating categories and topics.                |
| Coolbrandt et al. (2015). <sup>23</sup> Belgium.           | Caregivers' experience and need for support.                                               | High-grade *<br>Radiation or chemotherapy, or in the follow-up phase after such treatment. | University Hospital in Leuven.                      | N = 16<br>M: 6 and F: 10<br>13 partners<br>2 parents<br>1 friend  | Grounded theory.            | Semistructured interview/thematic analysis inspired by the Qualitative Analysis Guide of Leuven. |
| Cuttillo et al. (2018). <sup>30</sup><br>USA.              | Which strategies caregivers of children with a brain tumor use in the postoperative phase. | 15 benign.<br>25 malignant.<br>Newly diagnosed and newly operated.                         | Pediatric hospital in the USA.                      | N = 22<br>M: 3 and F: 19<br>All parents                           | Triangulating mixed-method. | Semistructured interview/thematic analysis.                                                      |

|                                                                                        |                                                     |                                                                                                          |                                                                                                                                              |                                                                  |                                                                                                                           |                   |                                                                                                                                            |
|----------------------------------------------------------------------------------------|-----------------------------------------------------|----------------------------------------------------------------------------------------------------------|----------------------------------------------------------------------------------------------------------------------------------------------|------------------------------------------------------------------|---------------------------------------------------------------------------------------------------------------------------|-------------------|--------------------------------------------------------------------------------------------------------------------------------------------|
| 1<br>2<br>3<br>4<br>5<br>6<br>7<br>8<br>9<br>10<br>11<br>12<br>13<br>14                | Edvardson & Ahlström (2008) <sup>25</sup> . Sweden. | Caregivers' experience.                                                                                  | 25 low-grade.<br>2 high-grade.<br>Stage of treatment not described.                                                                          | The patients had participated in an earlier study.               | N = 28<br>M: 8 and F: 20<br>15 partners, living together<br>3 partners, living apart<br>8 parents<br>1 sibling<br>1 child | Not described.    | Semistructured interview/qualitative content analysis and quantitative analysis of how the topics were distributed among the participants. |
| 15<br>16<br>17<br>18<br>19<br>20<br>21<br>22<br>23<br>24                               | Janda et al. (2006) <sup>22</sup> . Australia.      | The need of support for brain tumor patients and their caregivers.                                       | Different types *<br>Treatment phase not described, but time since diagnosis stated:<br>1–2 years: 22<br>5 years: 5<br>More than 5 years: 11 | Members of Queensland Cancer Fund's Brain Tumor Support Service. | N = 10 in focus group, n = 8 in semistructured interview<br>M: 4 and F: 18<br>13 partners<br>5 children                   | Qualitative.      | Focus group interview and semistructured interview/framework analysis.                                                                     |
| 25<br>26<br>27<br>28<br>29<br>30<br>31                                                 | Lipsman et al. (2007) <sup>37</sup> . Canada.       | The experience of brain tumor patients and their caregivers, and how it affects the choice of treatment. | Malignant *<br>Palliative phase.                                                                                                             | Recruited by a neurosurgeon.                                     | N = 22<br>Further participant information not described                                                                   | Qualitative.      | Semistructured interview/thematic analysis.                                                                                                |
| 32<br>33<br>34<br>35<br>36<br>37<br>38<br>39<br>40<br>41<br>42<br>43<br>44<br>45<br>46 | Lou et al. (2015) <sup>34</sup> . Taiwan.           | The experience and suffering of mothers waiting for their child to die from brain tumor.                 | Malignant *<br>All patients deceased.                                                                                                        | Not described.                                                   | N = 10<br>F: 10<br>All mothers                                                                                            | Phenomenological. | In-depth interview/Colaizzi's analysis method.                                                                                             |

1  
2  
3  
4  
5  
6  
7  
8  
9  
10  
11  
12  
13  
14  
15  
16  
17  
18  
19  
20  
21  
22  
23  
24  
25  
26  
27  
28  
29  
30  
31  
32  
33  
34  
35  
36  
37  
38  
39  
40  
41  
42  
43  
44  
45  
46

|                                                   |                                                                                                        |                                                                                                                                                                                            |                                        |                                                                                        |                               |                                                      |
|---------------------------------------------------|--------------------------------------------------------------------------------------------------------|--------------------------------------------------------------------------------------------------------------------------------------------------------------------------------------------|----------------------------------------|----------------------------------------------------------------------------------------|-------------------------------|------------------------------------------------------|
| Ownsworth et al. (2015). <sup>35</sup> Australia. | Caregivers' experience of support.                                                                     | 6 low-grade.<br>5 high-grade.<br>All underwent surgery and radiation or chemotherapy.<br>9 months – 22 years since diagnosis.                                                              | Had participated in a different study. | N = 11<br>M: 6 and F: 5<br>8 spouses<br>3 parents                                      | Phenomenological.             | Semistructured interview/thematic analysis.          |
| Piil et al. (2015). <sup>21</sup> Denmark.        | Brain tumor patients' and their caregivers' experience, and their need for rehabilitation and support. | High-grade *<br>The interviews conducted after:<br>1. Surgical diagnosis<br>2. Oncological treatment<br>3,4. Oncological treatment and scan showing treatment effect<br>5. After treatment | The University Hospital in Copenhagen. | N = 33<br>M: 10 and F: 23<br>23 spouses<br>2 girl/boyfriends<br>7 children<br>1 sister | Longitudinal and exploratory. | Semistructured interview/thematic analysis.          |
| Russell et al. (2016) <sup>10</sup> . Canada.     | The experience of children with a brain tumor and their caregivers.                                    | Malignant *<br>Diagnosed at least 3 months previously, stage of treatment not described.                                                                                                   | Hospital in Toronto.                   | N = 12<br>Based on names:<br>F: 11 stk., 1 stk. unknown<br>All parents                 | Grounded theory.              | Semistructured interview/comparative analysis.       |
| Schmer et al. (2008) <sup>31</sup> . USA.         | Caregivers' experience concerning care tasks after chemotherapy.                                       | Malignant *<br>During first 6 months of treatment.                                                                                                                                         | The patients' treatment center.        | N = 10<br>Sex unknown<br>7 spouses<br>2 daughters<br>1 son-in-law                      | Phenomenological.             | Semistructured interview/Colaizzi's analysis method. |

|                                              |                                                                                    |                                                                                                                                         |                                     |                                                                                      |                                  |                                                               |
|----------------------------------------------|------------------------------------------------------------------------------------|-----------------------------------------------------------------------------------------------------------------------------------------|-------------------------------------|--------------------------------------------------------------------------------------|----------------------------------|---------------------------------------------------------------|
| Schubart et al. (2008). <sup>20</sup> USA.   | Caregivers' challenges and unmet needs.                                            | Different types of brain cancer *<br>6 deceased<br>2 exacerbations<br>2 unstable<br>10 stable<br>1 terminal<br>3 recurrent<br>1 unclear | NeuroOncology Center.               | N = 25<br>M: 7 and F: 18<br>18 spouses<br>4 parents<br>2 children<br>1 sibling       | Grounded theory.                 | Semistructured interview/open coding and cross-case analysis. |
| Sherwood et al. (2011). <sup>36</sup> USA.   | How caregivers adapt to their new role, and how this role changes during time.     | Malignant *<br>Interviewed 1 and 4 months after diagnosis.                                                                              | A regional hospital.                | N = 10<br>M: 2 and F: 8<br>5 spouses<br>2 parents<br>1 child<br>1 nephew<br>1 friend | Longitudinal descriptive design. | Semistructured interview/thematic content analysis.           |
| Shortman et al. (2013). United Kingdom (UK). | Mothers of children with brain tumor—their experience and their coping mechanisms. | Different types and degrees *.<br>All underwent surgery, five radiation, and four chemotherapy.<br>17–35 months since diagnosis.        | Also participated in another study. | N = 6<br>F: 6<br>All mothers.                                                        | Not described.                   | Semistructured interview/thematic content analysis.           |

1  
2  
3  
4  
5  
6  
7  
8  
9  
10  
11  
12  
13  
14  
15  
16  
17  
18  
19  
20  
21  
22  
23  
24  
25  
26  
27  
28  
29  
30  
31  
32  
33  
34  
35  
36  
37  
38  
39  
40  
41  
42  
43  
44  
45  
46

|                                               |                                                                                                                             |                                                                                                                                                                                          |                                                         |                                                                                                 |                                    |                                                                                                |
|-----------------------------------------------|-----------------------------------------------------------------------------------------------------------------------------|------------------------------------------------------------------------------------------------------------------------------------------------------------------------------------------|---------------------------------------------------------|-------------------------------------------------------------------------------------------------|------------------------------------|------------------------------------------------------------------------------------------------|
| Strang & Strang (2001). <sup>28</sup> Sweden. | The degree to which patients with a brain tumor and their caregivers cope, understand, and create meaning in the situation. | Malignant tumors, grade 2–4.<br><br>Treatment stage not described.                                                                                                                       | Not described.                                          | N = 16<br><br>Further participant information not described.                                    | Hermeneutic phenomenological.      | Semistructured interview/structural analysis based on hermeneutic circle described by Ricoeur. |
| Tastan et al. (2011). <sup>32</sup> Turkey.   | Caregivers' experience of postoperative phase and homecare.                                                                 | Different types and degrees *<br><br>All patients had undergone surgery and postoperative treatment and were being treated at home.                                                      | A research and military training hospital in Turkey.    | N = 19<br><br>M: 4 and F: 6<br><br>4 spouses<br><br>4 children<br><br>1 parent<br><br>1 sibling | Descriptive qualitative study.     | Semistructured interview/Colaizzi's analysis method.                                           |
| Huang et al. (2021). <sup>27</sup> Taiwan     | The lived experience of parents having a child with a brain tumor during the shared decision-making process of treatment    | 4 medulloblastoma<br>3 germ cell tumor<br>1 glioblastoma<br>1 astrocytoma<br>1 ependymoma<br><br>The interviews were conducted between 1-6 months after the child received the diagnosis | A pediatric oncology ward at a medical center in Taiwan | N=10<br><br>M: 3 and F: 7                                                                       | Descriptive phenomenological study | Semistructured interview/Colaizzi's analysis method.                                           |
| Wideheim et al. (2002). <sup>26</sup> Sweden. | The experience of a brain tumor from a family perspective.                                                                  | High-grade glioma.<br><br>The interviews were conducted 2–3 weeks, 3 months, and 6 months postoperatively.                                                                               | Not described.                                          | N = 5<br><br>Sex unknown<br><br>2 spouses<br><br>2 parents                                      | Descriptive qualitative study.     | Qualitative interviews/inductive content analysis.                                             |

|                                             |                                                                                |                                       |                                                     |                                         |             |                                                     |
|---------------------------------------------|--------------------------------------------------------------------------------|---------------------------------------|-----------------------------------------------------|-----------------------------------------|-------------|-----------------------------------------------------|
|                                             |                                                                                |                                       |                                                     | 1 adult child                           |             |                                                     |
| Zelcer et al. (2010). <sup>33</sup> Canada. | The experience of brain tumor patients and caregivers in the palliative phase. | Malignant *<br>All patients deceased. | Children's Hospital, London Health Sciences Centre. | N = 25<br>M: 9 and F: 16<br>All parents | Qualitative | Semistructured interview/thematic content analysis. |

1 M = Male, F = Female

\*=Tumor not further described

PRISMA NMA Checklist of Items to Include When Reporting A Systematic Review Involving a Network Meta-analysis

| Section/Topic             | Item # | Checklist Item                                                                                                                                                                                                                                                                                                                                                                                                                                                                                                                                                                                                                                                                                                                                                                          | Reported on Page # |
|---------------------------|--------|-----------------------------------------------------------------------------------------------------------------------------------------------------------------------------------------------------------------------------------------------------------------------------------------------------------------------------------------------------------------------------------------------------------------------------------------------------------------------------------------------------------------------------------------------------------------------------------------------------------------------------------------------------------------------------------------------------------------------------------------------------------------------------------------|--------------------|
| <b>TITLE</b>              |        |                                                                                                                                                                                                                                                                                                                                                                                                                                                                                                                                                                                                                                                                                                                                                                                         |                    |
| Title                     | 1      | Identify the report as a systematic review <i>incorporating a network meta-analysis (or related form of meta-analysis)</i> .                                                                                                                                                                                                                                                                                                                                                                                                                                                                                                                                                                                                                                                            | 1                  |
| <b>ABSTRACT</b>           |        |                                                                                                                                                                                                                                                                                                                                                                                                                                                                                                                                                                                                                                                                                                                                                                                         |                    |
| Structured summary        | 2      | Provide a structured summary including, as applicable:<br><b>Background:</b> main objectives<br><b>Methods:</b> data sources; study eligibility criteria, participants, and interventions; study appraisal; and <i>synthesis methods, such as network meta-analysis</i> .<br><b>Results:</b> number of studies and participants identified; summary estimates with corresponding confidence/credible intervals; <i>treatment rankings may also be discussed. Authors may choose to summarize pairwise comparisons against a chosen treatment included in their analyses for brevity.</i><br><b>Discussion/Conclusions:</b> limitations; conclusions and implications of findings.<br><b>Other:</b> primary source of funding; systematic review registration number with registry name. | 1-2                |
| <b>INTRODUCTION</b>       |        |                                                                                                                                                                                                                                                                                                                                                                                                                                                                                                                                                                                                                                                                                                                                                                                         |                    |
| Rationale                 | 3      | Describe the rationale for the review in the context of what is already known, <i>including mention of why a network meta-analysis has been conducted</i> .                                                                                                                                                                                                                                                                                                                                                                                                                                                                                                                                                                                                                             | 3-4                |
| Objectives                | 4      | Provide an explicit statement of questions being addressed, with reference to participants, interventions, comparisons, outcomes, and study design (PICOS).                                                                                                                                                                                                                                                                                                                                                                                                                                                                                                                                                                                                                             | 4                  |
| <b>METHODS</b>            |        |                                                                                                                                                                                                                                                                                                                                                                                                                                                                                                                                                                                                                                                                                                                                                                                         |                    |
| Protocol and registration | 5      | Indicate whether a review protocol exists and if and where it can be accessed (e.g., Web address); and, if available, provide registration information, including registration number.                                                                                                                                                                                                                                                                                                                                                                                                                                                                                                                                                                                                  | n.a                |
| Eligibility criteria      | 6      | Specify study characteristics (e.g., PICOS, length of follow-up) and report characteristics (e.g., years considered, language, publication status) used as criteria for eligibility, giving rationale. <i>Clearly describe eligible treatments included in the treatment network, and note whether any have been clustered or merged into the same node (with justification)</i> .                                                                                                                                                                                                                                                                                                                                                                                                      | 6                  |
| Information sources       | 7      | Describe all information sources (e.g., databases with dates of coverage, contact with study authors to identify additional studies) in the search and date last searched.                                                                                                                                                                                                                                                                                                                                                                                                                                                                                                                                                                                                              | 5-6                |
| Search                    | 8      | Present full electronic search strategy for at least one database, including any limits used, such that it could be repeated.                                                                                                                                                                                                                                                                                                                                                                                                                                                                                                                                                                                                                                                           | 5-6                |
| Study selection           | 9      | State the process for selecting studies (i.e., screening, eligibility, included in systematic review, and, if applicable,                                                                                                                                                                                                                                                                                                                                                                                                                                                                                                                                                                                                                                                               | 6-7                |



|  |                                        |                                                                                                                                                                                                                                                                                                                                                                                                                                                      |            |
|--|----------------------------------------|------------------------------------------------------------------------------------------------------------------------------------------------------------------------------------------------------------------------------------------------------------------------------------------------------------------------------------------------------------------------------------------------------------------------------------------------------|------------|
|  |                                        | included in the meta-analysis).                                                                                                                                                                                                                                                                                                                                                                                                                      |            |
|  | Data collection process                | 10 Describe method of data extraction from reports (e.g., piloted forms, independently, in duplicate) and any processes for obtaining and confirming data from investigators.                                                                                                                                                                                                                                                                        | 7-8        |
|  | Data items                             | 11 List and define all variables for which data were sought (e.g., PICOS, funding sources) and any assumptions and simplifications made.                                                                                                                                                                                                                                                                                                             | 5-6        |
|  | <b>Geometry of the network</b>         | <b>S1</b> Describe methods used to explore the geometry of the treatment network under study and potential biases related to it. This should include how the evidence base has been graphically summarized for presentation, and what characteristics were compiled and used to describe the evidence base to readers.                                                                                                                               | <b>6</b>   |
|  | Risk of bias within individual studies | 12 Describe methods used for assessing risk of bias of individual studies (including specification of whether this was done at the study or outcome level), and how this information is to be used in any data synthesis.                                                                                                                                                                                                                            | 7          |
|  | Summary measures                       | 13 State the principal summary measures (e.g., risk ratio, difference in means). <i>Also describe the use of additional summary measures assessed, such as treatment rankings and surface under the cumulative ranking curve (SUCRA) values, as well as modified approaches used to present summary findings from meta-analyses.</i>                                                                                                                 | n.a        |
|  | Planned methods of analysis            | 14 Describe the methods of handling data and combining results of studies for each network meta-analysis. This should include, but not be limited to: <ul style="list-style-type: none"> <li>• <i>Handling of multi-arm trials;</i></li> <li>• <i>Selection of variance structure;</i></li> <li>• <i>Selection of prior distributions in Bayesian analyses; and</i></li> <li>• <i>Assessment of model fit.</i></li> </ul>                            | 7-8        |
|  | <b>Assessment of Inconsistency</b>     | <b>S2</b> Describe the statistical methods used to evaluate the agreement of direct and indirect evidence in the treatment network(s) studied. Describe efforts taken to address its presence when found.                                                                                                                                                                                                                                            | n.a        |
|  | Risk of bias across studies            | 15 Specify any assessment of risk of bias that may affect the cumulative evidence (e.g., publication bias, selective reporting within studies).                                                                                                                                                                                                                                                                                                      | <b>n.a</b> |
|  | Additional analyses                    | 16 Describe methods of additional analyses if done, indicating which were pre-specified. This may include, but not be limited to, the following: <ul style="list-style-type: none"> <li>• Sensitivity or subgroup analyses;</li> <li>• Meta-regression analyses;</li> <li>• <i>Alternative formulations of the treatment network; and</i></li> <li>• <i>Use of alternative prior distributions for Bayesian analyses (if applicable).</i></li> </ul> | <b>n.a</b> |

**RESULTS†**

|                                          |           |                                                                                                                                                                                                                                                                                                                                                                                                                                                              |                         |
|------------------------------------------|-----------|--------------------------------------------------------------------------------------------------------------------------------------------------------------------------------------------------------------------------------------------------------------------------------------------------------------------------------------------------------------------------------------------------------------------------------------------------------------|-------------------------|
| Study selection                          | 17        | Give numbers of studies screened, assessed for eligibility, and included in the review, with reasons for exclusions at each stage, ideally with a flow diagram.                                                                                                                                                                                                                                                                                              | 6-7, 9-10               |
| <b>Presentation of network structure</b> | <b>S3</b> | Provide a network graph of the included studies to enable visualization of the geometry of the treatment network.                                                                                                                                                                                                                                                                                                                                            | <b>6-7 and Figure 1</b> |
| <b>Summary of network geometry</b>       | <b>S4</b> | Provide a brief overview of characteristics of the treatment network. This may include commentary on the abundance of trials and randomized patients for the different interventions and pairwise comparisons in the network, gaps of evidence in the treatment network, and potential biases reflected by the network structure.                                                                                                                            | <b>n.a</b>              |
| Study characteristics                    | 18        | For each study, present characteristics for which data were extracted (e.g., study size, PICOS, follow-up period) and provide the citations.                                                                                                                                                                                                                                                                                                                 | 9                       |
| Risk of bias within studies              | 19        | Present data on risk of bias of each study and, if available, any outcome level assessment.                                                                                                                                                                                                                                                                                                                                                                  | n.a                     |
| Results of individual studies            | 20        | For all outcomes considered (benefits or harms), present, for each study: 1) simple summary data for each intervention group, and 2) effect estimates and confidence intervals. <i>Modified approaches may be needed to deal with information from larger networks.</i>                                                                                                                                                                                      | <b>n.a</b>              |
| Synthesis of results                     | 21        | Present results of each meta-analysis done, including confidence/credible intervals. <i>In larger networks, authors may focus on comparisons versus a particular comparator (e.g. placebo or standard care), with full findings presented in an appendix. League tables and forest plots may be considered to summarize pairwise comparisons.</i> If additional summary measures were explored (such as treatment rankings), these should also be presented. |                         |
| <b>Exploration for inconsistency</b>     | <b>S5</b> | Describe results from investigations of inconsistency. This may include such information as measures of model fit to compare consistency and inconsistency models, <i>P</i> values from statistical tests, or summary of inconsistency estimates from different parts of the treatment network.                                                                                                                                                              | <b>n.a</b>              |
| Risk of bias across studies              | 22        | Present results of any assessment of risk of bias across studies for the evidence base being studied.                                                                                                                                                                                                                                                                                                                                                        | n.a                     |
| Results of additional analyses           | 23        | Give results of additional analyses, if done (e.g., sensitivity or subgroup analyses, meta-regression analyses, <i>alternative network geometries studied, alternative choice of prior distributions for Bayesian analyses, and so forth</i> ).                                                                                                                                                                                                              | <b>n.a</b>              |
| <b>DISCUSSION</b>                        |           |                                                                                                                                                                                                                                                                                                                                                                                                                                                              |                         |
| Summary of evidence                      | 24        | Summarize the main findings, including the strength of evidence for each main outcome; consider their relevance to key groups (e.g., healthcare providers, users, and policy-makers).                                                                                                                                                                                                                                                                        | 17                      |
| Limitations                              | 25        | Discuss limitations at study and outcome level (e.g., risk of bias), and at review level (e.g., incomplete retrieval of identified research, reporting bias). <i>Comment on the validity of the assumptions, such as transitivity and consistency.</i> Comment                                                                                                                                                                                               | 16-17                   |

|    |                |                                                                    |                                                                    |
|----|----------------|--------------------------------------------------------------------|--------------------------------------------------------------------|
| 1  |                | <i>on any concerns regarding network geometry (e.g., avoidance</i> |                                                                    |
| 2  |                | <i>of certain comparisons).</i>                                    |                                                                    |
| 3  |                |                                                                    |                                                                    |
| 4  | Conclusions    | 26                                                                 | Provide a general interpretation of the results in the context of  |
| 5  |                |                                                                    | other evidence, and implications for future research.              |
| 6  |                |                                                                    | 17                                                                 |
| 7  | <b>FUNDING</b> |                                                                    |                                                                    |
| 8  | Funding        | 27                                                                 | Describe sources of funding for the systematic review and other    |
| 9  |                |                                                                    | support (e.g., supply of data); role of funders for the systematic |
| 10 |                |                                                                    | review. This should also include information regarding whether     |
| 11 |                |                                                                    | funding has been received from manufacturers of treatments in      |
| 12 |                |                                                                    | the network and/or whether some of the authors are content         |
| 13 |                |                                                                    | experts with professional conflicts of interest that could affect  |
| 14 |                |                                                                    | use of treatments in the network.                                  |
| 15 |                |                                                                    | <i>n.a</i>                                                         |

PICOS = population, intervention, comparators, outcomes, study design.

\* Text in italics indicates wording specific to reporting of network meta-analyses that has been added to guidance from the PRISMA statement.

† Authors may wish to plan for use of appendices to present all relevant information in full detail for items in this section.

### **Box. Terminology: Reviews With Networks of Multiple Treatments**

Different terms have been used to identify systematic reviews that incorporate a network of multiple treatment comparisons. A brief overview of common terms follows.

*Indirect treatment comparison:* Comparison of 2 interventions for which studies against a common comparator, such as placebo or a standard treatment, are available (i.e., indirect information). The direct treatment effects of each intervention against the common comparator (i.e., treatment effects from a comparison of interventions made within a study) may be used to estimate an indirect treatment comparison between the 2 interventions (**Appendix Figure 1, A**). An indirect treatment comparison (ITC) may also involve multiple links. For example, in **Appendix Figure 1, B**, treatments B and D may be compared indirectly on the basis of studies encompassing comparisons of B versus C, A versus C, and A versus D.

*Network meta-analysis or mixed treatment comparison:* These terms, which are often used interchangeably, refer to situations involving the simultaneous comparison of 3 or more interventions. Any network of treatments consisting of strictly unclosed loops can be thought of as a series of ITCs (**Appendix Figure 1, A and B**). In mixed treatment comparisons, both direct and indirect information is available to inform the effect size estimates for at least some of the comparisons; visually, this is shown by closed loops in a network graph (**Appendix Figure 1, C**). Closed loops are not required to be present for every comparison under study. "Network meta-analysis" is an inclusive term that incorporates the scenarios of both indirect and mixed treatment comparisons.

*Network geometry evaluation:* The description of characteristics of the network of interventions, which may include use of numerical summary statistics. This does not involve quantitative synthesis to compare treatments. This evaluation describes the current evidence available for the competing interventions to identify gaps and potential bias. Network geometry is described further in **Appendix Box 4**.

### **Appendix Box 1. The Assumption of Transitivity for Network Meta-Analysis**

Methods for indirect treatment comparisons and network meta-analysis enable learning about the relative treatment effects of, for example, treatments A and B through use of studies where these interventions are compared against a common therapy, C.

When planning a network meta-analysis, it is important to assess patient and study characteristics across the studies that compare pairs of treatments. These characteristics are commonly referred to as *effect modifiers* and include traits such as average patient age, gender distribution, disease severity, and a wide range of other plausible features.

For network meta-analysis to produce valid results, it is important that the distribution of effect modifiers is similar, for example, across studies of A versus B and A versus C. This balance increases the plausibility of reliable findings from an indirect comparison of B versus C through the common comparator A. When this balance is present, the assumption of transitivity can be judged to hold.

Authors of network meta-analyses should present systematic (and even tabulated) information regarding patient and study characteristics whenever available. This information helps readers to empirically evaluate the validity of the assumption of transitivity by reviewing the distribution of potential effect modifiers across trials.

review only

## **Appendix Box 2. Differences in Approach to Fitting Network Meta-Analyses**

Network meta-analysis can be performed within either a frequentist or a Bayesian framework. Frequentist and Bayesian approaches to statistics differ in their definitions of probability. Thus far, the majority of published network meta-analyses have used a Bayesian approach.

Bayesian analyses return the posterior probability distribution of all the model parameters given the data and prior beliefs (e.g., from external information) about the values of the parameters. They fully encapsulate the uncertainty in the parameter of interest and thus can make direct probability statements about these parameters (e.g., the probability that one intervention is superior to another).

Frequentist analyses calculate the probability that the observed data would have occurred under their sampling distribution for hypothesized values of the parameters. This approach to parameter estimation is more indirect than the Bayesian approach.

Bayesian methods have been criticized for their perceived complexity and the potential for subjectivity to be introduced by choice of a prior distribution that may affect study findings. Others argue that explicit use of a prior distribution makes transparent how individuals can interpret the same data differently. Despite these challenges, Bayesian methods offer considerable flexibility for statistical modeling. In-depth introductions to Bayesian methods and discussion of these and other issues can be found elsewhere.

Review only

### **Appendix Box 3. Network Meta-Analysis and Assessment of Consistency**

Network meta-analysis often involves the combination of direct and indirect evidence. In the simplest case, we wish to compare treatments A and B and have 2 sources of information: direct evidence via studies comparing A versus B, and indirect evidence via groups of studies comparing A and B with a common intervention, C. Together, this evidence forms a closed loop, ABC.

Direct and indirect evidence for a comparison of interventions should be combined only when their findings are similar in magnitude and interpretation. For example, for a comparison of mortality rates between A and B, an odds ratio determined from studies of A versus B should be similar to the odds ratio comparing A versus B estimated indirectly based on studies of A versus C and B versus C. This assumption of comparability of direct and indirect evidence is referred to as *consistency* of treatment effects.

When a treatment network contains a closed loop of interventions, it is possible to examine statistically whether there is agreement between the direct and indirect estimates of intervention effect.

Different methods to evaluate potential differences in relative treatment effects estimated by direct and indirect comparisons are grouped as *local approaches* and *global approaches*. Local approaches (e.g., the Bucher method or the node-splitting method) assess the presence of inconsistency for a particular pairwise comparison in the network, whereas global approaches (e.g., inconsistency models,  $I^2$  measure for inconsistency) consider the potential for inconsistency in the network as a whole.

Tests for inconsistency can have limited power to detect a true difference between direct and indirect evidence. When multiple loops are being tested for inconsistency, one or a few may show inconsistency simply by chance. Further discussions of consistency and related concepts are available elsewhere.

Inconsistency in a treatment network can indicate lack of transitivity (see **Appendix Box 1**).

#### **Appendix Box 4. Network Geometry and Considerations for Bias**

The term *network geometry* is used to refer to the architecture of the treatment comparisons that have been made for the condition under study. This includes what treatments are involved in the comparisons in a network, in what abundance they are present, the respective numbers of patients randomly assigned to each treatment, and whether particular treatments and comparisons may have been preferred or avoided.

Networks may take on different shapes. Poorly connected networks depend extensively on indirect comparisons. Meta-analyses of such networks may be less reliable than those from networks where most treatments have been compared against each other.

Qualitative description of network geometry should be provided and accompanied by a network graph. Quantitative metrics assessing features of network geometry, such as *diversity* (related to the number of treatments assessed and the balance of evidence among them), *co-occurrence* (related to whether comparisons between certain treatments are more or less common), and *homophily* (related to the extent of comparisons between treatments in the same class versus competing classes), can also be mentioned.

Although common, established steps for reviewing network geometry do not yet exist, however examples of in-depth evaluations have been described related to treatments for tropical diseases and basal cell carcinoma and may be of interest to readers. An example based on 75 trials of treatments for pulmonary arterial hypertension (**Appendix Figure 3**) suggests that head-to-head studies of active therapies may prove useful to further strengthen confidence in interpretation of summary estimates of treatment comparisons.



### **Appendix Box 5. Probabilities and Rankings in Network Meta-Analysis**

Systematic reviews incorporating network meta-analyses can provide information about the hierarchy of competing interventions in terms of treatment rankings.

The term *treatment ranking probabilities* refers to the probabilities estimated for each treatment in a network of achieving a particular placement in an ordering of treatment effects from best to worst. A network of 10 treatments provides a total of 100 ranking probabilities—that is, for each intervention, the chance of being ranked first, second, third, fourth, fifth, and so forth).

Several techniques are feasible to summarize relative rankings, and include graphical tools as well as different approaches for estimating ranking probabilities. **Appendix Figure 6** shows 2 approaches to presenting such information, on the basis of a comparison of adjuvant interventions for resected pancreatic adenocarcinoma.

Robust reporting of rankings also includes specifying median ranks with uncertainty intervals, cumulative probability curves, and the surface under the cumulative ranking (SUCRA) curve.

Rankings can be reported along with corresponding estimates of pairwise comparisons between interventions. Rankings should be reported with probability estimates to minimize misinterpretation from focusing too much on the most likely rank.

Rankings may exaggerate small differences in relative effects, especially if they are based on limited information. An objective assessment of the strength of information in the network and the magnitude of absolute benefits should accompany rankings to minimize potential biases.

1  
2  
3  
4  
5  
6  
7  
8  
9  
10  
11  
12  
13  
14  
15  
16  
17  
18  
19  
20  
21  
22  
23  
24  
25  
26  
27  
28  
29  
30  
31  
32  
33  
34  
35  
36  
37  
38  
39  
40  
41  
42  
43  
44  
45  
46  
47  
48  
49  
50  
51  
52  
53  
54  
55  
56  
57  
58  
59  
60

**Appendix Figure 1A-1C**



**Appendix Figure 3**



**Appendix Figure 6**

| Ranking | Treatment and Coresponding Ranking Probabilities<br>Grade 3 or 4 Hematologic Toxicity |             |                          |                                 |
|---------|---------------------------------------------------------------------------------------|-------------|--------------------------|---------------------------------|
|         | 5-FU                                                                                  | Gemcitabine | Chemoradiation<br>+ 5-FU | Chemoradiation<br>+ gemcitabine |
| 1       | 0.42                                                                                  | 0.42        | 0.15                     | 0.01                            |
| 2       | 0.46                                                                                  | 0.36        | 0.15                     | 0.02                            |
| 3       | 0.10                                                                                  | 0.17        | 0.68                     | 0.04                            |
| 4       | 0.02                                                                                  | 0.05        | 0.02                     | 0.93                            |



# BMJ Open

## Coping in the role as next of kin of a person with a brain tumor: a qualitative metasynthesis

|                                 |                                                                                                                                                                                                                          |
|---------------------------------|--------------------------------------------------------------------------------------------------------------------------------------------------------------------------------------------------------------------------|
| Journal:                        | <i>BMJ Open</i>                                                                                                                                                                                                          |
| Manuscript ID                   | bmjopen-2021-052872.R2                                                                                                                                                                                                   |
| Article Type:                   | Original research                                                                                                                                                                                                        |
| Date Submitted by the Author:   | 11-Apr-2022                                                                                                                                                                                                              |
| Complete List of Authors:       | Lien, Anette; University of Agder, Faculty of Health and Sport Sciences<br>Rohde, Gudrun; University of Agder, Faculty of Health and Sport Sciences;<br>Sorlandet Hospital Kristiansand, Department of Clinical Research |
| <b>Primary Subject Heading</b>: | Palliative care                                                                                                                                                                                                          |
| Secondary Subject Heading:      | Health policy                                                                                                                                                                                                            |
| Keywords:                       | MEDICAL ETHICS, ONCOLOGY, Head & neck tumours < ONCOLOGY                                                                                                                                                                 |
|                                 |                                                                                                                                                                                                                          |

SCHOLARONE™  
Manuscripts



I, the Submitting Author has the right to grant and does grant on behalf of all authors of the Work (as defined in the below author licence), an exclusive licence and/or a non-exclusive licence for contributions from authors who are: i) UK Crown employees; ii) where BMJ has agreed a CC-BY licence shall apply, and/or iii) in accordance with the terms applicable for US Federal Government officers or employees acting as part of their official duties; on a worldwide, perpetual, irrevocable, royalty-free basis to BMJ Publishing Group Ltd ("BMJ") its licensees and where the relevant Journal is co-owned by BMJ to the co-owners of the Journal, to publish the Work in this journal and any other BMJ products and to exploit all rights, as set out in our [licence](#).

The Submitting Author accepts and understands that any supply made under these terms is made by BMJ to the Submitting Author unless you are acting as an employee on behalf of your employer or a postgraduate student of an affiliated institution which is paying any applicable article publishing charge ("APC") for Open Access articles. Where the Submitting Author wishes to make the Work available on an Open Access basis (and intends to pay the relevant APC), the terms of reuse of such Open Access shall be governed by a Creative Commons licence – details of these licences and which [Creative Commons](#) licence will apply to this Work are set out in our licence referred to above.

Other than as permitted in any relevant BMJ Author's Self Archiving Policies, I confirm this Work has not been accepted for publication elsewhere, is not being considered for publication elsewhere and does not duplicate material already published. I confirm all authors consent to publication of this Work and authorise the granting of this licence.

1 **Coping in the role as next of kin of a person with a brain tumor: a**  
2 **qualitative metasynthesis**

3 *Lien, Anette Windsland<sup>1</sup>*

4 [anette\\_lien@hotmail.com](mailto:anette_lien@hotmail.com)

5 Gudrun Rohde<sup>1, 2, 3</sup>

6 [gudrun.e.rohde@uia.no](mailto:gudrun.e.rohde@uia.no)

7  
8 <sup>1</sup>Faculty of Health and Sport Sciences, University of Agder, Kristiansand, Norway

9 <sup>2</sup>Department of Clinical Research, Sorlandet Hospital, Kristiansand, Norway

10 <sup>3</sup>Marie Currie Palliative Research Department, University College London, England

11  
12 **Corresponding author:**

13 Gudrun Rohde, Faculty of Health and Sport Sciences, University of Agder, Postbox 422,

14 4604 Kristiansand, Norway

15  
16 **Word Count:** 3981

17  
18 **ABSTRACT**

19 **Objective:** Being the next of kin of a person with a brain tumor is a stressful experience.

20 For many, being a next of kin involves fear, insecurity, and overwhelming responsibility.

21 The purpose of this study was to identify and synthesize qualitative original studies that

22 explore coping in the role as next of kin of a person with a brain tumor.

23 **Methods:** A qualitative metasynthesis guided by Sandelowski and Barroso's guidelines

24 was used. The databases Medline, CHINAL, and PsycINFO were searched for studies

25 from January 2000 to January 18, 2022. Inclusion criteria were qualitative original studies

1  
2  
3 26 that aimed to explore experienced coping by the next of kin of a person with brain tumor.  
4  
5 27 The next of kin had to be 18 years of age or older.  
6  
7

8 28 **Results:** Of 1 476 screened records, data from 20 studies, including 342 participants (207  
9  
10 29 female, 81 male, and 54 unclassified) were analyzed into metasummaries and a  
11  
12 30 metasynthesis. The metasynthesis revealed that the next of kin experiences of coping were  
13  
14 31 characterized by two main themes; 1) Coping factors within the next of kin and as external  
15  
16 32 support, such as their personal characteristics, finding meaning in their situation, external  
17  
18 33 support, hope and religion, and finding interlocutors. 2) Coping strategies – control and  
19  
20 34 proactivity, including regaining control, fight against, and acceptance  
21  
22  
23  
24

25 35 **Conclusion:** Next of kin of patients with brain tumor used coping factors and coping  
26  
27 36 strategies gathered within themselves and in their surroundings to handle the situation and  
28  
29 37 their role. It is important that health-care professionals suggest and facilitate these coping  
30  
31 38 factors and strategies because this could reduce stress and make the role of next of kin  
32  
33 39 more manageable.  
34  
35  
36

37 40 **Keywords:** brain tumor; coping factors; coping strategies; metasynthesis; next of kin;  
38  
39 41 review; qualitative studies  
40  
41  
42  
43

#### 43 **Strengths and limitations of the study**

- 44  
45  
46  
47
- 44 • The qualitative approach makes an important contribution to the research field by  
45 providing a deeper understanding of coping factors and strategies used by the next  
46 of kin of a person with a brain tumor.
  - 47 • Most of the included studies in this metasynthesis were high-quality studies.
- 48  
49  
50  
51  
52  
53  
54  
55  
56  
57  
58  
59  
60

- Our sample is highly multicultural with different geographical origins represented and includes different welfare and health-care systems, and different cultures and religions.
- The majority of the sample comprised women., and a more heterogeneous sample might have revealed more nuanced findings of the role of next of kin.

## INTRODUCTION

In 2020 308,102 people worldwide with cancer in the central nervous system were registered.<sup>1</sup> The diagnosis brain tumor is very confronting, with 56% of patients experiencing one or more symptoms. Hemiparesis and cognitive challenges are most frequently reported but also headache, nausea and vomiting, vision challenges, epileptic seizures, and personality changes are considered common symptoms.<sup>2-5</sup> Changes in behavior and personality are considered particularly challenging, both for the patient and for the next of kin, as this may include apathy, loss of initiative and empathy, indifference, selfishness, physical and mental aggression, impaired emotional control and social abilities, and tendencies toward childish behavior, among others.<sup>3 5 6</sup> Studies show that the disease can be more challenging and stressful for the next of kin than for the patients. The next of kin have high rates of depression, anxiety, diverse physical pain, difficulty adapting, loneliness, and high absence from work, as well as a reduced quality of life.<sup>7-11</sup> Studies also show that both patients and next of kin miss additional follow-up, support, and information from health-care providers, family, friends, and the community in their struggle to cope with everyday life.<sup>12 13</sup>



1  
2  
3 70 All these strains can lead to next of kin experiencing stress and lack of coping. Lazarus and  
4  
5 71 Folkman define coping as a cognitive and behavioral endeavor under constant change,  
6  
7 72 dealing with external and/or internal demands that a cognitive assessment indicates are  
8  
9 73 stressful or that exceed personal resources. When dealing with these demands, the next of  
10  
11 74 kin has to review available coping factors that could be able to making the situation more  
12  
13 75 manageable; personal, external and characteristics of the situation itself.<sup>14</sup> This secondly  
14  
15 76 influence which coping strategy, meaning active actions, next of kin use for further coping  
16  
17 77 in the situation.<sup>9 13 14</sup>  
18  
19  
20  
21  
22 78 There are some original qualitative studies that have explored coping in the role as next of  
23  
24 79 kin of a person with a brain tumor. To our knowledge, this research has not been  
25  
26 80 synthesized. Such information is of great importance, especially for health-care providers  
27  
28 81 working with this group of caregivers. With improved understanding, they could expect to  
29  
30 82 be better able to facilitate more manageable everyday life among the next of kin. There is  
31  
32 83 also some quantitative research directed at these aspects,<sup>8-11 15</sup> but we wanted studies that  
33  
34 84 were personal and focused on the lived experience of next of kin, hence the choice of  
35  
36 85 qualitative studies. Therefore, the purpose of this metasynthesis was to identify and  
37  
38 86 synthesize evidence from original qualitative studies regarding the experience of coping in  
39  
40 87 the role as next of kin of a person with brain tumor. The findings are discussed in the  
41  
42 88 context of Lazarus and Folkman's stress theory<sup>14</sup> and the approach to coping with stress to  
43  
44 89 interpret our findings in a theoretical context.  
45  
46  
47  
48  
49  
50  
51  
52  
53  
54  
55  
56  
57  
58  
59  
60

## 90 **METHODS**

### 91 *Design*

92 The study was a metasynthesis within the interpretative paradigm. It was inspired by a  
93 phenomenological–hermeneutic design because the aim was to identify and synthesize  
94 qualitative original studies that explored next of kin attitudes and experiences.<sup>16</sup> The  
95 metasynthesis process consisted of five steps: (1) formulating the purpose and rationale of  
96 the study; (2) searching for and retrieving relevant qualitative research studies; (3)  
97 critically appraising the included studies; (4) classifying the findings, and finally; (5)  
98 synthesizing the findings.

### 99 *Search strategy*

100 In collaboration with an experienced librarian, we conducted a systematic search within the  
101 PsycINFO, OVID, CHINAL, and Medline databases via EBSCO host up from January  
102 2000 until 18 January 2022. For search strategy see supplementary materials 1.

103 The inclusion criteria were qualitative original studies published in English, Norwegian,  
104 Swedish or Danish language that aimed to explore experienced coping by the next of kin of  
105 a person with a brain tumor, regardless of tumor type and stage, that enhanced their role as  
106 next of kin. The next of kin had to be 18 years of age or older. The exclusion criteria were  
107 studies that did not clearly identify coping, coping that included the participants’  
108 experiences in the role of bereaved and not next of kin, and studies including diagnoses  
109 other than a brain tumor.

1  
2  
3 110 ***Search outcome***  
4

5  
6 111 The search strategy generated 1 476 unique citations. Titles and abstracts were screened by  
7  
8 112 the authors using Rayyan, a systematic review management software.<sup>17</sup> A final consensus  
9  
10 113 regarding the eligible articles was obtained through a group discussion between the  
11  
12 114 authors. Seventy-two papers were read in full and evaluated against the inclusion criteria  
13  
14 115 by both authors; 20 of these were included in the metasynthesis. Figure 1 shows the  
15  
16 116 Preferred Reporting Items for Systematic Reviews and Meta-Analyses (PRISMA)  
17  
18 117 flowchart with a full overview of the screening process. The search output is presented in  
19  
20 118 the PRISMA flowchart. The authors read the full text of the eligible articles and  
21  
22 119 independently extracted data from the included studies; this process is also illustrated in  
23  
24 120 Figure 1. Consensus for data extraction was obtained as part of a group discussion between  
25  
26 121 the authors. Supplementary materials 2 lists the title, author(s), study country, year of  
27  
28 122 publication, aim, analysis, and study participants of all included studies. Most studies were  
29  
30 123 from Europe: Sweden (3), Great Britain (3), Denmark (1), Belgium (1), and Turkey (1);  
31  
32 124 seven were from Canada (3) and the USA (4), two from Australia and two from Taiwan.  
33  
34 125 The tumor type and stage varied. For details, see supplementary materials 2.  
35  
36  
37  
38  
39

40  
41 126 Figure 1 about here  
42

43  
44 127 ***Quality appraisal***  
45

46 128 The quality of the 20 papers was evaluated using the Critical Appraisal Skills Program  
47  
48 129 (CASP) for qualitative studies. The first evaluation was conducted blinded and  
49  
50 130 independently by AWL and GR, whose CASP evaluations were then compared. Using the  
51  
52 131 criteria in CASP for independent assessment, the authors mutually agreed on a final quality  
53  
54 132 evaluation. For details, see Table 1.  
55  
56  
57  
58  
59  
60

1  
2  
3 133 The included studies appraised according to CASP are listed in Table 2. All studies had  
4  
5 134 clearly stated the study aim and the qualitative methodologies were considered appropriate.  
6  
7 135 Furthermore, several of the studies had been published in highly ranked journals. The most  
8  
9 136 poorly addressed issue (criteria number 6 in the CASP list) was the influence of the  
10  
11 137 researcher on the research and vice versa.  
12  
13

14  
15 138 Table 1 about here  
16

### 17 18 139 ***Data abstraction and analyses*** 19

20  
21 140 As suggested by Sandelowski and Barroso,<sup>16</sup> two approaches to qualitative synthesis were  
22  
23 141 used. The first of these involved qualitative metasummaries of qualitative findings from  
24  
25 142 the original studies. This method is defined as qualitative, but the findings are presented  
26  
27 143 quantitatively. The second involved a metasynthesis that developed new interpretations of  
28  
29 144 the target findings from the original studies.<sup>16</sup> The narrative analysis was inspired by  
30  
31 145 Lindseth and Nordberg's phenomenological–hermeneutic methods.<sup>18</sup> Three steps were  
32  
33 146 followed. First, the empirical materials were read several times. Second, after extraction,  
34  
35 147 the target findings were imported into NVivo 11 data management software for further  
36  
37 148 analysis.<sup>19</sup> The text was read line-by-line to identify meaning units, subthemes, and  
38  
39 149 themes. Third, the researchers aimed to achieve a comprehensive understanding of the  
40  
41 150 empirical materials, meaning units, and themes, and to relate these to the aim and research  
42  
43 151 question of the metasynthesis.<sup>18</sup> The analytic themes were identified by AWL and  
44  
45 152 discussed with GR. The process of deriving the themes was inductive. The contribution of  
46  
47 153 targeted findings from each of the included papers is outlined, and quotations are used to  
48  
49 154 illustrate and support the findings, which increases the trustworthiness of the study. To  
50  
51 155 validate the findings, both authors participated in discussions of the empirical analysis and  
52  
53 156 in writing up the findings. Ethical approval was not required for the study.  
54  
55  
56  
57  
58  
59  
60

1  
2  
3 157 Table 2 about here  
4  
5

6 158 Qualitative metasynthesis enables researchers to identify specific research questions,  
7  
8 159 search for, apprise, summarize and combine qualitative evidence to address the research  
9  
10 160 question. Metasynthesis provides novel interpretations of the target findings from original  
11  
12 161 studies. <sup>16</sup> In our methasynthesis we identified two main themes: 1) coping factors within  
13  
14 162 the next of kin and as external support and 2) coping strategies – tcontrol and proactivity,  
15  
16 163 each comprising 3-5 sub themes. For a list of the studies that generated findings for the  
17  
18 164 main themes and subthemes, see Table 2. When analyzing and organizing the results into  
19  
20 165 themes and subthemes we chose to be in line with the content and meaning of coping in the  
21  
22 166 original included studies, although some of the results could have been considered to also  
23  
24 167 contributed and organized differently. The results will be elaborated below.  
25  
26  
27  
28  
29

30 168 **PATIENT AND PUBLIC INVOLVEMENT**  
31  
32  
33

34 169 Patient or patient organization were not involved in the planning of the study, the analyses  
35  
36 170 and writing of this metasynthesis which are based on published original studies and of  
37  
38 171 whom, some included patient involvement.  
39  
40  
41  
42  
43  
44  
45  
46  
47  
48  
49  
50  
51  
52  
53  
54  
55  
56  
57  
58  
59  
60

## 172 RESULTS

173 The results are presented as metasummaries supported by tables and figures, and as a  
174 metasynthesis containing two main themes. The themes are supported by illustrative  
175 quotes from the original studies included.

### 176 *Metasummaries*

177 The 20 included studies consisted of 342 participants (207 women, 81 men, and 54 not  
178 classified). The focus was on the following themes: the needs of the next of kin;<sup>2 20-24</sup> their  
179 overall experiences as next of kin;<sup>10 25-27</sup> coping and coping strategies;<sup>28-30</sup> postoperative  
180 caregiving;<sup>31 32</sup> being a next of kin in the palliative phase;<sup>33 34</sup> support factors  
181 experienced;<sup>35</sup> how the caregiving changed over time;<sup>36</sup> and factors influencing treatment  
182 choice in the palliative phase.<sup>37</sup> Three of the studies were undertaken six months after  
183 diagnosis,<sup>27 30 31 36</sup> and three in the patients' palliative phase or postmortem.<sup>33 34 37</sup> In six  
184 studies, all the patients were children of the informants.<sup>10 29 30 33 34</sup>

### 185 *Metasynthesis*

#### 186 *Main theme 1: Coping factors within the next of kin and as external support*

187 Nineteen of the included studies provided data for the first main theme; *Coping factors*  
188 *within the next of kin and as external support* (see table 2). This main theme comprised the  
189 five sub themes: *personal characteristics, meaningful, external support, having*  
190 *interlocutors, and hope and religion.*

191 *Personal characteristics* such as a strong and positive personality were important coping  
192 factors for next of kin in new challenging situations.<sup>25 29 37</sup> Being able to show empathy for  
193 the patient and the health professionals were important, as if not the situation otherwise

1  
2  
3 194 easily could engender feelings such as discouragement and reproach.<sup>25</sup> A positive mood  
4  
5 195 and humor were also emphasized as for the same reasons.<sup>29</sup>  
6  
7

8 196 The role as next of kin was considered to be *meaningful* and important, as it made them  
9  
10 197 feel needed and productive in the situation.<sup>23 25 28 31</sup> Engagement and commitment in the  
11  
12 198 care of their relatives were highlighted by many next of kin, especially when the patients  
13  
14 199 appreciated the help.<sup>23</sup> The engagement was even stronger when the emotional bond  
15  
16 200 between patient and next of kin was strong.<sup>20 21 29 35</sup>  
17  
18  
19

20  
21 201 *“But caring for him is something I will do—it is not a burden.”*<sup>31</sup> (p. 81)  
22  
23

24 202 However, other studies revealed less engagement and commitment, and underlined anger  
25  
26 203 and reluctance with the new role as the heavy responsibility and sacrifice impacted the  
27  
28 204 next of kin's own needs and wishes.<sup>21 22 25 31 33</sup>  
29  
30

31 205 *External support* made the role of next of kin easier to cope with. The support was given  
32  
33 206 by family, friends, neighbors, colleagues and workplaces, health personnel, schools, the  
34  
35 207 religious community, people in the local community, and even strangers.<sup>2 10 20-35</sup> The  
36  
37 208 support from health-care professionals was especially important. This support included  
38  
39 209 emotional support and assistance during patient care and treatment.<sup>2 10 20-27 29-35</sup> The  
40  
41 210 importance of assistance such as medical supervision and nursing care was emphasized,<sup>10</sup>  
42  
43 211 <sup>22 29</sup> with next of kin noting that this made it possible to feel like a partner again,<sup>23</sup> while  
44  
45 212 concurrently allowing anticipated time alone.<sup>24</sup> A well-known health-care professional was  
46  
47 213 crucial in making this possible, because it implied that the patient received the best care as  
48  
49 214 they were known to the health-care professional, and also because the assistance was  
50  
51 215 considered to be less intrusive.<sup>23 24</sup> To experience the assistance with care as a coping  
52  
53 216 factor, it was crucial that care be compassionate and of the best quality. These qualities  
54  
55  
56  
57  
58  
59  
60

1  
2  
3 217 emphasized the health professional's genuine care and gave the patients and the next of kin  
4  
5 218 hope and desire to fight the disease.<sup>10 21 23 26 27 29</sup>

7  
8  
9 219 *"She (neurosurgeon) had to give us some bad news some of the time...*  
10  
11 220 *and you couldn't ask for a better manner in her delivery of that bad*  
12  
13 221 *news, or her support in what we were going through."*<sup>35</sup> (p. 8)

15  
16 222 When next of kin experienced that their loved ones received a low quality of care or  
17  
18 223 suffered malpractice, it implied mistrust of the health-care system and weakened the  
19  
20 224 experience of health-care professionals as a support factor.<sup>10 20 23 24</sup> Emotional support from  
21  
22 225 health-care professionals implied an acknowledgment that the disease affected not only the  
23  
24 226 patients, but also their next of kin. It also implied that the health-care professionals  
25  
26 227 recognized and met the wishes of the next of kin for active participation in monitoring the  
27  
28 228 patient's disease course.<sup>23 25 26 34</sup> Next of kin who did not have such involvement felt  
29  
30 229 ignored, useless, and helpless.<sup>25 29</sup>

31  
32  
33 230 Support from family and friends was invaluable in the care tasks and in coping with the  
34  
35 231 role of the next of kin.

36  
37  
38 232 *"Just support from family and friends, that was important to me, and just*  
39  
40 233 *knowing that I could call on them..."*<sup>22</sup> (p. 1098)

41  
42  
43 234 Social, practical, and emotional support was emphasized, and included such things as  
44  
45 235 economic help, childcare, transport, and housekeeping.<sup>10 22 24 25 29-32 34 35</sup> Some next of kin  
46  
47 236 would have appreciated even more support and help from family and friends, preferably  
48  
49 237 given on their own initiative.<sup>20 22 24 25 35 36</sup>



1  
2  
3 238 Having *interlocutors*, meaning having someone to confide in and talk to, were also  
4  
5 239 important in coping with the role as next of kin, as the situation, the responsibility and the  
6  
7 240 impressions were though. Supportive conversations with health-care professionals were  
8  
9 241 highly appreciated by many next of kin. However, this required the health-care  
10  
11 242 professional's understanding and empathy for the situation of the patient as well as of their  
12  
13 243 next of kin, and preferably that they should be available at all times.<sup>21 23 26 30 31 37</sup>  
14  
15  
16 244 Discussions with family and friends were also important,<sup>21 24 25 27</sup> and could even produce a  
17  
18 245 stronger bond.<sup>25</sup> Such a bond required families and friends to understand and recognize the  
19  
20 246 challenges faced by the next of kin.<sup>24</sup> Support groups and conversations with other next of  
21  
22 247 kin were also highlighted,<sup>2 22 24 30 34 35 37</sup> as it could broaden the next of kins understanding  
23  
24 248 of the tumor and what might to expect in the future.<sup>27</sup> These conversations could be face-  
25  
26 249 to-face or via the Internet.<sup>2 22 24 30 34 35 37</sup>

30  
31 250 *"From time to time, I need to be able to talk to someone. Because when I*  
32  
33 251 *lay down in the evening, then it starts to work in the inside."*<sup>23</sup> (p. 411)

34  
35  
36  
37 252 On the other hand, support groups were also considered demanding because it was difficult  
38  
39 253 to listen to other families' stories. Furthermore, for some it was considered a waste of time  
40  
41 254 to spend valuable hours with people other than their closest family members.<sup>10 22 31</sup>

42  
43  
44 255 *Hope and religion* were emphasized as important coping factors. The next of kin hoped  
45  
46 256 that a miraculous treatment would be developed so that their loved ones could survive the  
47  
48 257 disease or just have a better quality of life.<sup>2 10 20-23 26 33 34</sup>

49  
50  
51  
52 258 *You see a positive evolution, and everything that goes better is good for*  
53  
54 259 *her. (...) Nobody can forbid us to have hope. And miracles happen.*

1  
2  
3 260 *Whether we believe it or not, that's not the point, it is the only thing to*  
4  
5 261 *focus on.*"<sup>23</sup> (p. 409)  
6  
7

8  
9 262 Hope gave a reason to fight, although it weakened in the palliative phase.<sup>21 26 34</sup> Faith  
10  
11 263 strengthened the hope of healing during the treatment period and gave some form of peace  
12  
13 264 in the final palliative phase. In most cases, hope was related to faith.<sup>25-27 30 34 37</sup>  
14  
15

16  
17 265 *Main theme 2: Coping strategies – control and proactivity*  
18

19  
20 266 Eighteen of the included studies provided data for the second main theme; *Coping*  
21  
22 267 *strategies – control and proactivity* (see table 2). This main theme comprised the three sub  
23  
24 268 themes: *regain control, fight against, and acceptance*.

25  
26  
27  
28 269 *Regaining control* of the situation was a frequent coping strategy, and for most this  
29  
30 270 included gathering enough information to allow an overview of what to expect, which  
31  
32 271 implied some form of security.<sup>10 20-23 27 30 35 37</sup>  
33  
34

35  
36 272 *“So it's a, it's a roller coaster of emotion but for the most part I've been,*  
37  
38 273 *'What do we need to do? Where do we need to be?' And then just read,*  
39  
40 274 *read, read whatever I can find out, whatever information because I feel*  
41  
42 275 *like whatever I know, I can ask for.*"<sup>30</sup> (p. 34)  
43  
44  
45

46 276 The information gathered and provided should preferably be adapted to the situation and  
47  
48 277 the disease trajectory, and been given by health-care professionals.<sup>20 22 23 25 27 29 37</sup> The next  
49  
50 278 of kin often hid this information from the patients to protect them and not diminish their  
51  
52 279 hope.<sup>10 26 30 31 34</sup>  
53  
54  
55  
56  
57  
58  
59  
60

1  
2  
3 280 To regain control meant not only control of the diagnosis, but also personal control and  
4  
5 281 control over their own reactions. In some cases, the next of kin denied their feelings. Some  
6  
7 282 even denied the entire diagnosis,<sup>20 25 29 30</sup> and instead focused on being strong for the  
8  
9  
10 283 patient and the entire family.<sup>23 25 30 32-34 36</sup> One next of kin in Edvardsson and Ahlstroms'  
11  
12 284 (2008) study<sup>25</sup> reported:

15 285 *"I've sort of stowed it all away, I suppose. It is as if I'd experienced it from the*  
16  
17 286 *outside or seen it on TV. It's often that way with sorrowful things."* (p. 588)

19  
20 287 *Being proactive, facilitate and encouraging the patient to fight the disease were also*  
21  
22 288 *important coping strategies, as it felt better than accepting the morbid situation and not do*  
23  
24 289 *anything.*<sup>10 21 25 26 34</sup>

26  
27  
28 290 *"People ask you how you cope. But what if you were to give up? You've*  
29  
30 291 *got to cope—and we do have each other! (...)."*<sup>25</sup> (p. 588)

31  
32  
33 292 This implied adopting a healthier lifestyle, including changing diet and exercise habits,  
34  
35 293 hoping that this would improve the effects of medical treatment,<sup>21 26</sup> or trying alternative  
36  
37 294 treatments.<sup>10 34</sup> However, an increasing feeling of powerlessness was emphasized if the  
38  
39 295 fight, in the form of these actions and treatments, did not meet the hope of a cure.<sup>21 23 26 34</sup>

40  
41  
42 296 As the disease progressed and life went on, most next of kin accepted the diagnosis,  
43  
44 297 prognosis, and a new pattern to everyday life.<sup>10 26 28 30 34</sup> There was a striving for normality,  
45  
46 298 starting with recommencing hobbies, work, and school for children.<sup>10 26 28 30 31 33 34 36</sup> This  
47  
48 299 was particularly important within families with children. At the same time, accepting  
49  
50 300 disease progression or a bad diagnosis was most challenging when the patient was a  
51  
52 301 child.<sup>34</sup>

## 302 **DISCUSSION**

303 This metasynthesis aimed to explore coping in the role as next of kin of a person with a  
304 brain tumor. This generated two main themes; 1) coping factors within the next of kin and  
305 as external support, 2) and coping strategies – control and proactivity. Valuable coping  
306 factors included personal characteristics, finding meaning in the situation, external support,  
307 hope and religion, and interlocutors. Active strategies to manage the situation involved  
308 regaining control, being proactive, and acceptance.<sup>14 38</sup>

309 Being the next of kin to a person with a brain tumor is considered to be a negative stressor  
310 because of the challenging life situation and care tasks. Nevertheless, several next of kin  
311 included in the metasynthesis expressed a desire to fight the disease and to gain control  
312 over the situation. This is described by Lazarus and Folkman<sup>14</sup> as a secondary assessment  
313 of the situation, in which the next of kin decide which measures to implement. One such  
314 measure could be to gain personal control—one of the most important and stress-reducing  
315 personal strategies available.<sup>14</sup>

316 A possible explanation for the proactive attitude of next of kin toward the disease may be  
317 their obligation and commitment to the patient. Commitment is an expression of something  
318 of great importance and can cause one to be willing to meet threats and challenges that he  
319 or she would otherwise avoid.<sup>14</sup> However, our findings revealed that the experience of  
320 contributing to something meaningful, not the obligation to do so, promoted coping in the  
321 situation. We consider that this is caused by the fact that obligation does not automatically  
322 make an action meaningful, but rather that it can be experienced as a compulsion. This  
323 assumption is strengthened by the findings that the tasks as next of kin could arouse  
324 emotions such as anger and aversion to the patient and to the diagnosis, rather than coping.

1  
2  
3 325 Several studies refer to the same ambivalent experience regarding commitment and  
4  
5 326 attitudes toward being a next of kin.<sup>39 40</sup>  
6  
7  
8 327 External support was the factor that most relatives emphasized as promoting coping. It was  
9  
10 328 described as invaluable, which was also confirmed in other studies,<sup>41 42</sup> and in Lazarus and  
11  
12 329 Folkman's transactional stress theory.<sup>14</sup> At the same time, in both this metasynthesis and in  
13  
14  
15 330 other studies, next of kin voiced a strong desire and longing for even greater external  
16  
17 331 support.<sup>41 42</sup> The findings of the metasynthesis also showed that the configuration and  
18  
19 332 arrangement of the support, especially that given by health-care providers is of great  
20  
21  
22 333 importance. An explanation for the next of kin's experience of unmet needs might be lack  
23  
24 334 of knowledge among health-care providers about how to assist in due course. This may  
25  
26 335 indicate that in some cases health-care providers should pay more attention to offer support  
27  
28 336 in line with individual needs of the next of kin and for the care situations.  
29  
30  
31 337 The findings of this metasynthesis show that several next of kin considered hope to be an  
32  
33 338 important coping factor, especially during the disease trajectory. Hope has also been  
34  
35 339 shown to be an extensional coping factor in several studies,<sup>43 44</sup> and transactional stress  
36  
37 340 theory states that faith and hope are two of the most important personal factors in the  
38  
39 341 cognitive assessment of stressors.<sup>14 38</sup> Furthermore, according to Lazarus and Folkman,<sup>14</sup>  
40  
41 342 the two factors are strongly related, which is consistent with the findings of our  
42  
43 343 metasynthesis. For several next of kin, hope was strongly grounded in religion. This was  
44  
45 344 especially prominent in the studies conducted in the palliative phase, which indicated that  
46  
47 345 faith is strengthened when there is no hope of curative treatment. The same pattern has also  
48  
49 346 been reported in other studies describing cancer patients' experiences of palliative care.<sup>45 46</sup>  
50  
51  
52  
53  
54  
55 347

1  
2  
3 348 As the disease progressed, several next of kin accepted the diagnosis and its burden. Their  
4  
5 349 fight against the disease diminished to some extent, and the relatives instead tried to  
6  
7  
8 350 “normalize” everyday life as much as possible. Similar acceptance is also reported by next  
9  
10 351 of kin of other cancer patients, especially in the palliative phase.<sup>47 48</sup> Lazarus and Folkman  
11  
12 352 describe this as a reassessment, referring to a changed cognitive assessment of the stressor  
13  
14 353 based on new information from the environment and/or the person.<sup>14</sup>  
15  
16  
17

### 18 354 **Strengths and limitations**

19  
20  
21 355 A strength of this metasynthesis is that the primary search in the databases was conducted  
22  
23 356 with the assistance of an experienced librarian, in an attempt to ensure that as many as  
24  
25 357 possible of the relevant studies were included.<sup>49</sup> Furthermore, most of the included studies  
26  
27 358 were of high methodological quality (see Table 2). Our sample was also highly  
28  
29 359 multicultural (see Table 1). This attribute strengthens the validity of the metasynthesis  
30  
31 360 since geographical origin could have affected the study sample because of different  
32  
33 361 participant backgrounds related to different welfare and health-care systems, cultures,  
34  
35 362 and/or religions.  
36  
37  
38  
39

40 363 A limitation of our metasynthesis is that one of the 72 articles intended to be read in full  
41  
42 364 text could not be obtained.<sup>50</sup> The formation of the subthemes is also a possible limitation.  
43  
44 365 Some of the subthemes, or parts of their content, could have been categorized in the other  
45  
46 366 main theme. Both main themes and subthemes overlap in several cases, and we have read  
47  
48 367 similar studies<sup>26 30</sup> where the findings are categorized differently than in our metasynthesis.  
49  
50 368 We chose to be true to the informants’ statements, the organization and meaning of the  
51  
52 369 original studies included, and designated the location based on the informants’ way of  
53  
54 370 speaking and description of the experience. Another possible limitation is that our sample  
55  
56  
57  
58  
59  
60

1  
2  
3 371 consisted mainly of women (see supplementary materials 2). A more heterogeneous  
4  
5 372 sample might have revealed more nuanced findings and different experiences of the role of  
6  
7  
8 373 the next of kin.  
9

## 10 11 374 **CONCLUSION** 12 13

14 375 The findings of this metasynthesis show that next of kin experience and use a range of  
15  
16 376 coping factors and strategies in their role. Their experience is marked by individual  
17  
18 377 differences. It is of great importance that health-care providers offer assistance that is  
19  
20 378 individually adapted for these coping factors and strategies because this can reduce stress  
21  
22 379 among the next of kin. The coping experience seems to go through phases, and further  
23  
24 380 information is needed to understand fully how and when the various factors and strategies  
25  
26 381 are used as the disease progresses. Longitudinal studies would therefore be of particular  
27  
28 382 interest in this field.  
29  
30  
31  
32

33 383

## 34 35 36 37 384 **Supplementary information** 38

39  
40 385 The manuscript has been edited by OnLine English (<https://www.oleng.com.au>) to comply  
41  
42 386 with international publishing guidelines.  
43  
44

## 45 46 387 **Acknowledgments** 47

48  
49 388 Librarian Ellen Sejersted at the University of Agder assisted in the development of the  
50  
51 389 search strategy.  
52  
53  
54  
55  
56  
57  
58  
59  
60

1  
2  
3 390 **Authors' contributions**  
4  
5

6 391 AWL and GR designed the research project and developed the research plan. Librarian  
7  
8 392 Ellen Sejersted at the University of Agder and AWL were responsible for the literature  
9  
10 393 search, while AWL and GR were responsible for the analysis. Both authors were involved  
11  
12 394 in the screening and inclusion of the studies, reviewed the manuscript, and contributed to  
13  
14 395 the revision of the paper. Both authors read and approved the final version of the paper.  
15  
16  
17

18  
19 396 **Funding**  
20  
21

22 397 This research did not receive grants from any funding agency in the public, commercial, or  
23  
24 398 not-for-profit sectors.  
25  
26

27  
28 399 **Competing interests**  
29  
30

31 400 The authors declare that they have no competing interests.  
32  
33

34 401 **Patient consent for publication**  
35  
36

37 402 Not required  
38  
39

40 403 **Ethics approval**  
41  
42

43 404 Ethical approval was not required, as no primary data were collected as part of this study.  
44  
45

46 405 **Data availability**  
47  
48

49 406 Data are available on reasonable request.  
50  
51

52 407 **References**  
53  
54

55 408  
56  
57  
58  
59  
60



- 1  
2  
3 409 1. World Cancer Research Fund. Worldwide cancer data 2018 [Available from:  
4 410 <https://www.wcrf.org/dietandcancer/cancer-trends/worldwide-cancer-data>.  
5 411
- 6 412 2. Arber A, Faithfull S, Plaskota M, et al. A study of patients with a primary malignant  
7 413 brain tumour and their carers: symptoms and access to services. *Int J Palliat Nurs*  
8 414 2010;16(1):24-30. doi: 10.12968/ijpn.2010.16.1.46180 [published Online First:  
9 415 2010/01/22]
- 10 416 3. Voß H, Scholz-Kreisel P, Richter C, et al. Development of screening questions for  
11 417 doctor-patient consultation assessing the quality of life and psychosocial burden of  
12 418 glioma patients: an explorative study. *Qual Life Res* 2021;30(5):1513-22. doi:  
13 419 10.1007/s11136-021-02756-x [published Online First: 2021/02/01]
- 14 420 4. Armstrong TS, Dirven L, Arons D, et al. Glioma patient-reported outcome assessment in  
15 421 clinical care and research: a Response Assessment in Neuro-Oncology  
16 422 collaborative report. *Lancet Oncol* 2020;21(2):e97-e103. doi: 10.1016/s1470-  
17 423 2045(19)30796-x [published Online First: 2020/02/03]
- 18 424 5. Noll K, King AL, Dirven L, et al. Neurocognition and Health-Related Quality of Life  
19 425 Among Patients with Brain Tumors. *Hematol Oncol Clin North Am*  
20 426 2022;36(1):269-82. doi: 10.1016/j.hoc.2021.08.011 [published Online First:  
21 427 2021/10/30]
- 22 428 6. Helvoirt Rv, Holt, M. H., Bjerva, J., Langfeldt, B., Throndsen, A., & Drangsholt, L. K. .  
23 429 Dagpost-basert multidisiplinær tilbud for pasienter med høygradig gliom: første  
24 430 erfaringer ved Senter for kreftbehandling (SFK), Kristiansand. *ONKONYTT* 2016
- 25 431 7. Applebaum AJ, Kryza-Lacombe M, Buthorn J, et al. Existential distress among  
26 432 caregivers of patients with brain tumors: a review of the literature. *Neurooncol*  
27 433 *Pract* 2016;3(4):232-44. doi: 10.1093/nop/npv060 [published Online First:  
28 434 2016/12/01]
- 29 435 8. Geng HM, Chuang DM, Yang F, et al. Prevalence and determinants of depression in  
30 436 caregivers of cancer patients: A systematic review and meta-analysis. *Medicine*  
31 437 (*Baltimore*) 2018;97(39):e11863. doi: 10.1097/md.00000000000011863 [published  
32 438 Online First: 2018/10/04]
- 33 439 9. Cavers D, Hacking B, Erridge SE, et al. Social, psychological and existential well-being  
34 440 in patients with glioma and their caregivers: a qualitative study. *Cmaj*  
35 441 2012;184(7):E373-82. doi: 10.1503/cmaj.111622 [published Online First:  
36 442 2012/03/21]
- 37 443 10. Russell B, Collins A, Dowling A, et al. Predicting distress among people who care for  
38 444 patients living longer with high-grade malignant glioma. *Support Care Cancer*  
39 445 2016;24(1):43-51. doi: 10.1007/s00520-015-2739-0 [published Online First:  
40 446 2015/04/26]
- 41 447 11. Wasner M, Paal P, Borasio GD. Psychosocial care for the caregivers of primary  
42 448 malignant brain tumor patients. *J Soc Work End Life Palliat Care* 2013;9(1):74-95.  
43 449 doi: 10.1080/15524256.2012.758605 [published Online First: 2013/02/27]
- 44 450 12. Applebaum AJ, Buda K, Kryza-Lacombe M, et al. Prognostic awareness and  
45 451 communication preferences among caregivers of patients with malignant glioma.  
46 452 *Psychooncology* 2018;27(3):817-23. doi: 10.1002/pon.4581 [published Online  
47 453 First: 2017/11/11]
- 48 454 13. Cavers D, Hacking B, Erridge SC, et al. Adjustment and support needs of glioma  
49 455 patients and their relatives: serial interviews. *Psychooncology* 2013;22(6):1299-  
50 456 305. doi: 10.1002/pon.3136 [published Online First: 2012/08/01]
- 51 457 14. Lazarus RS, Folkman S. Stress, appraisal, and coping. New York: Springer 1984.  
52  
53  
54  
55  
56  
57  
58  
59  
60

- 1  
2  
3 457 15. Crooms RC, Goldstein NE, Diamond EL, et al. Palliative Care in High-Grade Glioma:  
4 458 A Review. *Brain Sci* 2020;10(10) doi: 10.3390/brainsci10100723 [published  
5 459 Online First: 2020/10/18]  
6  
7 460 16. Sandelowski M, Barroso J. Handbook for synthesizing qualitative research. New York:  
8 461 Springer 2007.  
9 462 17. Ouzzani M, Hammady, H., Fedorowicz, Z., & Elmagarmid, A. . Systematic Reviews  
10 463 2016 [Available from: <https://rayyan.qcri.org/welcome>.  
11 464 18. Lindseth A, Norberg A. A phenomenological hermeneutical method for researching  
12 465 lived experience. *Scand J Caring Sci* 2004;18(2):145-53. doi: 10.1111/j.1471-  
13 466 6712.2004.00258.x [published Online First: 2004/05/19]  
14 467 19. QSR International. NVIVO 2020 [Available from:  
15 468 <https://www.qsrinternational.com/nvivo-qualitative-data-analysis-software/home>.  
16 469 20. Schubart JR, Kinzie MB, Farace E. Caring for the brain tumor patient: family caregiver  
17 470 burden and unmet needs. *Neuro Oncol* 2008;10(1):61-72. doi: 10.1215/15228517-  
18 471 2007-040 [published Online First: 2007/11/13]  
19 472 21. Piil K, Juhler M, Jakobsen J, et al. Daily Life Experiences of Patients With a High-  
20 473 Grade Glioma and Their Caregivers: A Longitudinal Exploration of Rehabilitation  
21 474 and Supportive Care Needs. *J Neurosci Nurs* 2015;47(5):271-84. doi:  
22 475 10.1097/jnn.000000000000158 [published Online First: 2015/09/09]  
23 476 22. Janda M, Eakin EG, Bailey L, et al. Supportive care needs of people with brain  
24 477 tumours and their carers. *Support Care Cancer* 2006;14(11):1094-103. doi:  
25 478 10.1007/s00520-006-0074-1 [published Online First: 2006/05/20]  
26 479 23. Coolbrandt A, Sterckx W, Clement P, et al. Family Caregivers of Patients With a High-  
27 480 Grade Glioma: A Qualitative Study of Their Lived Experience and Needs Related  
28 481 to Professional Care. *Cancer Nurs* 2015;38(5):406-13. doi:  
29 482 10.1097/ncc.0000000000000216 [published Online First: 2014/12/19]  
30 483 24. Arber A, Hutson N, de Vries K, et al. Finding the right kind of support: a study of  
31 484 carers of those with a primary malignant brain tumour. *Eur J Oncol Nurs*  
32 485 2013;17(1):52-8. doi: 10.1016/j.ejon.2012.01.008 [published Online First:  
33 486 2012/03/03]  
34 487 25. Edvardsson T, Ahlström G. Being the next of kin of a person with a low-grade glioma.  
35 488 *Psychooncology* 2008;17(6):584-91. doi: 10.1002/pon.1276 [published Online  
36 489 First: 2007/10/25]  
37 490 26. Wideheim AK, Edvardsson T, Pålsson A, et al. A family's perspective on living with a  
38 491 highly malignant brain tumor. *Cancer Nurs* 2002;25(3):236-44. doi:  
39 492 10.1097/00002820-200206000-00012 [published Online First: 2002/06/01]  
40 493 27. Huang TY, Mu PF, Chen YW. The Lived Experiences of Parents Having a Child With  
41 494 a Brain Tumor During the Shared Decision-Making Process of Treatment. *Cancer*  
42 495 *Nurs* 2021 doi: 10.1097/ncc.0000000000000979 [published Online First:  
43 496 2021/09/02]  
44 497 28. Strang S, Strang P. Spiritual thoughts, coping and 'sense of coherence' in brain tumour  
45 498 patients and their spouses. *Palliat Med* 2001;15(2):127-34. doi:  
46 499 10.1191/026921601670322085 [published Online First: 2001/04/17]  
47 500 29. Shortman RI, Beringer A, Penn A, et al. The experience of mothers caring for a child  
48 501 with a brain tumour. *Child Care Health Dev* 2013;39(5):743-9. doi:  
49 502 10.1111/cch.12005 [published Online First: 2012/09/14]  
50  
51  
52  
53  
54  
55  
56  
57  
58  
59  
60

- 1  
2  
3 503 30. Cutillo A, Zimmerman K, Davies S, et al. Coping strategies used by caregivers of  
4 504 children with newly diagnosed brain tumors. *J Neurosurg Pediatr* 2018;23(1):30-  
5 505 39. doi: 10.3171/2018.7.Peds18296 [published Online First: 2018/11/30]  
6 506 31. Schmer C, Ward-Smith P, Latham S, et al. When a family member has a malignant  
7 507 brain tumor: the caregiver perspective. *J Neurosci Nurs* 2008;40(2):78-84. doi:  
8 508 10.1097/01376517-200804000-00006 [published Online First: 2008/05/17]  
9 509 32. Tastan S, Kose G, Iyigun E, et al. Experiences of the relatives of patients undergoing  
10 510 cranial surgery for a brain tumor: a descriptive qualitative study. *J Neurosci Nurs*  
11 511 2011;43(2):77-84. doi: 10.1097/jnn.0b013e31820c94da [published Online First:  
12 512 2011/04/15]  
13 513 33. Zelcer S, Cataudella D, Cairney AE, et al. Palliative care of children with brain tumors:  
14 514 a parental perspective. *Arch Pediatr Adolesc Med* 2010;164(3):225-30. doi:  
15 515 10.1001/archpediatrics.2009.284 [published Online First: 2010/03/03]  
16 516 34. Lou HL, Mu PF, Wong TT, et al. A Retrospective Study of Mothers' Perspectives of  
17 517 the Lived Experience of Anticipatory Loss of a Child From a Terminal Brain  
18 518 Tumor. *Cancer Nurs* 2015;38(4):298-304. doi: 10.1097/ncc.000000000000178  
19 519 [published Online First: 2014/07/11]  
20 520 35. Ownsworth T, Goadby E, Chambers SK. Support after brain tumor means different  
21 521 things: family caregivers' experiences of support and relationship changes. *Front*  
22 522 *Oncol* 2015;5:33. doi: 10.3389/fonc.2015.00033 [published Online First:  
23 523 2015/03/03]  
24 524 36. Hricik A, Donovan H, Bradley SE, et al. Changes in caregiver perceptions over time in  
25 525 response to providing care for a loved one with a primary malignant brain tumor.  
26 526 *Oncol Nurs Forum* 2011;38(2):149-55. doi: 10.1188/11.Onf.149-155 [published  
27 527 Online First: 2011/03/02]  
28 528 37. Lipsman N, Skanda A, Kimmelman J, et al. The attitudes of brain cancer patients and  
29 529 their caregivers towards death and dying: a qualitative study. *BMC Palliat Care*  
30 530 2007;6:7. doi: 10.1186/1472-684x-6-7 [published Online First: 2007/11/13]  
31 531 38. Lazarus RS. Stress og følelser: en syntese. København: Akademisk Forlag 2006.  
32 532 39. Lin IF, Fee HR, Wu HS. NEGATIVE AND POSITIVE CAREGIVING  
33 533 EXPERIENCES: A CLOSER LOOK AT THE INTERSECTION OF GENDER  
34 534 AND RELATIOSHIPS. *Fam Relat* 2012;61(2):343-58. doi: 10.1111/j.1741-  
35 535 3729.2011.00692.x [published Online First: 2012/05/01]  
36 536 40. Daniela Doulavince A, Altamira Pereira da Silva R, Regina Aparecida Garcia de L, et  
37 537 al. Conceptions of care and feelings of the caregiver of children with  
38 538 cancer/Concepções de cuidado e sentimentos do cuidador de crianças com câncer.  
39 539 *Acta paulista de enfermagem* 2013;26(6):542.  
40 540 41. Nicklin E, Velikova G, Hulme C, et al. Long-term issues and supportive care needs of  
41 541 adolescent and young adult childhood brain tumour survivors and their caregivers:  
42 542 A systematic review. *Psychooncology* 2019;28(3):477-87. doi: 10.1002/pon.4989  
43 543 [published Online First: 2019/01/19]  
44 544 42. Sterckx W, Coolbrandt A, Dierckx de Casterlé B, et al. The impact of a high-grade  
45 545 glioma on everyday life: a systematic review from the patient's and caregiver's  
46 546 perspective. *Eur J Oncol Nurs* 2013;17(1):107-17. doi: 10.1016/j.ejon.2012.04.006  
47 547 [published Online First: 2012/06/05]  
48 548 43. Holtslander LF, Duggleby W, Williams AM, et al. The experience of hope for informal  
49 549 caregivers of palliative patients. *J Palliat Care* 2005;21(4):285-91. [published  
50 550 Online First: 2006/02/18]

- 1  
2  
3 551 44. Leite A, Garcia-Vivar C, Neris RR, et al. The experience of hope in families of  
4 552 children and adolescents living with chronic illness: A thematic synthesis of  
5 553 qualitative studies. *J Adv Nurs* 2019;75(12):3246-62. doi: 10.1111/jan.14129  
6 554 [published Online First: 2019/06/27]  
7  
8 555 45. Lina Mahayati S, Allenidekania, Happy H. Spirituality in adolescents with cancer.  
9 556 *Enferm Clin* 2018;28 Suppl 1:31-35. doi: 10.1016/s1130-8621(18)30032-9  
10 557 [published Online First: 2018/04/14]  
11 558 46. Alidina K, Tettero I. Exploring the therapeutic value of hope in palliative nursing.  
12 559 *Palliat Support Care* 2010;8(3):353-8. doi: 10.1017/s1478951510000155  
13 560 [published Online First: 2010/09/30]  
14 561 47. Wang SC, Wu LM, Yang YM, et al. The experience of parents living with a child with  
15 562 cancer at the end of life. *Eur J Cancer Care (Engl)* 2019;28(4):e13061. doi:  
16 563 10.1111/ecc.13061 [published Online First: 2019/04/25]  
17 564 48. Hisamatsu M, & Niwa, S. . Support factors of coping with anxiety in families of  
18 565 patients with terminal cancer. *Journal of Japan Academy of Nursing Science*  
19 566 2011;31(1):58-67. doi: 10.5630/jans.31.1\_58  
20 567 49. Aromataris EM, Z (Eds.). Joanna Briggs Institute Reviewer's Manual 2017 [Available  
21 568 from:  
22 569 <https://wiki.joannabriggs.org/display/MANUAL/JBI+Reviewer%27s+Manual>  
23 570 50. Salander P. Brain tumor as a threat to life and personality: The spouse's perspective.  
24 571 *Journal of Psychosocial Oncology* 1996;14(3):1-18.  
25  
26  
27  
28 572

1  
2  
3  
4  
5  
6  
7  
8  
9  
10  
11  
12  
13  
14  
15  
16  
17  
18  
19  
20  
21  
22  
23  
24  
25  
26  
27  
28  
29  
30  
31  
32  
33  
34  
35  
36  
37  
38  
39  
40  
41  
42  
43  
44  
45  
46

**Table 1: Critical appraisal of the included studies.**

| Criterion<br>Y = yes<br>N = no<br>C = can't tell<br>V = valuable<br>NV = not valuable | 1. Was there a clear statement of the aims? | 2. Is a qualitative methodology appropriate? | 3. Was the research design appropriate? | 4. Was the recruitment strategy appropriate? | 5. Were the data collected in a way that addressed the research issue? | 6. Has the relationship between researcher and participants been adequately considered? | 7. Have ethical issues been taken into consideration? | 8. Was the data analysis sufficiently rigorous? | 9. Is there a clear statement of findings? | 10. How valuable is the research? | Impact factor |
|---------------------------------------------------------------------------------------|---------------------------------------------|----------------------------------------------|-----------------------------------------|----------------------------------------------|------------------------------------------------------------------------|-----------------------------------------------------------------------------------------|-------------------------------------------------------|-------------------------------------------------|--------------------------------------------|-----------------------------------|---------------|
| Arber et al. (2010) <sup>2</sup>                                                      | Y                                           | Y                                            | C                                       | C                                            | Y                                                                      | N                                                                                       | Y                                                     | C                                               | Y                                          | V                                 | Not found     |
| Arber et al. (2013) <sup>24</sup>                                                     | Y                                           | Y                                            | Y                                       | Y                                            | Y                                                                      | N                                                                                       | Y                                                     | Y                                               | Y                                          | V                                 | 1.697         |
| Coolbrant et al. (2015) <sup>23</sup>                                                 | Y                                           | Y                                            | Y                                       | Y                                            | Y                                                                      | C                                                                                       | Y                                                     | Y                                               | Y                                          | V                                 | 2.022         |
| Cutillo et al. (2018) <sup>30</sup>                                                   | Y                                           | Y                                            | Y                                       | Y                                            | Y                                                                      | Y                                                                                       | N                                                     | Y                                               | C                                          | V                                 | 2.170         |
| Edvardsson & Ahlström (2008) <sup>25</sup>                                            | Y                                           | Y                                            | Y                                       | Y                                            | Y                                                                      | N                                                                                       | N                                                     | Y                                               | Y                                          | V                                 | 3.470         |
| Janda et al. (2006) <sup>22</sup>                                                     | Y                                           | Y                                            | Y                                       | Y                                            | Y                                                                      | N                                                                                       | Y                                                     | Y                                               | Y                                          | V                                 | 2.754         |
| Huang et al. (2021) <sup>27</sup>                                                     | Y                                           | Y                                            | Y                                       | Y                                            | Y                                                                      | N                                                                                       | Y                                                     | Y                                               | Y                                          | V                                 | 2.592         |
| Lipsman et al. (2007) <sup>37</sup>                                                   | Y                                           | Y                                            | Y                                       | Y                                            | Y                                                                      | N                                                                                       | Y                                                     | Y                                               | Y                                          | V                                 | 2.922         |
| Lou et al. (2015) <sup>34</sup>                                                       | C                                           | Y                                            | Y                                       | C                                            | Y                                                                      | N                                                                                       | N                                                     | C                                               | Y                                          | V                                 | 2.022         |
| Owensworth et al. (2015) <sup>35</sup>                                                | Y                                           | Y                                            | Y                                       | Y                                            | Y                                                                      | C                                                                                       | C                                                     | Y                                               | Y                                          | V                                 | 4.137         |
| Piil et al. (2015) <sup>21</sup>                                                      | Y                                           | Y                                            | Y                                       | Y                                            | Y                                                                      | C                                                                                       | Y                                                     | Y                                               | Y                                          | V                                 | 1.096         |
| Russel et al. (2016) <sup>10</sup>                                                    | Y                                           | Y                                            | Y                                       | Y                                            | Y                                                                      | N                                                                                       | Y                                                     | Y                                               | Y                                          | V                                 | 1.197         |
| Schmer et al. (2008) <sup>31</sup>                                                    | Y                                           | Y                                            | N                                       | Y                                            | N                                                                      | N                                                                                       | Y                                                     | N                                               | Y                                          | V                                 | 1.096         |

|                                      |   |   |   |   |   |   |   |   |   |   |       |
|--------------------------------------|---|---|---|---|---|---|---|---|---|---|-------|
| Schubart et al. (2008) <sup>20</sup> | C | Y | Y | Y | Y | N | N | Y | Y | V | 3.470 |
| Sherwood et al. (2011) <sup>36</sup> | Y | Y | Y | Y | C | Y | N | Y | N | V | 1.438 |
| Shortman et al. (2013)               | Y | Y | Y | C | C | N | Y | N | Y | V | 1.918 |
| Strang & Strang (2001) <sup>28</sup> | C | C | Y | N | Y | N | Y | Y | Y | V | 4.956 |
| Tastan et al. (2011) <sup>32</sup>   | Y | Y | N | Y | Y | N | Y | N | Y | V | 1.096 |
| Wideheim et al. (2002) <sup>26</sup> | Y | Y | Y | Y | Y | N | C | Y | Y | V | 2.022 |
| Zelcer et al. (2010) <sup>33</sup>   | Y | Y | Y | Y | Y | N | C | Y | Y | V | 5.731 |

**Table 2: Thematic overview showing the studies' contribution to the different themes and subthemes.sjekke**

| Author                                    | <i>Coping factors within the next of kin and as external support</i> |            |                  |                   |                     | <i>Coping strategies – control and proactivity</i> |               |            |
|-------------------------------------------|----------------------------------------------------------------------|------------|------------------|-------------------|---------------------|----------------------------------------------------|---------------|------------|
|                                           | Personal characteristics                                             | Meaningful | External support | Hope and religion | Having interlocutor | Regain control                                     | Fight against | Acceptance |
| Arber et al. (2010) <sup>2</sup>          |                                                                      |            | V                | V                 | V                   |                                                    |               |            |
| Arber et al. (2013) <sup>24</sup>         |                                                                      |            | V                |                   | V                   |                                                    |               |            |
| Coolbrandt et al. (2015) <sup>23</sup>    |                                                                      | V          | V                | V                 | V                   | V                                                  |               |            |
| Cutillo et al. (2018) <sup>30</sup>       |                                                                      |            | V                | V                 | V                   | V                                                  |               | V          |
| Edvardson & Ahlström (2008) <sup>25</sup> | V                                                                    | V          | V                | V                 | V                   | V                                                  | V             |            |
| Janda et al. (2006) <sup>22</sup>         |                                                                      |            | V                | V                 | V                   | V                                                  |               |            |
| Huang et al. (2021) <sup>27</sup>         |                                                                      |            | V                | V                 | V                   | V                                                  |               |            |
| Lipsman et al. (2007) <sup>37</sup>       | V                                                                    |            |                  | V                 | V                   | V                                                  |               |            |
| Lou et al. (2015) <sup>34</sup>           |                                                                      |            | V                | V                 | V                   | V                                                  | V             | V          |
| Ownsworth et al. (2015) <sup>35</sup>     |                                                                      | V          | V                |                   | V                   | V                                                  |               |            |
| Piil et al. (2015) <sup>21</sup>          |                                                                      | V          | V                | V                 | V                   | V                                                  | V             |            |
| Russell et al. (2016) <sup>10</sup>       |                                                                      |            | V                | V                 |                     | V                                                  | V             | V          |
| Schmer et al. (2008) <sup>31</sup>        |                                                                      | V          | V                |                   | V                   |                                                    |               | V          |
| Schubart et al. (2008) <sup>20</sup>      |                                                                      | V          | V                | V                 |                     | V                                                  |               |            |
| Sherwood et al. (2011) <sup>36</sup>      |                                                                      |            |                  |                   | V                   | V                                                  |               | V          |
| Shortman et al. (2013) <sup>36</sup>      | V                                                                    | V          | V                |                   |                     | V                                                  |               |            |

1  
2  
3  
4  
5  
6  
7  
8  
9  
10  
11  
12  
13  
14  
15  
16  
17  
18  
19  
20  
21  
22  
23  
24  
25  
26  
27  
28  
29  
30  
31  
32  
33  
34  
35  
36  
37  
38  
39  
40  
41  
42  
43  
44  
45  
46

|                                      |  |   |   |   |   |   |   |   |
|--------------------------------------|--|---|---|---|---|---|---|---|
| Strang & Strang (2001) <sup>28</sup> |  | V | V |   |   |   |   | V |
| Tastan et al. (2011) <sup>32</sup>   |  |   | V |   |   | V |   |   |
|                                      |  |   |   |   |   |   |   |   |
| Wideheim et al. (2002) <sup>26</sup> |  |   | V | V | V |   | V | V |
| Zelcer et al. (2010) <sup>33</sup>   |  |   | V | V |   | V |   | V |

For peer review only



1  
2  
3  
4  
5  
6  
7  
8  
9  
10  
11  
12  
13  
14  
15  
16  
17  
18  
19  
20  
21  
22  
23  
24  
25  
26  
27  
28  
29  
30  
31  
32  
33  
34  
35  
36  
37  
38  
39  
40  
41  
42  
43  
44  
45  
46  
47  
48  
49  
50  
51  
52  
53  
54  
55  
56  
57  
58  
59  
60

Figure legend: Figure 1. Flow chart of the inclusion process

For peer review only

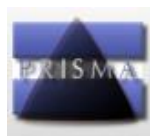

## PRISMA 2009 Flow Diagram

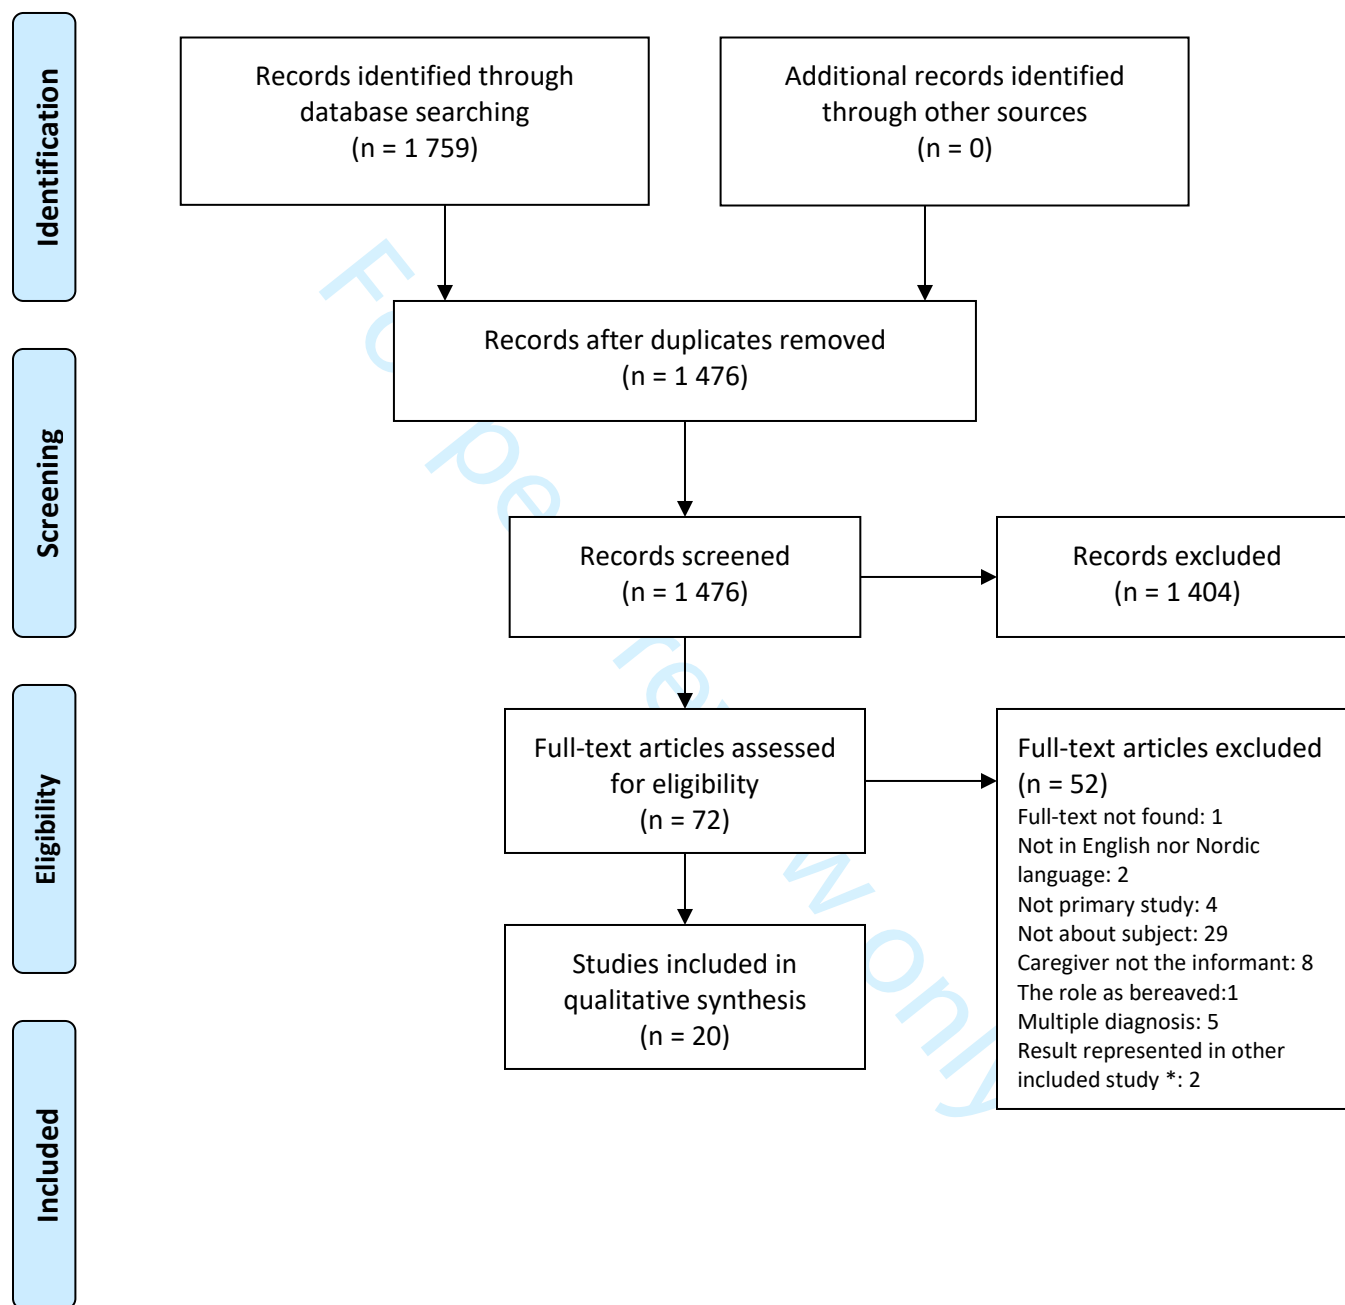

Figure 1. Flow chart of the inclusion process

From: Moher D, Liberati A, Tetzlaff J, Altman DG, The PRISMA Group (2009). Preferred Reporting Items for Systematic Reviews and Meta-Analyses: The PRISMA Statement. PLoS Med 6(7): e1000097. doi:10.1371/journal.pmed1000097

For more information, visit [www.prisma-statement.org](http://www.prisma-statement.org).

For peer review only - <http://bmjopen.bmj.com/site/about/guidelines.xhtml>

1  
2  
3 The search strategy for the metasynthesis:  
4

5 To search the PsycINFO database, we used the following terms: *((qualitative adj2 (research\**  
6 *or design\* or stud\* or method\*)) or hermeneutic\**  
7  
8 *or “grounded theory” or “meta syntheses” or metasynthesis\* or metaethnograph\* or interview\**  
9  
10 *or phenomenolog\* or thematic or themes or experience\*).ti,ab,hw,id. or exp qualitative*  
11  
12 *methods or phenomenology AND (caregiver\* or famil\* or next of kin\* or relatives or spous\**  
13  
14 *or wife or husband\* or sibling\* or sister\* or brother\* or dependent\* or loved one\* or*  
15  
16 *parent\* or mother\* or father\* or carer\* or care giver\*).ti,ab,hw,id. AND glioma\*.ti,ab,hw,id.*  
17  
18 *OR (brain adj2 (cancer or neoplasm\* or tumor\*).ti,ab,hw,id.*  
19  
20  
21  
22  
23  
24  
25

26 In Medline and CHINAL, we used the following terms: *caregiver\* OR famil\* OR “next of*  
27  
28 *kin\*” OR relatives OR spous\* OR wife OR husband\* OR sibling\* OR brother\* OR sister\**  
29  
30 *OR dependent\* OR “loved one\*” OR parent\* OR mother\* OR father\* OR carer\* OR “care*  
31  
32 *giver\*” AND (MH “Qualitative Studies+”) OR (MH “Qualitative Research+”) OR*  
33  
34 *(MH “Grounded Theory”) OR Interview\* OR experienc\* OR phenomenolog\* OR (qualitative*  
35  
36 *WI (research\* OR method\* OR design\* OR stud\*)) OR themes OR thematic OR “audio*  
37  
38 *recording” OR audiorecording OR metasyntheses\* OR “meta syntheses\*” OR metaethnograph\**  
39  
40 *AND (MH “Glioma+”) OR glioma OR gliomas OR glioblastom\* OR brain WI (cancer OR*  
41  
42 *tumor\* or neoplasm\*).*  
43  
44  
45  
46  
47  
48  
49  
50  
51  
52  
53  
54  
55  
56  
57  
58  
59  
60

**Supplementary materials 2: Characteristics of the included studies.**

| Author/year/country                                        | Focus                                                                                      | Type of brain tumor and stage of treatment at interview                                    | Recruitment                                         | Participants, sex, and relationship                               | Method/design               | Data collection/analysis                                                                         |
|------------------------------------------------------------|--------------------------------------------------------------------------------------------|--------------------------------------------------------------------------------------------|-----------------------------------------------------|-------------------------------------------------------------------|-----------------------------|--------------------------------------------------------------------------------------------------|
| Arber et al. (2010). <sup>2</sup><br>United Kingdom (UK).  | Caregivers' need for information.                                                          | Malignant *<br>Stage of treatment not described.                                           | Specialist hospital in England.                     | N = 22<br>M: 7 and F: 15<br>17 spouses<br>3 children<br>2 parents | Grounded theory.            | Semistructured interview/comparative method for generating categories and topics.                |
| Arber et al. (2013). <sup>24</sup><br>United Kingdom (UK). | Caregivers' need for support.                                                              | Malignant *<br>Stage of treatment not described.                                           | Recruited by a nurse at a cancer center in England. | N = 22<br>M: 7 and F: 15<br>17 spouses<br>3 children<br>2 parents | Grounded theory.            | Semistructured interview/comparative method for generating categories and topics.                |
| Coolbrandt et al. (2015). <sup>23</sup> Belgium.           | Caregivers' experience and need for support.                                               | High-grade *<br>Radiation or chemotherapy, or in the follow-up phase after such treatment. | University Hospital in Leuven.                      | N = 16<br>M: 6 and F: 10<br>13 partners<br>2 parents<br>1 friend  | Grounded theory.            | Semistructured interview/thematic analysis inspired by the Qualitative Analysis Guide of Leuven. |
| Cuttillo et al. (2018). <sup>30</sup><br>USA.              | Which strategies caregivers of children with a brain tumor use in the postoperative phase. | 15 benign.<br>25 malignant.<br>Newly diagnosed and newly operated.                         | Pediatric hospital in the USA.                      | N = 22<br>M: 3 and F: 19<br>All parents                           | Triangulating mixed-method. | Semistructured interview/thematic analysis.                                                      |

1  
2  
3  
4  
5  
6  
7  
8  
9  
10  
11  
12  
13  
14  
15  
16  
17  
18  
19  
20  
21  
22  
23  
24  
25  
26  
27  
28  
29  
30  
31  
32  
33  
34  
35  
36  
37  
38  
39  
40  
41  
42  
43  
44  
45  
46

|                                                     |                                                                                                          |                                                                                                                                              |                                                                  |                                                                                                                           |                   |                                                                                                                                            |
|-----------------------------------------------------|----------------------------------------------------------------------------------------------------------|----------------------------------------------------------------------------------------------------------------------------------------------|------------------------------------------------------------------|---------------------------------------------------------------------------------------------------------------------------|-------------------|--------------------------------------------------------------------------------------------------------------------------------------------|
| Edvardson & Ahlström (2008) <sup>25</sup> . Sweden. | Caregivers' experience.                                                                                  | 25 low-grade.<br>2 high-grade.<br>Stage of treatment not described.                                                                          | The patients had participated in an earlier study.               | N = 28<br>M: 8 and F: 20<br>15 partners, living together<br>3 partners, living apart<br>8 parents<br>1 sibling<br>1 child | Not described.    | Semistructured interview/qualitative content analysis and quantitative analysis of how the topics were distributed among the participants. |
| Janda et al. (2006) <sup>22</sup> . Australia.      | The need of support for brain tumor patients and their caregivers.                                       | Different types *<br>Treatment phase not described, but time since diagnosis stated:<br>1–2 years: 22<br>5 years: 5<br>More than 5 years: 11 | Members of Queensland Cancer Fund's Brain Tumor Support Service. | N = 10 in focus group, n = 8 in semistructured interview<br>M: 4 and F: 18<br>13 partners<br>5 children                   | Qualitative.      | Focus group interview and semistructured interview/framework analysis.                                                                     |
| Lipsman et al. (2007) <sup>37</sup> . Canada.       | The experience of brain tumor patients and their caregivers, and how it affects the choice of treatment. | Malignant *<br>Palliative phase.                                                                                                             | Recruited by a neurosurgeon.                                     | N = 22<br>Further participant information not described                                                                   | Qualitative.      | Semistructured interview/thematic analysis.                                                                                                |
| Lou et al. (2015) <sup>34</sup> . Taiwan.           | The experience and suffering of mothers waiting for their child to die from brain tumor.                 | Malignant *<br>All patients deceased.                                                                                                        | Not described.                                                   | N = 10<br>F: 10<br>All mothers                                                                                            | Phenomenological. | In-depth interview/Colaizzi's analysis method.                                                                                             |

|                                                                            |                                                    |                                                                                                        |                                                                                                                                                                                            |                                        |                                                                                        |                               |                                                      |
|----------------------------------------------------------------------------|----------------------------------------------------|--------------------------------------------------------------------------------------------------------|--------------------------------------------------------------------------------------------------------------------------------------------------------------------------------------------|----------------------------------------|----------------------------------------------------------------------------------------|-------------------------------|------------------------------------------------------|
| 1<br>2<br>3<br>4<br>5<br>6<br>7<br>8<br>9<br>10<br>11                      | Owensworth et al. (2015). <sup>35</sup> Australia. | Caregivers' experience of support.                                                                     | 6 low-grade.<br>5 high-grade.<br>All underwent surgery and radiation or chemotherapy.<br>9 months – 22 years since diagnosis.                                                              | Had participated in a different study. | N = 11<br>M: 6 and F: 5<br>8 spouses<br>3 parents                                      | Phenomenological.             | Semistructured interview/thematic analysis.          |
| 12<br>13<br>14<br>15<br>16<br>17<br>18<br>19<br>20<br>21<br>22<br>23<br>24 | Piil et al. (2015). <sup>21</sup> Denmark.         | Brain tumor patients' and their caregivers' experience, and their need for rehabilitation and support. | High-grade *<br>The interviews conducted after:<br>1. Surgical diagnosis<br>2. Oncological treatment<br>3,4. Oncological treatment and scan showing treatment effect<br>5. After treatment | The University Hospital in Copenhagen. | N = 33<br>M: 10 and F: 23<br>23 spouses<br>2 girl/boyfriends<br>7 children<br>1 sister | Longitudinal and exploratory. | Semistructured interview/thematic analysis.          |
| 25<br>26<br>27<br>28<br>29<br>30<br>31                                     | Russell et al. (2016) <sup>10</sup> . Canada.      | The experience of children with a brain tumor and their caregivers.                                    | Malignant *<br>Diagnosed at least 3 months previously, stage of treatment not described.                                                                                                   | Hospital in Toronto.                   | N = 12<br>Based on names:<br>F: 11 stk., 1 stk. unknown<br>All parents                 | Grounded theory.              | Semistructured interview/comparative analysis.       |
| 32<br>33<br>34<br>35<br>36<br>37<br>38<br>39<br>40                         | Schmer et al. (2008) <sup>31</sup> . USA.          | Caregivers' experience concerning care tasks after chemotherapy.                                       | Malignant *<br>During first 6 months of treatment.                                                                                                                                         | The patients' treatment center.        | N = 10<br>Sex unknown<br>7 spouses<br>2 daughters<br>1 son-in-law                      | Phenomenological.             | Semistructured interview/Colaizzi's analysis method. |

|                                                     |                                                                                           |                                                                                                                                                       |                                            |                                                                                                   |                                         |                                                                      |
|-----------------------------------------------------|-------------------------------------------------------------------------------------------|-------------------------------------------------------------------------------------------------------------------------------------------------------|--------------------------------------------|---------------------------------------------------------------------------------------------------|-----------------------------------------|----------------------------------------------------------------------|
| <p>Schubart et al. (2008).<sup>20</sup> USA.</p>    | <p>Caregivers' challenges and unmet needs.</p>                                            | <p>Different types of brain cancer *<br/>6 deceased<br/>2 exacerbations<br/>2 unstable<br/>10 stable<br/>1 terminal<br/>3 recurrent<br/>1 unclear</p> | <p>NeuroOncology Center.</p>               | <p>N = 25<br/>M: 7 and F: 18<br/>18 spouses<br/>4 parents<br/>2 children<br/>1 sibling</p>        | <p>Grounded theory.</p>                 | <p>Semistructured interview/open coding and cross-case analysis.</p> |
| <p>Sherwood et al. (2011).<sup>36</sup> USA.</p>    | <p>How caregivers adapt to their new role, and how this role changes during time.</p>     | <p>Malignant *<br/>Interviewed 1 and 4 months after diagnosis.</p>                                                                                    | <p>A regional hospital.</p>                | <p>N = 10<br/>M: 2 and F: 8<br/>5 spouses<br/>2 parents<br/>1 child<br/>1 nephew<br/>1 friend</p> | <p>Longitudinal descriptive design.</p> | <p>Semistructured interview/thematic content analysis.</p>           |
| <p>Shortman et al. (2013). United Kingdom (UK).</p> | <p>Mothers of children with brain tumor—their experience and their coping mechanisms.</p> | <p>Different types and degrees *.<br/>All underwent surgery, five radiation, and four chemotherapy.<br/>17–35 months since diagnosis.</p>             | <p>Also participated in another study.</p> | <p>N = 6<br/>F: 6<br/>All mothers.</p>                                                            | <p>Not described.</p>                   | <p>Semistructured interview/thematic content analysis.</p>           |

1  
2  
3  
4  
5  
6  
7  
8  
9  
10  
11  
12  
13  
14  
15  
16  
17  
18  
19  
20  
21  
22  
23  
24  
25  
26  
27  
28  
29  
30  
31  
32  
33  
34  
35  
36  
37  
38  
39  
40  
41  
42  
43  
44  
45  
46

|                                                                            |                                               |                                                                                                                             |                                                                                                                                                                                      |                                                         |                                                                             |                                    |                                                                                                |
|----------------------------------------------------------------------------|-----------------------------------------------|-----------------------------------------------------------------------------------------------------------------------------|--------------------------------------------------------------------------------------------------------------------------------------------------------------------------------------|---------------------------------------------------------|-----------------------------------------------------------------------------|------------------------------------|------------------------------------------------------------------------------------------------|
| 1<br>2<br>3<br>4<br>5<br>6<br>7<br>8<br>9<br>10<br>11<br>12                | Strang & Strang (2001). <sup>28</sup> Sweden. | The degree to which patients with a brain tumor and their caregivers cope, understand, and create meaning in the situation. | Malignant tumors, grade 2–4.<br>Treatment stage not described.                                                                                                                       | Not described.                                          | N = 16<br>Further participant information not described.                    | Hermeneutic phenomenological.      | Semistructured interview/structural analysis based on hermeneutic circle described by Ricoeur. |
| 13<br>14<br>15<br>16<br>17<br>18<br>19<br>20<br>21<br>22                   | Tastan et al. (2011). <sup>32</sup> Turkey.   | Caregivers' experience of postoperative phase and homecare.                                                                 | Different types and degrees *<br>All patients had undergone surgery and postoperative treatment and were being treated at home.                                                      | A research and military training hospital in Turkey.    | N = 19<br>M: 4 and F: 6<br>4 spouses<br>4 children<br>1 parent<br>1 sibling | Descriptive qualitative study.     | Semistructured interview/Colaizzi's analysis method.                                           |
| 23<br>24<br>25<br>26<br>27<br>28<br>29<br>30<br>31<br>32<br>33             | Huang et al. (2021). <sup>27</sup> Taiwan     | The lived experience of parents having a child with a brain tumor during the shared decision-making process of treatment    | 4 medulloblastoma<br>3 germ cell tumor<br>1 glioblastoma<br>1 astrocytoma<br>1 ependymoma<br>The interviews were conducted between 1-6 months after the child received the diagnosis | A pediatric oncology ward at a medical center in Taiwan | N=10<br>M: 3 and F: 7                                                       | Descriptive phenomenological study | Semistructured interview/Colaizzi's analysis method.                                           |
| 34<br>35<br>36<br>37<br>38<br>39<br>40<br>41<br>42<br>43<br>44<br>45<br>46 | Wideheim et al. (2002). <sup>26</sup> Sweden. | The experience of a brain tumor from a family perspective.                                                                  | High-grade glioma.<br>The interviews were conducted 2–3 weeks, 3 months, and 6 months postoperatively.                                                                               | Not described.                                          | N = 5<br>Sex unknown<br>2 spouses<br>2 parents                              | Descriptive qualitative study.     | Qualitative interviews/inductive content analysis.                                             |



1  
2  
3  
4  
5  
6  
7  
8  
9  
10  
11  
12  
13  
14  
15  
16  
17  
18  
19  
20  
21  
22  
23  
24  
25  
26  
27  
28  
29  
30  
31  
32  
33  
34  
35  
36  
37  
38  
39  
40  
41  
42  
43  
44  
45  
46

|                                             |                                                                                |                                       |                                                     |                                         |             |                                                     |
|---------------------------------------------|--------------------------------------------------------------------------------|---------------------------------------|-----------------------------------------------------|-----------------------------------------|-------------|-----------------------------------------------------|
|                                             |                                                                                |                                       |                                                     | 1 adult child                           |             |                                                     |
| Zelcer et al. (2010). <sup>33</sup> Canada. | The experience of brain tumor patients and caregivers in the palliative phase. | Malignant *<br>All patients deceased. | Children’s Hospital, London Health Sciences Centre. | N = 25<br>M: 9 and F: 16<br>All parents | Qualitative | Semistructured interview/thematic content analysis. |

1 M = Male, F = Female

\*=Tumor not further described

For peer review only

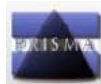

## PRISMA 2020 Checklist

| Section and Topic             | Item # | Checklist item                                                                                                                                                                                                                                                                                       | Location where item is reported |
|-------------------------------|--------|------------------------------------------------------------------------------------------------------------------------------------------------------------------------------------------------------------------------------------------------------------------------------------------------------|---------------------------------|
| <b>TITLE</b>                  |        |                                                                                                                                                                                                                                                                                                      |                                 |
| Title                         | 1      | Coping in the role as next of kin of a person with a brain tumor: a qualitative metasynthesis<br><br><i>The page number refers to the copy without track changes</i>                                                                                                                                 | Page 1, line 1-2                |
| <b>ABSTRACT</b>               |        |                                                                                                                                                                                                                                                                                                      |                                 |
| Abstract                      | 2      | See the PRISMA 2020 for Abstracts checklist.                                                                                                                                                                                                                                                         | Page 1-2, line 18-39            |
| <b>INTRODUCTION</b>           |        |                                                                                                                                                                                                                                                                                                      |                                 |
| Rationale                     | 3      | Describe the rationale for the review in the context of existing knowledge.                                                                                                                                                                                                                          | Page 4, line 78-84              |
| Objectives                    | 4      | Provide an explicit statement of the objective(s) or question(s) the review addresses.                                                                                                                                                                                                               | Page 4, line 85-87              |
| <b>METHODS</b>                |        |                                                                                                                                                                                                                                                                                                      |                                 |
| Eligibility criteria          | 5      | Specify the inclusion and exclusion criteria for the review and how studies were grouped for the syntheses.                                                                                                                                                                                          | Page 5, line 100-109            |
| Information sources           | 6      | Specify all databases, registers, websites, organisations, reference lists and other sources searched or consulted to identify studies. Specify the date when each source was last searched or consulted.                                                                                            | Page 5, line 100-102            |
| Search strategy               | 7      | Present the full search strategies for all databases, registers and websites, including any filters and limits used.                                                                                                                                                                                 | Supplementary material 1        |
| Selection process             | 8      | Specify the methods used to decide whether a study met the inclusion criteria of the review, including how many reviewers screened each record and each report retrieved, whether they worked independently, and if applicable, details of automation tools used in the process.                     | Page 6, line 111-115            |
| Data collection process       | 9      | Specify the methods used to collect data from reports, including how many reviewers collected data from each report, whether they worked independently, any processes for obtaining or confirming data from study investigators, and if applicable, details of automation tools used in the process. | Page 6, line 120-125            |
| Data items                    | 10a    | List and define all outcomes for which data were sought. Specify whether all results that were compatible with each outcome domain in each study were sought (e.g. for all measures, time points, analyses), and if not, the methods used to decide which results to collect.                        | na                              |
|                               | 10b    | List and define all other variables for which data were sought (e.g. participant and intervention characteristics, funding sources). Describe any assumptions made about any missing or unclear information.                                                                                         | na                              |
| Study risk of bias assessment | 11     | Specify the methods used to assess risk of bias in the included studies, including details of the tool(s) used, how many reviewers assessed each study and whether they worked independently, and if applicable, details of automation tools used in the process.                                    | Page 6, line 128-132            |
| Effect measures               | 12     | Specify for each outcome the effect measure(s) (e.g. risk ratio, mean difference) used in the synthesis or presentation of results.                                                                                                                                                                  | na                              |
| Synthesis methods             | 13a    | Describe the processes used to decide which studies were eligible for each synthesis (e.g. tabulating the study intervention characteristics and comparing against the planned groups for each synthesis (item #5)).                                                                                 | Table 2                         |
|                               | 13b    | Describe any methods required to prepare the data for presentation or synthesis, such as handling of missing summary statistics, or data conversions.                                                                                                                                                | Table 1 and 2                   |
|                               | 13c    | Describe any methods used to tabulate or visually display results of individual studies and syntheses.                                                                                                                                                                                               | Table 1 and 2                   |

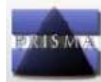

## PRISMA 2020 Checklist

| Section and Topic             | Item # | Checklist item                                                                                                                                                                                                                                                                       | Location where item is reported                    |
|-------------------------------|--------|--------------------------------------------------------------------------------------------------------------------------------------------------------------------------------------------------------------------------------------------------------------------------------------|----------------------------------------------------|
|                               | 13d    | Describe any methods used to synthesize results and provide a rationale for the choice(s). If meta-analysis was performed, describe the model(s), method(s) to identify the presence and extent of statistical heterogeneity, and software package(s) used.                          | Page 7-8                                           |
|                               | 13e    | Describe any methods used to explore possible causes of heterogeneity among study results (e.g. subgroup analysis, meta-regression).                                                                                                                                                 | na                                                 |
|                               | 13f    | Describe any sensitivity analyses conducted to assess robustness of the synthesized results.                                                                                                                                                                                         | na                                                 |
| Reporting bias assessment     | 14     | Describe any methods used to assess risk of bias due to missing results in a synthesis (arising from reporting biases).                                                                                                                                                              | na                                                 |
| Certainty assessment          | 15     | Describe any methods used to assess certainty (or confidence) in the body of evidence for an outcome.                                                                                                                                                                                | na                                                 |
| <b>RESULTS</b>                |        |                                                                                                                                                                                                                                                                                      |                                                    |
| Study selection               | 16a    | Describe the results of the search and selection process, from the number of records identified in the search to the number of studies included in the review, ideally using a flow diagram.                                                                                         | Fig 1                                              |
|                               | 16b    | Cite studies that might appear to meet the inclusion criteria, but which were excluded, and explain why they were excluded.                                                                                                                                                          | na                                                 |
| Study characteristics         | 17     | Cite each included study and present its characteristics.                                                                                                                                                                                                                            | Supplementary materials 2 and page 8, line 177-184 |
| Risk of bias in studies       | 18     | Present assessments of risk of bias for each included study.                                                                                                                                                                                                                         | na                                                 |
| Results of individual studies | 19     | For all outcomes, present, for each study: (a) summary statistics for each group (where appropriate) and (b) an effect estimate and its precision (e.g. confidence/credible interval), ideally using structured tables or plots.                                                     | na                                                 |
| Results of syntheses          | 20a    | For each synthesis, briefly summarise the characteristics and risk of bias among contributing studies.                                                                                                                                                                               | na                                                 |
|                               | 20b    | Present results of all statistical syntheses conducted. If meta-analysis was done, present for each the summary estimate and its precision (e.g. confidence/credible interval) and measures of statistical heterogeneity. If comparing groups, describe the direction of the effect. | na                                                 |
|                               | 20c    | Present results of all investigations of possible causes of heterogeneity among study results.                                                                                                                                                                                       | na                                                 |
|                               | 20d    | Present results of all sensitivity analyses conducted to assess the robustness of the synthesized results.                                                                                                                                                                           | na                                                 |
| Reporting biases              | 21     | Present assessments of risk of bias due to missing results (arising from reporting biases) for each synthesis assessed.                                                                                                                                                              | na                                                 |
| Certainty of evidence         | 22     | Present assessments of certainty (or confidence) in the body of evidence for each outcome assessed.                                                                                                                                                                                  | na                                                 |
| <b>DISCUSSION</b>             |        |                                                                                                                                                                                                                                                                                      |                                                    |
| Discussion                    | 23a    | Provide a general interpretation of the results in the context of other evidence.                                                                                                                                                                                                    | Page 15-17, line 302-353                           |
|                               | 23b    | Discuss any limitations of the evidence included in the review.                                                                                                                                                                                                                      | Page 17-18, line 353-373                           |
|                               | 23c    | Discuss any limitations of the review processes used.                                                                                                                                                                                                                                | Page 17-18, line 353-373                           |
|                               | 23d    | Discuss implications of the results for practice, policy, and future research.                                                                                                                                                                                                       | Page 18, line 376-383                              |

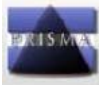

## PRISMA 2020 Checklist

1  
2  
3  
4  
5  
6  
7  
8  
9  
10  
11  
12  
13  
14  
15  
16  
17  
18  
19  
20  
21  
22  
23  
24  
25  
26  
27  
28  
29  
30  
31  
32  
33  
34  
35  
36  
37  
38  
39  
40  
41  
42  
43  
44  
45  
46  
47

| Section and Topic                              | Item # | Checklist item                                                                                                                                                                                                                             | Location where item is reported |
|------------------------------------------------|--------|--------------------------------------------------------------------------------------------------------------------------------------------------------------------------------------------------------------------------------------------|---------------------------------|
| <b>OTHER INFORMATION</b>                       |        |                                                                                                                                                                                                                                            |                                 |
| Registration and protocol                      | 24a    | Provide registration information for the review, including register name and registration number, or state that the review was not registered.                                                                                             | na                              |
|                                                | 24b    | Indicate where the review protocol can be accessed, or state that a protocol was not prepared.                                                                                                                                             | na                              |
|                                                | 24c    | Describe and explain any amendments to information provided at registration or in the protocol.                                                                                                                                            | na                              |
| Support                                        | 25     | Describe sources of financial or non-financial support for the review, and the role of the funders or sponsors in the review.                                                                                                              | na                              |
| Competing interests                            | 26     | Declare any competing interests of review authors.                                                                                                                                                                                         | na                              |
| Availability of data, code and other materials | 27     | Report which of the following are publicly available and where they can be found: template data collection forms; data extracted from included studies; data used for all analyses; analytic code; any other materials used in the review. | na                              |

From: Page MJ, McKenzie JE, Bossuyt PM, Boutron I, Hoffmann TC, Mulrow CD, et al. The PRISMA 2020 statement: an updated guideline for reporting systematic reviews. *BMJ* 2021;372:n71. doi: 10.1136/bmj.n71

For more information, visit: <http://www.prisma-statement.org/>

# BMJ Open

## Coping in the role as next of kin of a person with a brain tumor: a qualitative metasynthesis

|                                 |                                                                                                                                                                                                                                |
|---------------------------------|--------------------------------------------------------------------------------------------------------------------------------------------------------------------------------------------------------------------------------|
| Journal:                        | <i>BMJ Open</i>                                                                                                                                                                                                                |
| Manuscript ID                   | bmjopen-2021-052872.R3                                                                                                                                                                                                         |
| Article Type:                   | Original research                                                                                                                                                                                                              |
| Date Submitted by the Author:   | 29-Jun-2022                                                                                                                                                                                                                    |
| Complete List of Authors:       | Lien, Anette; University of Agder, Faculty of Health and Sport Sciences<br>Rohde, Gudrun; University of Agder, Faculty of Health and Sport Sciences;<br>University College London, Marie Currie Palliative Research Department |
| <b>Primary Subject Heading</b>: | Palliative care                                                                                                                                                                                                                |
| Secondary Subject Heading:      | Health policy                                                                                                                                                                                                                  |
| Keywords:                       | MEDICAL ETHICS, ONCOLOGY, Head & neck tumours < ONCOLOGY                                                                                                                                                                       |
|                                 |                                                                                                                                                                                                                                |

SCHOLARONE™  
Manuscripts



I, the Submitting Author has the right to grant and does grant on behalf of all authors of the Work (as defined in the below author licence), an exclusive licence and/or a non-exclusive licence for contributions from authors who are: i) UK Crown employees; ii) where BMJ has agreed a CC-BY licence shall apply, and/or iii) in accordance with the terms applicable for US Federal Government officers or employees acting as part of their official duties; on a worldwide, perpetual, irrevocable, royalty-free basis to BMJ Publishing Group Ltd ("BMJ") its licensees and where the relevant Journal is co-owned by BMJ to the co-owners of the Journal, to publish the Work in this journal and any other BMJ products and to exploit all rights, as set out in our [licence](#).

The Submitting Author accepts and understands that any supply made under these terms is made by BMJ to the Submitting Author unless you are acting as an employee on behalf of your employer or a postgraduate student of an affiliated institution which is paying any applicable article publishing charge ("APC") for Open Access articles. Where the Submitting Author wishes to make the Work available on an Open Access basis (and intends to pay the relevant APC), the terms of reuse of such Open Access shall be governed by a Creative Commons licence – details of these licences and which [Creative Commons](#) licence will apply to this Work are set out in our licence referred to above.

Other than as permitted in any relevant BMJ Author's Self Archiving Policies, I confirm this Work has not been accepted for publication elsewhere, is not being considered for publication elsewhere and does not duplicate material already published. I confirm all authors consent to publication of this Work and authorise the granting of this licence.

1 **Coping in the role as next of kin of a person with a brain tumor: a**  
2 **qualitative metasynthesis**

3 *Lien, Anette Windsland<sup>1</sup>*

4 [anette\\_lien@hotmail.com](mailto:anette_lien@hotmail.com)

5 Gudrun Rohde<sup>1, 2, 3</sup>

6 [gudrun.e.rohde@uia.no](mailto:gudrun.e.rohde@uia.no)

7  
8 <sup>1</sup>Faculty of Health and Sport Sciences, University of Agder, Kristiansand, Norway

9 <sup>2</sup>Department of Clinical Research, Sorlandet Hospital, Kristiansand, Norway

10 <sup>3</sup>Marie Currie Palliative Research Department, University College London, England

11  
12 **Corresponding author:**

13 Gudrun Rohde, Faculty of Health and Sport Sciences, University of Agder, Postbox 422,

14 4604 Kristiansand, Norway

15  
16 **Word Count:** 3981

17  
18 **ABSTRACT**

19 **Objective:** Being the next of kin of a person with a brain tumor is a stressful experience.

20 For many, being a next of kin involves fear, insecurity, and overwhelming responsibility.

21 The purpose of this study was to identify and synthesize qualitative original studies that

22 explore coping in the role as next of kin of a person with a brain tumor.

23 **Methods:** A qualitative metasynthesis guided by Sandelowski and Barroso's guidelines

24 was used. The databases Medline, CHINAL, and PsycINFO were searched for studies

25 from January 2000 to January 18, 2022. Inclusion criteria were qualitative original studies

1  
2  
3 26 that aimed to explore coping experience by the next of kin of a person with brain tumor.

4  
5 27 The next of kin had to be 18 years of age or older.

6  
7  
8 28 **Results:** Of a total of 1 476 screened records data from 20 studies, including 342  
9  
10 29 participants (207 female, 81 male, and 54 unclassified) were analyzed into metasummaries  
11  
12 30 and a metasyntesis. The metasyntesis revealed that the next of kin coping experiences  
13  
14 31 were characterized by two main themes: 1) Coping factors within the next of kin and as a  
15  
16 32 support system, such as their personal characteristics, perceiving the role as meaningful,  
17  
18 33 having a support system, and hope and religion. 2) Coping strategies – control and  
19  
20 34 proactivity, including regaining control, being proactive, and acceptance.

21  
22  
23  
24 25 **Conclusion:** Next of kin of patients with brain tumors used coping factors and coping  
26  
27 36 strategies gathered within themselves and in their surroundings to handle the situation and  
28  
29 37 their role. It is important that health-care professionals suggest and facilitate these coping  
30  
31 38 factors and strategies because this may reduce stress and make the role of next of kin more  
32  
33 39 manageable.

34  
35  
36  
37 40 **Keywords:** brain tumor; coping factors; coping strategies; metasyntesis; next of kin;  
38  
39 41 review; qualitative studies

40  
41  
42 42

#### 43 **Strengths and limitations of the study**

- 44  
45  
46  
47  
48 44 • The qualitative approach makes an important contribution to the research field by  
49  
50 45 providing a deeper understanding of coping factors and strategies used by the next  
51  
52 46 of kin of a person with a brain tumor.
- 53  
54  
55 47 • Most of the included studies in this metasyntesis were high-quality studies.
- 56  
57  
58  
59  
60



- 1  
2  
3 48 • Our sample is highly multicultural with different geographical origins represented  
4  
5 49 and includes different welfare and health-care systems, and different cultures and  
6  
7 50 religions.  
8  
9  
10 51 • The majority of the sample were women, and a more heterogeneous sample might  
11  
12 52 have revealed more nuanced findings regarding the role of next of kin.  
13  
14  
15 53

## 54 INTRODUCTION

55 In 2020 308,102 people with cancer in the central nervous system were registered  
56 worldwide.<sup>1</sup> The diagnosis brain tumor is very confronting, with 56% of patients  
57 experiencing one or more symptoms. Hemiparesis and cognitive challenges are most  
58 frequently reported but also headaches, nausea and vomiting, vision challenges, epileptic  
59 seizures, and personality changes are considered common symptoms.<sup>2-5</sup> Changes in  
60 behavior and personality are considered particularly challenging, both for the patient and  
61 for the next of kin, as these may include apathy, loss of initiative and empathy,  
62 indifference, selfishness, physical and mental aggression, impaired emotional control and  
63 social skills, and tendencies toward childish behavior, among others.<sup>3 5 6</sup> Studies show that  
64 the disease can be more challenging and stressful for the next of kin than for the patients.  
65 The next of kin have high rates of depression, anxiety, various physical pain, adjustment  
66 difficulties, loneliness, and high work absence, as well as a reduced quality of life.<sup>7-11</sup>  
67 Studies also show that both patients and next of kin miss additional follow-up, support, and  
68 information from health-care providers, family, friends and the community in their struggle  
69 to cope with everyday life.<sup>12 13</sup>

1  
2  
3 70 All these strains can lead to next of kin experiencing stress and lack of coping. Lazarus and  
4  
5 71 Folkman define coping as a cognitive and behavioral endeavor under constant change,  
6  
7 72 dealing with external and/or internal demands that a cognitive assessment indicates as  
8  
9 73 stressful or exceeding personal resources. When dealing with these demands, the next of  
10  
11 74 kin has to review available coping strategies to be able to make the situation more  
12  
13 75 manageable, meaning active actions the next of kin use to cope in the situation. <sup>9 13 14</sup>  
14  
15  
16  
17 76 There are some original qualitative studies that have explored coping in the role as next of  
18  
19 77 kin of a person with a brain tumor. To our knowledge, this research has not been  
20  
21 78 synthesized. Such information is of great importance, especially for health-care providers  
22  
23 79 working with this group of caregivers. With improved understanding, they may be better  
24  
25 80 equipped to facilitate a more manageable everyday life among the next of kin. Previous  
26  
27 81 quantitative research directed at these aspects exist,<sup>8-11 15</sup> but we were interested in studies  
28  
29 82 that were personal and focused on the lived experience of next of kin, hence the choice of  
30  
31 83 qualitative studies. Therefore, the purpose of this metasynthesis was to identify and  
32  
33 84 synthesize evidence from original qualitative studies regarding the experience of coping in  
34  
35 85 the role as next of kin of a person with a brain tumor. The findings are discussed in the  
36  
37 86 context of Lazarus' and Folkman's stress theory<sup>14</sup> and their approach to coping with stress  
38  
39 87 in order to interpret our findings in a theoretical context.  
40  
41  
42  
43  
44  
45

## 46 **METHODS**

### 47 ***Design***

48  
49  
50 89 The study is a metasynthesis within the interpretative paradigm. It was inspired by a  
51  
52 90 phenomenological–hermeneutic design because the aim was to identify and synthesize  
53  
54 91 qualitative original studies that explored next of kin attitudes and experiences.<sup>16</sup> The  
55  
56  
57  
58  
59  
60

1  
2  
3 93 metasynthesis process consisted of five steps: (1) formulating the purpose and rationale of  
4  
5 94 the study; (2) searching for and retrieving relevant qualitative research studies; (3)  
6  
7 95 critically appraising the included studies; (4) classifying the findings, and finally; (5)  
8  
9  
10 96 synthesizing the findings.

### 11 12 13 97 ***Search strategy***

14  
15 98 In collaboration with an experienced librarian, we conducted a systematic search in the  
16  
17 99 PsycINFO, OVID, CHINAL, and Medline databases via the EBSCO host from January  
18  
19  
20 100 2000 until 18 January 2022. For search strategy see supplementary materials 1.

21  
22  
23 101 The inclusion criteria were qualitative original studies published in English, Norwegian,  
24  
25 102 Swedish or Danish that aimed to explore coping experience by the next of kin of a person  
26  
27 103 with a brain tumor, regardless of tumor type and stage which enhanced their role as next of  
28  
29 104 kin. The next of kin had to be 18 years of age or older. The exclusion criteria were studies  
30  
31 105 that did not clearly identify coping, coping that included the participants' experiences in  
32  
33 106 the role of bereaved and not next of kin, and studies including diagnoses other than a brain  
34  
35 107 tumor.

### 36 37 38 39 108 ***Search outcome***

40  
41  
42 109 The search strategy generated 1 476 unique citations. Titles and abstracts were screened by  
43  
44 110 the authors using Rayyan, a systematic review management software.<sup>17</sup> A final consensus  
45  
46 111 regarding the eligible articles was obtained through a group discussion between the  
47  
48 112 authors. Seventy-two papers were read in full and evaluated against the inclusion criteria  
49  
50 113 by both authors; 20 of these were included in the metasynthesis. Figure 1 shows the  
51  
52 114 Preferred Reporting Items for Systematic Reviews and Meta-Analyses (PRISMA)  
53  
54 115 flowchart with a full overview of the screening process. The search output is presented in

1  
2  
3 116 the PRISMA flowchart. The authors read the full text of the eligible articles and  
4  
5 117 independently extracted data from the included studies; this process is also illustrated in  
6  
7 118 Figure 1. Consensus for data extraction was obtained as part of a group discussion between  
8  
9  
10 119 the authors. Supplementary materials 2 lists the title, author(s), study country, year of  
11  
12 120 publication, aim, analysis, and study participants of all included studies. Most studies were  
13  
14 121 from Europe: Sweden (3), Great Britain (3), Denmark (1), Belgium (1), and Turkey (1);  
15  
16 122 seven were from Canada (3) and the USA (4), two from Australia and two from Taiwan.  
17  
18 123 The tumor type and stage varied. For details, see supplementary materials 2.  
19  
20

21  
22 124 Figure 1 about here  
23  
24

### 25 125 ***Quality appraisal***

26  
27 126 The quality of the 20 papers was evaluated using the Critical Appraisal Skills Program  
28  
29 127 (CASP) for qualitative studies. The first evaluation was conducted blinded and  
30  
31 128 independently by AWL and GR whose CASP evaluations were then compared. Using the  
32  
33 129 criteria in CASP for independent assessment, the authors mutually agreed on a final quality  
34  
35 130 evaluation. For details, see Table 1.  
36  
37  
38

39 131 The included studies that were appraised according to CASP are listed in Table 2. All  
40  
41 132 studies had clearly stated the study aim and the qualitative methodologies were considered  
42  
43 133 appropriate. Furthermore, several of the studies had been published in highly ranked  
44  
45 134 journals. The most poorly addressed issue (criteria number 6 in the CASP list) was the  
46  
47 135 influence of the researcher on the research and vice versa.  
48  
49

50  
51 136 Table 1 about here  
52  
53  
54  
55  
56  
57  
58  
59  
60

1  
2  
3 137 ***Data abstraction and analyses***  
4

5  
6 138 As suggested by Sandelowski and Barroso,<sup>16</sup> two approaches to qualitative synthesis were  
7  
8 139 used. The first of these involved qualitative metasummaries of qualitative findings from  
9  
10 140 the original studies. This method is defined as qualitative, but the findings are presented  
11  
12 141 quantitatively. The second involved a metasynthesis that developed new interpretations of  
13  
14 142 the target findings from the original studies.<sup>16</sup> The narrative analysis was inspired by  
15  
16 143 Lindseth and Nordberg's phenomenological–hermeneutic methods.<sup>18</sup> Three steps were  
17  
18 144 followed. First, the empirical materials were read several times. Second, after extraction,  
19  
20 145 the target findings were imported into NVivo 11 data management software for further  
21  
22 146 analysis.<sup>19</sup> The text was read line-by-line to identify meaning units, subthemes, and  
23  
24 147 themes. Third, the researchers aimed to achieve a comprehensive understanding of the  
25  
26 148 empirical materials, meaning units, and themes, and to relate these to the aim and research  
27  
28 149 question of the metasynthesis.<sup>18</sup> The analytic themes were identified by AWL and  
29  
30 150 discussed with GR. The process of deriving the themes was inductive. The contribution of  
31  
32 151 targeted findings from each of the included papers is outlined, and quotations are used to  
33  
34 152 illustrate and support the findings, something which increases the trustworthiness of the  
35  
36 153 study. To validate the findings, both authors participated in discussions of the empirical  
37  
38 154 analysis and in writing up the findings. Ethical approval was not required for the study.  
39  
40  
41  
42  
43  
44

45 155 Table 2 about here

46  
47  
48 156 Qualitative metasynthesis enables researchers to identify specific research questions,  
49  
50 157 search for, appraise, summarize, and combine qualitative evidence to address the research  
51  
52 158 question. Metasynthesis provides novel interpretations of the target findings from the  
53  
54 159 original studies. <sup>16</sup> In our methasynthesis we identified two main themes: 1) coping factors  
55  
56 160 within the next of kin themselves and as a support system and 2) coping strategies –  
57  
58  
59  
60

1  
2  
3 161 control and proactivity, each comprising 3-4 subthemes. For a list of the studies that  
4  
5 162 generated findings regarding the main themes and subthemes, see Table 2. When  
6  
7 163 analyzing and organizing the results into themes and subthemes we chose to be in line with  
8  
9 164 the content and meaning of coping in the original included studies, although some of the  
10  
11 165 results could have been considered to also contributed and organized differently. The  
12  
13 166 results will be elaborated below.  
14  
15  
16  
17

## 18 167 **PATIENT AND PUBLIC INVOLVEMENT**

19  
20  
21  
22 168 No patients or patient organizations were involved in the planning of the study, the  
23  
24 169 analyses or the writing of the metasynthesis. These were based on published original  
25  
26 170 studies some of which included patient involvement.  
27  
28  
29

## 30 171 **RESULTS**

31  
32  
33  
34 172 The results are presented as metasummaries supported by tables and figures, and as a  
35  
36 173 metasynthesis containing two main themes. The themes are supported by illustrative  
37  
38 174 quotes from the included original studies.  
39  
40

### 41 175 *Metasummaries*

42  
43  
44 176 The 20 studies that were included comprised 342 participants (207 women, 81 men, and 54  
45  
46 177 not classified). The focus was on the following themes: the needs of the next of kin;<sup>2 20-24</sup>  
47  
48 178 their overall experiences as next of kin;<sup>10 25-27</sup> coping and coping strategies;<sup>28-30</sup>  
49  
50 179 postoperative caregiving;<sup>31 32</sup> being a next of kin in the palliative phase;<sup>33 34</sup> experienced  
51  
52 180 support factors;<sup>35</sup> how the caregiving changed over time;<sup>36</sup> and factors influencing  
53  
54 181 treatment choice in the palliative phase.<sup>37</sup> Three of the studies were undertaken six months  
55  
56  
57  
58  
59  
60

1  
2  
3 182 after diagnosis,<sup>27 30 31 36</sup> and three in the patients' palliative phase or postmortem.<sup>33 34 37</sup> In  
4  
5 183 six studies the patients were children of the informants.<sup>10 29 30 33 34</sup>  
6  
7

8 184 ***Metasynthesis***  
9

10 185 *Main theme 1: Coping factors within the next of kin and as a support system*  
11

12 186 Nineteen of the included studies provided data regarding the first main theme; *Coping*  
13  
14 187 *factors within the next of kin and as external support* (see table 2). This main theme  
15  
16 188 comprised the following four sub themes: *personal characteristics, perceiving the role as*  
17  
18 189 *meaningful, having a support system, and hope and religion.*  
19  
20  
21  
22

23 190 *Personal characteristics* such as a strong and positive personality were important coping  
24  
25 191 factors for next of kin in new challenging situations.<sup>25 29 37</sup> Being able to show empathy for  
26  
27 192 the patient and the health professionals was important, if not the situation could easily  
28  
29 193 engender feelings such as discouragement and reproach.<sup>25</sup> A positive mood and a sense of  
30  
31 194 humor were also emphasized for the same reasons.<sup>29</sup>  
32  
33  
34

35 195 To perceive the role as next of kin as *meaningful* was important, as it made the next of kin  
36  
37 196 feel needed and productive in the situation.<sup>23 25 28 31</sup> Engagement and commitment in the  
38  
39 197 care of their relatives were highlighted as important by many next of kin, especially when  
40  
41 198 the patients appreciated the help.<sup>23</sup> The engagement was even stronger when the emotional  
42  
43 199 bond between patient and next of kin was strong.<sup>20 21 29 35</sup>  
44  
45  
46

47 200 *"But caring for him is something I will do—it is not a burden."*<sup>31</sup> (p. 81)  
48  
49

50 201 However, other studies revealed less engagement and commitment, and underlined anger  
51  
52 202 and reluctance with the new role as the heavy responsibility and sacrifice impacted the  
53  
54 203 next of kin's own needs and wishes.<sup>21 22 25 31 33</sup>  
55  
56  
57  
58  
59  
60

1  
2  
3 204 *Having a support system* made the role of next of kin easier to cope with. The support was  
4  
5 205 given by family, friends, neighbors, colleagues and workplaces, health personnel, schools,  
6  
7 206 the religious community, people in the local community, and even strangers.<sup>2 10 20-35</sup> The  
8  
9  
10 207 support from health-care professionals was especially important. This support included  
11  
12 208 emotional support and assistance during patient care and treatment.<sup>2 10 20-27 29-35</sup> The  
13  
14 209 importance of assistance such as medical supervision and nursing care was emphasized,<sup>10</sup>  
15  
16 210 <sup>22 29</sup> with next of kin noting that this made it possible to feel like a partner again,<sup>23</sup> while at  
17  
18 211 the same time allowing for anticipated time alone.<sup>24</sup> A familiar health-care professional  
19  
20 212 was crucial in making this possible, because it implied that the patient would receive the  
21  
22 213 best care as they were known to the health-care professional, and also because the  
23  
24 214 assistance was considered to be less intrusive.<sup>23 24</sup> To experience the assistance with care as  
25  
26 215 a coping factor, it was crucial that the care was compassionate and of the best quality.  
27  
28 216 These qualities emphasized the health professionals genuine care and gave the patients and  
29  
30 217 the next of kin hope and a desire to fight the disease.<sup>10 21 23 26 27 29</sup>

31  
32  
33  
34  
35  
36 218 *“She (neurosurgeon) had to give us some bad news some of the time...*  
37  
38 219 *and you couldn’t ask for a better manner in her delivery of that bad*  
39  
40 220 *news, or her support in what we were going through.”<sup>35</sup> (p. 8)*

41  
42  
43  
44 221 When next of kin experienced that their loved ones received a low quality of care or  
45  
46 222 suffered malpractice it caused mistrust of the health-care system and weakened the  
47  
48 223 experience of health-care professionals as a support factor.<sup>10 20 23 24</sup> Emotional support from  
49  
50 224 health-care professionals implied an acknowledgment that the disease affected not only the  
51  
52 225 patients, but also their next of kin. It also implied that the health-care professionals  
53  
54 226 recognized and met the wishes of the next of kin for active participation in monitoring the  
55  
56  
57  
58  
59  
60



1  
2  
3 227 patients disease course.<sup>23 25 26 34</sup> Next of kin who did not have such involvement felt  
4  
5 228 ignored, useless and helpless.<sup>25 29</sup> Supportive conversations with health-care professionals  
6  
7 229 were highly appreciated by many next of kin. However, this required the health-care  
8  
9 230 professional's understanding and empathy for the situation of the patient as well as of their  
10  
11  
12 231 next of kin, and preferably that they should be always available.<sup>21 23 26 30 31 37</sup>

13  
14  
15 232 Support from family and friends was invaluable in the care tasks and in coping with the  
16  
17 233 role of next of kin.

18  
19  
20 234 *“Just support from family and friends, that was important to me, and just*  
21  
22 *knowing that I could call on them... ”*<sup>22</sup> (p. 1098)

23  
24  
25  
26 236 Social, practical, and emotional support was emphasized, and included such things as  
27  
28 237 economic help, childcare, transport and housekeeping.<sup>10 22 24 25 29-32 34 35</sup> Some next of kin  
29  
30 238 would have appreciated even more support and help from family and friends, preferably  
31  
32 239 given on the family and friends' own initiative.<sup>20 22 24 25 35 36</sup>

33  
34  
35  
36 240 Discussions with family and friends were also important,<sup>21 24 25 27</sup> and could even create a  
37  
38 241 stronger bond.<sup>25</sup> Such a bond required families and friends to understand and recognize the  
39  
40 242 challenges faced by the next of kin.<sup>24</sup> Support groups and conversations with other next of  
41  
42 243 kin were also highlighted as important,<sup>2 22 24 30 34 35 37</sup> as they might broaden the next of  
43  
44 244 kin's understanding of the tumor and what they might expect in the future.<sup>27</sup> These  
45  
46 245 conversations could be face-to-face or via the Internet.<sup>2 22 24 30 34 35 37</sup>

47  
48  
49  
50 246 *“From time to time, I need to be able to talk to someone. Because when I*  
51  
52 *lay down in the evening, then it starts to work in the inside.”*<sup>23</sup> (p. 411)

1  
2  
3 248 On the other hand, support groups were also considered demanding because it was difficult  
4  
5 249 to listen to other families' stories. Furthermore, for some it was considered a waste of time  
6  
7  
8 250 to spend valuable hours with people other than their closest family members.<sup>10 22 31</sup>

9  
10 251 *Hope and religion* were emphasized as important coping factors. The next of kin hoped  
11  
12 252 that a miraculous treatment would be developed so that their loved ones could survive the  
13  
14  
15 253 disease or just have a better quality of life.<sup>2 10 20-23 26 33 34</sup>

16  
17  
18 254 *You see a positive evolution, and everything that goes better is good for*  
19  
20 255 *her. (...) Nobody can forbid us to have hope. And miracles happen.*  
21  
22  
23 256 *Whether we believe it or not, that's not the point, it is the only thing to*  
24  
25 257 *focus on.*"<sup>23</sup> (p. 409)

26  
27  
28 258 Hope gave a reason to fight, although it weakened in the palliative phase.<sup>21 26 34</sup> Faith  
29  
30 259 strengthened the hope of healing during the treatment period and gave some form of peace  
31  
32  
33 260 in the final palliative phase. In most cases, hope was related to faith.<sup>25-27 30 34 37</sup>

34  
35  
36  
37 261 *Main theme 2: Coping strategies – control and proactivity*

38  
39  
40 262 Eighteen of the included studies provided data regarding the second main theme; *Coping*  
41  
42 263 *strategies – control and proactivity* (see table 2). This main theme comprised the three  
43  
44 264 subthemes: *regaining control, being proactive and acceptance.*

45  
46  
47  
48 265 *Regaining control* of the situation was a frequent coping strategy, and for most this  
49  
50 266 included gathering enough information to allow an overview of what to expect, something  
51  
52 267 which implied some form of security.<sup>10 20-23 27 30 35 37</sup>

1  
2  
3 268 *“So it’s a, it’s a roller coaster of emotion but for the most part I’ve been,*  
4  
5 269 *‘What do we need to do? Where do we need to be?’ And then just read,*  
6  
7 270 *read, read whatever I can find out, whatever information because I feel*  
8  
9  
10 271 *like whatever I know, I can ask for.”*<sup>30</sup> (p. 34)  
11  
12

13 272 The information that was gathered and provided should preferably be adapted to the  
14  
15 273 situation and the disease trajectory, and had been given by health-care professionals.<sup>20 22 23</sup>  
16  
17 274 <sup>25 27 29 37</sup> The next of kin often hid this information from the patients to protect them and  
18  
19  
20 275 not diminish their hope.<sup>10 26 30 31 34</sup>  
21  
22

23 276 To regain control meant not only control of the diagnosis, but also personal control and  
24  
25 277 control over own reactions. In some cases, the next of kin denied their feelings. Some even  
26  
27 278 denied the entire diagnosis,<sup>20 25 29 30</sup> and instead focused on being strong for the patient and  
28  
29 279 the entire family.<sup>23 25 30 32-34 36</sup> One next of kin in Edvardsson and Ahlstroms’ (2008)  
30  
31 280 study<sup>25</sup> reported:  
32  
33  
34

35 281 *“I’ve sort of stowed it all away, I suppose. It is as if I’d experienced it from the*  
36  
37 282 *outside or seen it on TV. It’s often that way with sorrowful things.”* (p. 588)  
38  
39

40 283 *Being proactive*, facilitating and encouraging the patient to fight the disease were also  
41  
42 284 important coping strategies, as it felt better than accepting the morbid situation and not do  
43  
44 285 anything.<sup>10 21 25 26 34</sup>  
45  
46  
47

48 286 *“People ask you how you cope. But what if you were to give up? You’ve*  
49  
50 287 *got to cope—and we do have each other! (...).”*<sup>25</sup> (p. 588)  
51  
52

53 288 This implied adopting a healthier lifestyle, including a change in diet and exercise habits,  
54  
55 289 hoping that this would improve the effects of medical treatment,<sup>21 26</sup> or trying alternative  
56  
57  
58  
59  
60

1  
2  
3 290 treatments.<sup>10 34</sup> However, an increasing feeling of powerlessness was emphasized if the  
4  
5 291 fight, in the form of these actions and treatments, did not meet the hope of a cure.<sup>21 23 26 34</sup>  
6  
7  
8 292 As the disease progressed and life went on there was a strive for normality, particularly in  
9  
10 293 families with children. This lead most next of kin into a strategy of *acceptance*, as  
11  
12 294 everyday life continued. This involved work, school for children and hobbies.<sup>10 26 28 30 34 10</sup>  
13  
14  
15 295 <sup>26 28 30 31 33 34 36</sup> Although this was an important and expected strategy, accepting disease  
16  
17 296 progression or a bad diagnosis was challenging, especially when the patient was a child.<sup>34</sup>  
18  
19

## 20 21 297 **DISCUSSION**

22  
23  
24 298 This metasynthesis aimed to explore coping in the role as next of kin of a person with a  
25  
26 299 brain tumor. This generated two main themes: 1) coping factors within the next of kin and  
27  
28 300 as a support system, 2) and coping strategies – control and proactivity. Valuable coping  
29  
30 301 factors included personal characteristics, perceiving the role as next of kin as meaningful,  
31  
32 302 having a support system, and hope and religion. Active strategies to manage the situation  
33  
34 303 involved regaining control, being proactive, and acceptance.<sup>14 38</sup>  
35  
36  
37 304 Being the next of kin to a person with a brain tumor is considered to be a negative stressor  
38  
39 305 because of the challenging life situation and care tasks. Nevertheless, several next of kin  
40  
41 306 who were included in the metasynthesis expressed a desire to be proactive, fight the  
42  
43 307 disease and to gain control over the situation. This is described by Lazarus and Folkman<sup>14</sup>  
44  
45 308 as a secondary assessment of the situation, in which the next of kin decide which measures  
46  
47 309 to implement. One such measure could be to gain personal control—one of the most  
48  
49 310 important and stress-reducing personal strategies available.<sup>14</sup>  
50  
51  
52  
53  
54  
55  
56  
57  
58  
59  
60

1  
2  
3 311 A possible explanation for the proactive attitude of next of kin toward the disease may be  
4  
5 312 their obligation and commitment to the patient. Commitment is an expression of something  
6  
7 313 of great importance and can cause some to be willing to meet threats and challenges that he  
8  
9  
10 314 or she would otherwise avoid.<sup>14</sup> However, our findings revealed that the experience of  
11  
12 315 contributing to something meaningful, not the obligation to do so, promoted coping in the  
13  
14 316 situation. We consider that this is caused by the fact that obligation does not automatically  
15  
16 317 make an action meaningful, but rather that it can be experienced as a compulsion. This  
17  
18 318 assumption is strengthened by the findings that the tasks as next of kin may arouse  
19  
20 319 emotions such as anger and aversion towards the patient and the diagnosis, rather than  
21  
22 320 coping. Several studies refer to the same ambivalent experience regarding commitment and  
23  
24 321 attitudes toward being a next of kin.<sup>39 40</sup>

25  
26  
27  
28  
29 322 Having a support system was the factor that most relatives emphasized as promoting  
30  
31 323 coping. It was described as invaluable something which was also confirmed in other  
32  
33 324 studies,<sup>41 42</sup> and in Lazarus and Folkman's transactional stress theory.<sup>14</sup> At the same time,  
34  
35 325 in both this metasynthesis and in other studies, next of kin voiced a strong desire and  
36  
37 326 longing for even greater external support.<sup>41 42</sup> The findings of the metasynthesis also  
38  
39 327 showed that the configuration and arrangement of the support, especially that given by  
40  
41 328 health-care providers are of great importance. An explanation for the next of kin's  
42  
43 329 experience of unmet needs might be lack of knowledge among health-care providers about  
44  
45 330 how to assist at the right time. This may indicate that in some cases health-care providers  
46  
47 331 should pay more attention to offering support in line with the individual needs of the next  
48  
49 332 of kin and the care situations.

50  
51  
52  
53  
54 333 The findings of this metasynthesis show that several next of kin considered hope to be an  
55  
56 334 important coping factor, especially during the disease trajectory. Hope has also been

1  
2  
3 335 shown to be an strengthening coping factor in several studies,<sup>43 44</sup> and transactional stress  
4  
5 336 theory states that faith and hope are two of the most important personal factors in the  
6  
7 337 cognitive assessment of stressors.<sup>14 38</sup> Furthermore, according to Lazarus and Folkman,<sup>14</sup>  
8  
9 338 the two factors are strongly related, which is consistent with the findings in our  
10  
11 339 metasynthesis. For several next of kin, hope was strongly grounded in religion. This was  
12  
13 340 especially prominent in the studies conducted in the palliative phase, which indicated that  
14  
15 341 faith is strengthened when there is no hope of curative treatment. The same pattern has also  
16  
17 342 been reported in other studies describing cancer patients' experiences of palliative care.<sup>45 46</sup>  
18  
19 343  
20  
21  
22  
23  
24 344 As the disease progressed, several next of kin chose an acceptance strategy toward the  
25  
26 345 diagnosis and its burden. Their fight against the disease diminished to some extent, and  
27  
28 346 instead the relatives tried to "normalize" everyday life as much as possible. A similar  
29  
30 347 strategy is also reported by next of kin of other cancer patients, especially in the palliative  
31  
32 348 phase.<sup>47 48</sup> Lazarus and Folkman describe this as a reassessment, referring to a changed  
33  
34 349 cognitive assessment of the stressor based on new information from the environment  
35  
36 350 and/or the person himself or herself.<sup>14</sup>  
37  
38  
39  
40  
41

## 42 **Strengths and limitations**

43  
44  
45 352 A strength of this metasynthesis is that the primary search in the databases was conducted  
46  
47 353 with the assistance of an experienced librarian in an attempt to ensure that as many as  
48  
49 354 possible of the relevant studies were included.<sup>49</sup> Furthermore, most of the included studies  
50  
51 355 were of high methodological quality (see Table 2). Our sample was also highly  
52  
53 356 multicultural (see Table 1). This attribute strengthens the validity of the metasynthesis  
54  
55 357 since geographical origin might have affected the study sample because of different  
56  
57  
58  
59  
60

1  
2  
3 358 participant backgrounds related to different welfare and health-care systems, cultures,  
4  
5 359 and/or religions.  
6  
7

8 360 A limitation of our metasynthesis is that one of the 72 articles that was intended to be read  
9  
10 361 in full text could not be obtained.<sup>50</sup> The formation of the subthemes is also a possible  
11  
12 362 limitation. Some of the subthemes, or parts of their content, could also have been  
13  
14 363 categorized in the other main theme. Both main themes and subthemes overlap in several  
15  
16 364 cases, and we have read similar studies<sup>26 30</sup> where the findings are categorized differently  
17  
18 365 than in our metasynthesis. We chose to be true to the informants' statements, the  
19  
20 366 organization and meaning of the original studies that were included, and allocated the  
21  
22 367 findings based on the informants' way of speaking and description of the experience.  
23  
24 368 Another possible limitation is that our sample consisted mainly of women (see  
25  
26 369 supplementary materials 2). A more heterogeneous sample might have revealed more  
27  
28 370 nuanced findings and different experiences of the role of the next of kin.  
29  
30  
31  
32

## 33 371 **CONCLUSION**

34  
35  
36  
37  
38 372 The findings of this metasynthesis show that next of kin experience and use a range of  
39  
40 373 coping factors and strategies in their role. Their experience is marked by individual  
41  
42 374 differences. It is of great importance that health-care providers offer assistance which is  
43  
44 375 individually adapted to these coping factors and strategies because this may reduce stress  
45  
46 376 among the next of kin. The coping experience seems to go through phases, and further  
47  
48 377 information is needed to fully understand how and when the various factors and strategies  
49  
50 378 are used as the disease progresses. Longitudinal studies would therefore be of particular  
51  
52 379 interest in this field.  
53  
54  
55  
56  
57  
58  
59  
60

1  
2  
3 381 **Supplementary information**  
4  
5

6 382 The manuscript has been edited by OnLine English (<https://www.oleng.com.au>) to comply  
7  
8 383 with international publishing guidelines.  
9  
10

11  
12 384 **Authors' contributions**  
13  
14

15 385 AWL and GR designed the research project and developed the research plan. AWL was  
16  
17 386 responsible for the literature search, while AWL and GR were responsible for the analysis.  
18  
19 387 Both authors were involved in the screening and inclusion of the studies, reviewed the  
20  
21 388 manuscript, and contributed to the revision of the paper. Both authors read and approved  
22  
23 389 the final version of the paper.  
24  
25  
26

27  
28 390 **Funding**  
29  
30

31 391 This research did not receive grants from any funding agency in the public, commercial, or  
32  
33 392 not-for-profit sectors.  
34  
35

36  
37 393 **Competing interests**  
38  
39

40 394 The authors declare that they have no competing interests.  
41  
42

43 395 **Patient consent for publication**  
44  
45

46 396 Not required  
47  
48

49 397 **Ethics approval**  
50  
51

52 398 Ethical approval was not required, as no primary data were collected as part of this study.  
53  
54

55 399 **Data availability**  
56  
57

58 400 Data are available on reasonable request.  
59  
60



401 **References**

- 402
- 403 1. World Cancer Research Fund. Worldwide cancer data 2018 [Available from:  
404 <https://www.wcrf.org/dietandcancer/cancer-trends/worldwide-cancer-data>.  
405 2. Arber A, Faithfull S, Plaskota M, et al. A study of patients with a primary malignant  
406 brain tumour and their carers: symptoms and access to services. *Int J Palliat Nurs*  
407 2010;16(1):24-30. doi: 10.12968/ijpn.2010.16.1.46180 [published Online First:  
408 2010/01/22]
- 409 3. Voß H, Scholz-Kreisel P, Richter C, et al. Development of screening questions for  
410 doctor-patient consultation assessing the quality of life and psychosocial burden of  
411 glioma patients: an explorative study. *Qual Life Res* 2021;30(5):1513-22. doi:  
412 10.1007/s11136-021-02756-x [published Online First: 2021/02/01]
- 413 4. Armstrong TS, Dirven L, Arons D, et al. Glioma patient-reported outcome assessment in  
414 clinical care and research: a Response Assessment in Neuro-Oncology  
415 collaborative report. *Lancet Oncol* 2020;21(2):e97-e103. doi: 10.1016/s1470-  
416 2045(19)30796-x [published Online First: 2020/02/03]
- 417 5. Noll K, King AL, Dirven L, et al. Neurocognition and Health-Related Quality of Life  
418 Among Patients with Brain Tumors. *Hematol Oncol Clin North Am*  
419 2022;36(1):269-82. doi: 10.1016/j.hoc.2021.08.011 [published Online First:  
420 2021/10/30]
- 421 6. Helvoirt Rv, Holt, M. H., Bjerva, J., Langfeldt, B., Throndsen, A., & Drangsholt, L. K. .  
422 Dagpost-basert multidisiplinær tilbud for pasienter med høygradig gliom: første  
423 erfaringer ved Senter for kreftbehandling (SFK), Kristiansand. *ONKONYTT* 2016
- 424 7. Applebaum AJ, Kryza-Lacombe M, Buthorn J, et al. Existential distress among  
425 caregivers of patients with brain tumors: a review of the literature. *Neurooncol*  
426 *Pract* 2016;3(4):232-44. doi: 10.1093/nop/npv060 [published Online First:  
427 2016/12/01]
- 428 8. Geng HM, Chuang DM, Yang F, et al. Prevalence and determinants of depression in  
429 caregivers of cancer patients: A systematic review and meta-analysis. *Medicine*  
430 *(Baltimore)* 2018;97(39):e11863. doi: 10.1097/md.0000000000011863 [published  
431 Online First: 2018/10/04]
- 432 9. Cavers D, Hacking B, Erridge SE, et al. Social, psychological and existential well-being  
433 in patients with glioma and their caregivers: a qualitative study. *Cmaj*  
434 2012;184(7):E373-82. doi: 10.1503/cmaj.111622 [published Online First:  
435 2012/03/21]
- 436 10. Russell B, Collins A, Dowling A, et al. Predicting distress among people who care for  
437 patients living longer with high-grade malignant glioma. *Support Care Cancer*  
438 2016;24(1):43-51. doi: 10.1007/s00520-015-2739-0 [published Online First:  
439 2015/04/26]
- 440 11. Wasner M, Paal P, Borasio GD. Psychosocial care for the caregivers of primary  
441 malignant brain tumor patients. *J Soc Work End Life Palliat Care* 2013;9(1):74-95.  
442 doi: 10.1080/15524256.2012.758605 [published Online First: 2013/02/27]
- 443 12. Applebaum AJ, Buda K, Kryza-Lacombe M, et al. Prognostic awareness and  
444 communication preferences among caregivers of patients with malignant glioma.

- 1  
2  
3 445 *Psychooncology* 2018;27(3):817-23. doi: 10.1002/pon.4581 [published Online  
4 446 First: 2017/11/11]  
5 447 13. Cavers D, Hacking B, Erridge SC, et al. Adjustment and support needs of glioma  
6 448 patients and their relatives: serial interviews. *Psychooncology* 2013;22(6):1299-  
7 449 305. doi: 10.1002/pon.3136 [published Online First: 2012/08/01]  
8 450 14. Lazarus RS, Folkman S. Stress, appraisal, and coping. New York: Springer 1984.  
9 451 15. Crooms RC, Goldstein NE, Diamond EL, et al. Palliative Care in High-Grade Glioma:  
10 452 A Review. *Brain Sci* 2020;10(10) doi: 10.3390/brainsci10100723 [published  
11 453 Online First: 2020/10/18]  
12 454 16. Sandelowski M, Barroso J. Handbook for synthesizing qualitative research. New York:  
13 455 Springer 2007.  
14 456 17. Ouzzani M, Hammady, H., Fedorowicz, Z., & Elmagarmid, A. . Systematic Reviews  
15 457 2016 [Available from: <https://rayyan.qcri.org/welcome>.  
16 458 18. Lindseth A, Norberg A. A phenomenological hermeneutical method for researching  
17 459 lived experience. *Scand J Caring Sci* 2004;18(2):145-53. doi: 10.1111/j.1471-  
18 460 6712.2004.00258.x [published Online First: 2004/05/19]  
19 461 19. QSR International. NVIVO 2020 [Available from:  
20 462 <https://www.qsrinternational.com/nvivo-qualitative-data-analysis-software/home>.  
21 463 20. Schubart JR, Kinzie MB, Farace E. Caring for the brain tumor patient: family caregiver  
22 464 burden and unmet needs. *Neuro Oncol* 2008;10(1):61-72. doi: 10.1215/15228517-  
23 465 2007-040 [published Online First: 2007/11/13]  
24 466 21. Piil K, Juhler M, Jakobsen J, et al. Daily Life Experiences of Patients With a High-  
25 467 Grade Glioma and Their Caregivers: A Longitudinal Exploration of Rehabilitation  
26 468 and Supportive Care Needs. *J Neurosci Nurs* 2015;47(5):271-84. doi:  
27 469 10.1097/jnn.000000000000158 [published Online First: 2015/09/09]  
28 470 22. Janda M, Eakin EG, Bailey L, et al. Supportive care needs of people with brain  
29 471 tumours and their carers. *Support Care Cancer* 2006;14(11):1094-103. doi:  
30 472 10.1007/s00520-006-0074-1 [published Online First: 2006/05/20]  
31 473 23. Coolbrandt A, Sterckx W, Clement P, et al. Family Caregivers of Patients With a High-  
32 474 Grade Glioma: A Qualitative Study of Their Lived Experience and Needs Related  
33 475 to Professional Care. *Cancer Nurs* 2015;38(5):406-13. doi:  
34 476 10.1097/ncc.0000000000000216 [published Online First: 2014/12/19]  
35 477 24. Arber A, Hutson N, de Vries K, et al. Finding the right kind of support: a study of  
36 478 carers of those with a primary malignant brain tumour. *Eur J Oncol Nurs*  
37 479 2013;17(1):52-8. doi: 10.1016/j.ejon.2012.01.008 [published Online First:  
38 480 2012/03/03]  
39 481 25. Edvardsson T, Ahlström G. Being the next of kin of a person with a low-grade glioma.  
40 482 *Psychooncology* 2008;17(6):584-91. doi: 10.1002/pon.1276 [published Online  
41 483 First: 2007/10/25]  
42 484 26. Wideheim AK, Edvardsson T, Pahlson A, et al. A family's perspective on living with a  
43 485 highly malignant brain tumor. *Cancer Nurs* 2002;25(3):236-44. doi:  
44 486 10.1097/00002820-200206000-00012 [published Online First: 2002/06/01]  
45 487 27. Huang TY, Mu PF, Chen YW. The Lived Experiences of Parents Having a Child With  
46 488 a Brain Tumor During the Shared Decision-Making Process of Treatment. *Cancer*  
47 489 *Nurs* 2021 doi: 10.1097/ncc.0000000000000979 [published Online First:  
48 490 2021/09/02]

- 1  
2  
3 491 28. Strang S, Strang P. Spiritual thoughts, coping and 'sense of coherence' in brain tumour  
4 492 patients and their spouses. *Palliat Med* 2001;15(2):127-34. doi:  
5 493 10.1191/026921601670322085 [published Online First: 2001/04/17]  
6 494 29. Shortman RI, Beringer A, Penn A, et al. The experience of mothers caring for a child  
7 495 with a brain tumour. *Child Care Health Dev* 2013;39(5):743-9. doi:  
8 496 10.1111/cch.12005 [published Online First: 2012/09/14]  
9 497 30. Cutillo A, Zimmerman K, Davies S, et al. Coping strategies used by caregivers of  
10 498 children with newly diagnosed brain tumors. *J Neurosurg Pediatr* 2018;23(1):30-  
11 499 39. doi: 10.3171/2018.7.Peds18296 [published Online First: 2018/11/30]  
12 500 31. Schmer C, Ward-Smith P, Latham S, et al. When a family member has a malignant  
13 501 brain tumor: the caregiver perspective. *J Neurosci Nurs* 2008;40(2):78-84. doi:  
14 502 10.1097/01376517-200804000-00006 [published Online First: 2008/05/17]  
15 503 32. Tastan S, Kose G, Iyigun E, et al. Experiences of the relatives of patients undergoing  
16 504 cranial surgery for a brain tumor: a descriptive qualitative study. *J Neurosci Nurs*  
17 505 2011;43(2):77-84. doi: 10.1097/jnn.0b013e31820c94da [published Online First:  
18 506 2011/04/15]  
19 507 33. Zelcer S, Cataudella D, Cairney AE, et al. Palliative care of children with brain tumors:  
20 508 a parental perspective. *Arch Pediatr Adolesc Med* 2010;164(3):225-30. doi:  
21 509 10.1001/archpediatrics.2009.284 [published Online First: 2010/03/03]  
22 510 34. Lou HL, Mu PF, Wong TT, et al. A Retrospective Study of Mothers' Perspectives of  
23 511 the Lived Experience of Anticipatory Loss of a Child From a Terminal Brain  
24 512 Tumor. *Cancer Nurs* 2015;38(4):298-304. doi: 10.1097/ncc.000000000000178  
25 513 [published Online First: 2014/07/11]  
26 514 35. Ownsworth T, Goadby E, Chambers SK. Support after brain tumor means different  
27 515 things: family caregivers' experiences of support and relationship changes. *Front*  
28 516 *Oncol* 2015;5:33. doi: 10.3389/fonc.2015.00033 [published Online First:  
29 517 2015/03/03]  
30 518 36. Hricik A, Donovan H, Bradley SE, et al. Changes in caregiver perceptions over time in  
31 519 response to providing care for a loved one with a primary malignant brain tumor.  
32 520 *Oncol Nurs Forum* 2011;38(2):149-55. doi: 10.1188/11.Onf.149-155 [published  
33 521 Online First: 2011/03/02]  
34 522 37. Lipsman N, Skanda A, Kimmelman J, et al. The attitudes of brain cancer patients and  
35 523 their caregivers towards death and dying: a qualitative study. *BMC Palliat Care*  
36 524 2007;6:7. doi: 10.1186/1472-684x-6-7 [published Online First: 2007/11/13]  
37 525 38. Lazarus RS. Stress og følelser: en syntese. København: Akademisk Forlag 2006.  
38 526 39. Lin IF, Fee HR, Wu HS. NEGATIVE AND POSITIVE CAREGIVING  
39 527 EXPERIENCES: A CLOSER LOOK AT THE INTERSECTION OF GENDER  
40 528 AND RELATIOSHIPS. *Fam Relat* 2012;61(2):343-58. doi: 10.1111/j.1741-  
41 529 3729.2011.00692.x [published Online First: 2012/05/01]  
42 530 40. Daniela Doulavince A, Altamira Pereira da Silva R, Regina Aparecida Garcia de L, et  
43 531 al. Conceptions of care and feelings of the caregiver of children with  
44 532 cancer/Concepções de cuidado e sentimentos do cuidador de crianças com câncer.  
45 533 *Acta paulista de enfermagem* 2013;26(6):542.  
46 534 41. Nicklin E, Velikova G, Hulme C, et al. Long-term issues and supportive care needs of  
47 535 adolescent and young adult childhood brain tumour survivors and their caregivers:  
48 536 A systematic review. *Psychooncology* 2019;28(3):477-87. doi: 10.1002/pon.4989  
49 537 [published Online First: 2019/01/19]

- 1  
2  
3 538 42. Sterckx W, Coolbrandt A, Dierckx de Casterlé B, et al. The impact of a high-grade  
4 539 glioma on everyday life: a systematic review from the patient's and caregiver's  
5 540 perspective. *Eur J Oncol Nurs* 2013;17(1):107-17. doi: 10.1016/j.ejon.2012.04.006  
6 541 [published Online First: 2012/06/05]  
7  
8 542 43. Holtslander LF, Duggleby W, Williams AM, et al. The experience of hope for informal  
9 543 caregivers of palliative patients. *J Palliat Care* 2005;21(4):285-91. [published  
10 544 Online First: 2006/02/18]  
11 545 44. Leite A, Garcia-Vivar C, Neris RR, et al. The experience of hope in families of  
12 546 children and adolescents living with chronic illness: A thematic synthesis of  
13 547 qualitative studies. *J Adv Nurs* 2019;75(12):3246-62. doi: 10.1111/jan.14129  
14 548 [published Online First: 2019/06/27]  
15 549 45. Lina Mahayati S, Allenidekania, Happy H. Spirituality in adolescents with cancer.  
16 550 *Enferm Clin* 2018;28 Suppl 1:31-35. doi: 10.1016/s1130-8621(18)30032-9  
17 551 [published Online First: 2018/04/14]  
18 552 46. Alidina K, Tettero I. Exploring the therapeutic value of hope in palliative nursing.  
19 553 *Palliat Support Care* 2010;8(3):353-8. doi: 10.1017/s1478951510000155  
20 554 [published Online First: 2010/09/30]  
21 555 47. Wang SC, Wu LM, Yang YM, et al. The experience of parents living with a child with  
22 556 cancer at the end of life. *Eur J Cancer Care (Engl)* 2019;28(4):e13061. doi:  
23 557 10.1111/ecc.13061 [published Online First: 2019/04/25]  
24 558 48. Hisamatsu M, & Niwa, S. . Support factors of coping with anxiety in families of  
25 559 patients with terminal cancer. *Journal of Japan Academy of Nursing Science*  
26 560 2011;31(1):58-67. doi: 10.5630/jans.31.1\_58  
27 561 49. Aromataris EM, Z (Eds.). Joanna Briggs Institute Reviewer's Manual 2017 [Available  
28 562 from:  
29 563 <https://wiki.joannabriggs.org/display/MANUAL/JBI+Reviewer%27s+Manual>  
30 564 50. Salander P. Brain tumor as a threat to life and personality: The spouse's perspective.  
31 565 *Journal of Psychosocial Oncology* 1996;14(3):1-18.  
32  
33  
34  
35  
36 566  
37  
38  
39  
40  
41  
42  
43  
44  
45  
46  
47  
48  
49  
50  
51  
52  
53  
54  
55  
56  
57  
58  
59  
60

**Table 1: Critical appraisal of the included studies.**

| Criterion<br>Y = yes<br>N = no<br>C = can't tell<br>V = valuable<br>NV = not valuable | 1. Was there a clear statement of the aims? | 2. Is a qualitative methodology appropriate? | 3. Was the research design appropriate? | 4. Was the recruitment strategy appropriate? | 5. Were the data collected in a way that addressed the research issue? | 6. Has the relationship between researcher and participants been adequately considered? | 7. Have ethical issues been taken into consideration? | 8. Was the data analysis sufficiently rigorous? | 9. Is there a clear statement of findings? | 10. How valuable is the research? | Impact factor |
|---------------------------------------------------------------------------------------|---------------------------------------------|----------------------------------------------|-----------------------------------------|----------------------------------------------|------------------------------------------------------------------------|-----------------------------------------------------------------------------------------|-------------------------------------------------------|-------------------------------------------------|--------------------------------------------|-----------------------------------|---------------|
| Arber et al. (2010) <sup>2</sup>                                                      | Y                                           | Y                                            | C                                       | C                                            | Y                                                                      | N                                                                                       | Y                                                     | C                                               | Y                                          | V                                 | Not found     |
| Arber et al. (2013) <sup>24</sup>                                                     | Y                                           | Y                                            | Y                                       | Y                                            | Y                                                                      | N                                                                                       | Y                                                     | Y                                               | Y                                          | V                                 | 1.697         |
| Coolbrant et al. (2015) <sup>23</sup>                                                 | Y                                           | Y                                            | Y                                       | Y                                            | Y                                                                      | C                                                                                       | Y                                                     | Y                                               | Y                                          | V                                 | 2.022         |
| Cuttilo et al. (2018) <sup>30</sup>                                                   | Y                                           | Y                                            | Y                                       | Y                                            | Y                                                                      | Y                                                                                       | N                                                     | Y                                               | C                                          | V                                 | 2.170         |
| Edvardsson & Ahlström (2008) <sup>25</sup>                                            | Y                                           | Y                                            | Y                                       | Y                                            | Y                                                                      | N                                                                                       | N                                                     | Y                                               | Y                                          | V                                 | 3.470         |
| Janda et al. (2006) <sup>22</sup>                                                     | Y                                           | Y                                            | Y                                       | Y                                            | Y                                                                      | N                                                                                       | Y                                                     | Y                                               | Y                                          | V                                 | 2.754         |
| Huang et al. (2021) <sup>27</sup>                                                     | Y                                           | Y                                            | Y                                       | Y                                            | Y                                                                      | N                                                                                       | Y                                                     | Y                                               | Y                                          | V                                 | 2.592         |
| Lipsman et al. (2007) <sup>37</sup>                                                   | Y                                           | Y                                            | Y                                       | Y                                            | Y                                                                      | N                                                                                       | Y                                                     | Y                                               | Y                                          | V                                 | 2.922         |
| Lou et al. (2015) <sup>34</sup>                                                       | C                                           | Y                                            | Y                                       | C                                            | Y                                                                      | N                                                                                       | N                                                     | C                                               | Y                                          | V                                 | 2.022         |
| Owensworth et al. (2015) <sup>35</sup>                                                | Y                                           | Y                                            | Y                                       | Y                                            | Y                                                                      | C                                                                                       | C                                                     | Y                                               | Y                                          | V                                 | 4.137         |
| Piil et al. (2015) <sup>21</sup>                                                      | Y                                           | Y                                            | Y                                       | Y                                            | Y                                                                      | C                                                                                       | Y                                                     | Y                                               | Y                                          | V                                 | 1.096         |
| Russel et al. (2016) <sup>10</sup>                                                    | Y                                           | Y                                            | Y                                       | Y                                            | Y                                                                      | N                                                                                       | Y                                                     | Y                                               | Y                                          | V                                 | 1.197         |
| Schmer et al. (2008) <sup>31</sup>                                                    | Y                                           | Y                                            | N                                       | Y                                            | N                                                                      | N                                                                                       | Y                                                     | N                                               | Y                                          | V                                 | 1.096         |

1  
2  
3  
4  
5  
6  
7  
8  
9  
10  
11  
12  
13  
14  
15  
16  
17  
18  
19  
20  
21  
22  
23  
24  
25  
26  
27  
28  
29  
30  
31  
32  
33  
34  
35  
36  
37  
38  
39  
40  
41  
42  
43  
44  
45  
46

|                                      |   |   |   |   |   |   |   |   |   |   |       |
|--------------------------------------|---|---|---|---|---|---|---|---|---|---|-------|
| Schubart et al. (2008) <sup>20</sup> | C | Y | Y | Y | Y | N | N | Y | Y | V | 3.470 |
| Sherwood et al. (2011) <sup>36</sup> | Y | Y | Y | Y | C | Y | N | Y | N | V | 1.438 |
| Shortman et al. (2013)               | Y | Y | Y | C | C | N | Y | N | Y | V | 1.918 |
| Strang & Strang (2001) <sup>28</sup> | C | C | Y | N | Y | N | Y | Y | Y | V | 4.956 |
| Tastan et al. (2011) <sup>32</sup>   | Y | Y | N | Y | Y | N | Y | N | Y | V | 1.096 |
| Wideheim et al. (2002) <sup>26</sup> | Y | Y | Y | Y | Y | N | C | Y | Y | V | 2.022 |
| Zelcer et al. (2010) <sup>33</sup>   | Y | Y | Y | Y | Y | N | C | Y | Y | V | 5.731 |

For peer review only

**Table 2: Thematic overview showing the studies' contribution to the different themes and subthemes.**

| Author                                    | <i>Coping factors within the next of kin and as a support system</i> |                                   |                         |                   | <i>Coping strategies – control and proactivity</i> |             |            |
|-------------------------------------------|----------------------------------------------------------------------|-----------------------------------|-------------------------|-------------------|----------------------------------------------------|-------------|------------|
|                                           | Personal characteristics                                             | Perceiving the role as meaningful | Having a support system | Hope and religion | Regain control                                     | Proactivity | Acceptance |
| Arber et al. (2010) <sup>2</sup>          |                                                                      |                                   | V                       | V                 |                                                    |             |            |
| Arber et al. (2013) <sup>24</sup>         |                                                                      |                                   | V                       |                   |                                                    |             |            |
| Coolbrandt et al. (2015) <sup>23</sup>    |                                                                      | V                                 | V                       | V                 | V                                                  |             |            |
| Cuttillo et al. (2018) <sup>30</sup>      |                                                                      |                                   | V                       | V                 | V                                                  |             | V          |
| Edvardson & Ahlström (2008) <sup>25</sup> | V                                                                    | V                                 | V                       | V                 | V                                                  | V           |            |
| Janda et al. (2006) <sup>22</sup>         |                                                                      |                                   | V                       | V                 | V                                                  |             |            |
| Huang et al. (2021) <sup>27</sup>         |                                                                      |                                   | V                       | V                 | V                                                  |             |            |
| Lipsman et al. (2007) <sup>37</sup>       | V                                                                    |                                   |                         | V                 | V                                                  |             |            |
| Lou et al. (2015) <sup>34</sup>           |                                                                      |                                   | V                       | V                 | V                                                  | V           | V          |
| Owensworth et al. (2015) <sup>35</sup>    |                                                                      | V                                 | V                       |                   | V                                                  |             |            |
| Piil et al. (2015) <sup>21</sup>          |                                                                      | V                                 | V                       | V                 | V                                                  | V           |            |
| Russell et al. (2016) <sup>10</sup>       |                                                                      |                                   | V                       | V                 | V                                                  | V           | V          |
| Schmer et al. (2008) <sup>31</sup>        |                                                                      | V                                 | V                       |                   |                                                    |             | V          |
| Schubart et al. (2008) <sup>20</sup>      |                                                                      | V                                 | V                       | V                 | V                                                  |             |            |
| Sherwood et al. (2011) <sup>36</sup>      |                                                                      |                                   | V                       |                   | V                                                  |             | V          |

1  
2  
3  
4  
5  
6  
7  
8  
9  
10  
11  
12  
13  
14  
15  
16  
17  
18  
19  
20  
21  
22  
23  
24  
25  
26  
27  
28  
29  
30  
31  
32  
33  
34  
35  
36  
37  
38  
39  
40  
41  
42  
43  
44  
45  
46

|                                      |   |   |   |   |   |   |   |
|--------------------------------------|---|---|---|---|---|---|---|
| Shortman et al. (2013) <sup>36</sup> | V | V | V |   | V |   |   |
| Strang & Strang (2001) <sup>28</sup> |   | V | V |   |   |   | V |
| Tastan et al. (2011) <sup>32</sup>   |   |   | V |   | V |   |   |
|                                      |   |   |   |   |   |   |   |
| Wideheim et al. (2002) <sup>26</sup> |   |   | V | V |   | V | V |
| Zelcer et al. (2010) <sup>33</sup>   |   |   | V | V | V |   | V |

For peer review only



1  
2  
3 Figure legend: Figure 1. Flow chart of the inclusion process  
4  
5  
6  
7  
8  
9  
10  
11  
12  
13  
14  
15  
16  
17  
18  
19  
20  
21  
22  
23  
24  
25  
26  
27  
28  
29  
30  
31  
32  
33  
34  
35  
36  
37  
38  
39  
40  
41  
42  
43  
44  
45  
46  
47  
48  
49  
50  
51  
52  
53  
54  
55  
56  
57  
58  
59  
60

For peer review only



## PRISMA 2009 Flow Diagram

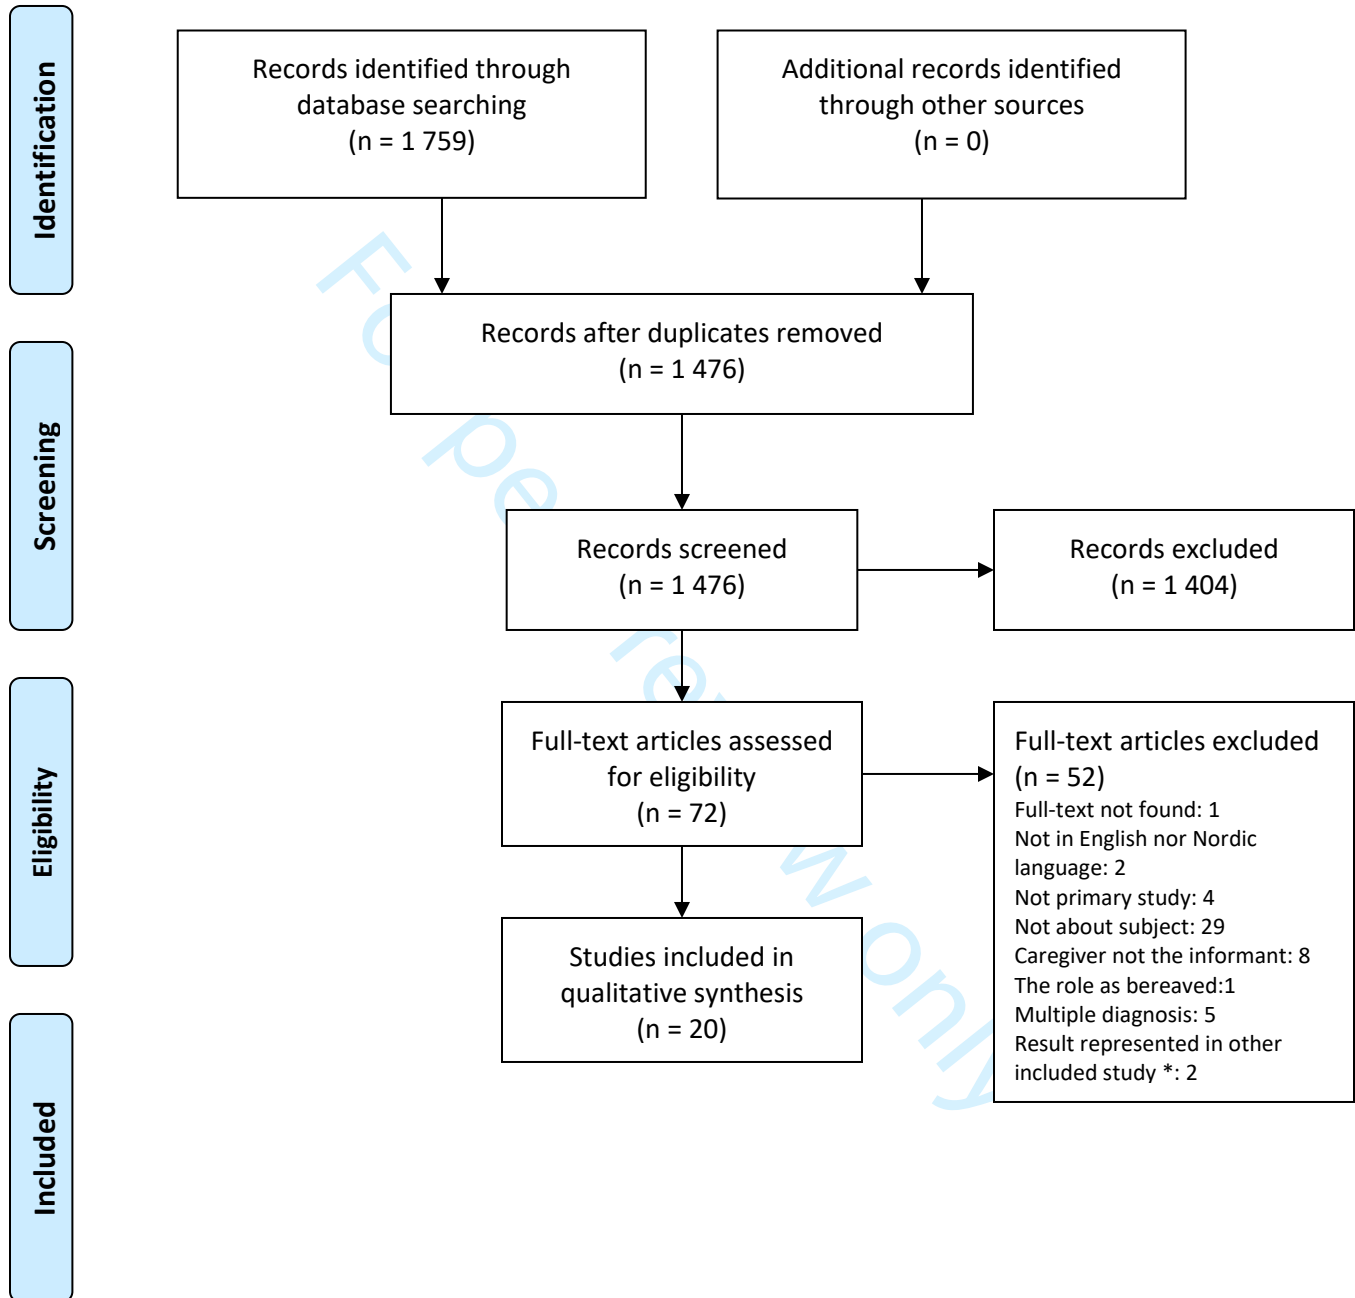

Figure 1. Flow chart of the inclusion process

From: Moher D, Liberati A, Tetzlaff J, Altman DG, The PRISMA Group (2009). Preferred Reporting Items for Systematic Reviews and Meta-Analyses: The PRISMA Statement. PLoS Med 6(7): e1000097. doi:10.1371/journal.pmed1000097

For more information, visit [www.prisma-statement.org](http://www.prisma-statement.org).

For peer review only - <http://bmjopen.bmj.com/site/about/guidelines.xhtml>

The search strategy for the metasynthesis:

To search the PsycINFO database, we used the following terms: *((qualitative adj2 (research\* or design\* or stud\* or method\*)) or hermeneutic\* or “grounded theory” or “meta synthes\*” or metasynthesis\* or metaethnograph\* or interview\* or phenomenolog\* or thematic or themes or experience\*).ti,ab,hw,id. or exp qualitative methods or phenomenology AND (caregiver\* or famil\* or next of kin\* or relatives or spous\* or wife or husband\* or sibling\* or sister\* or brother\* or dependent\* or loved one\* or parent\* or mother\* or father\* or carer\* or care giver\*).ti,ab,hw,id. AND glioma\*.ti,ab,hw,id. OR (brain adj2 (cancer or neoplasm\* or tumor\*).ti,ab,hw,id.*

In Medline and CHINAL, we used the following terms: *caregiver\* OR famil\* OR “next of kin\*” OR relatives OR spous\* OR wife OR husband\* OR sibling\* OR brother\* OR sister\* OR dependent\* OR “loved one\*” OR parent\* OR mother\* OR father\* OR carer\* OR “care giver\*” AND (MH “Qualitative Studies+”) OR (MH “Qualitative Research+”) OR (MH “Grounded Theory”) OR Interview\* OR experienc\* OR phenomenolog\* OR (qualitative WI (research\* OR method\* OR design\* OR stud\*)) OR themes OR thematic OR “audio recording” OR audiorecording OR metasynthes\* OR “meta synthes\*” OR metaetnograph\* AND (MH “Glioma+”) OR glioma OR gliomas OR glioblastom\* OR brain WI (cancer OR tumor\* or neoplasm\*).*

1  
2  
3  
4 **Supplementary materials 2: Characteristics of the included studies.**  
5

6  
7  
8  
9  
10  
11  
12  
13  
14  
15  
16  
17  
18  
19  
20  
21  
22  
23  
24  
25  
26  
27  
28  
29  
30  
31  
32  
33  
34  
35  
36  
37  
38  
39  
40  
41  
42  
43  
44  
45  
46

| Author/year/country                                        | Focus                                                                                      | Type of brain tumor and stage of treatment at interview                                    | Recruitment                                         | Participants, sex, and relationship                               | Method/design               | Data collection/analysis                                                                         |
|------------------------------------------------------------|--------------------------------------------------------------------------------------------|--------------------------------------------------------------------------------------------|-----------------------------------------------------|-------------------------------------------------------------------|-----------------------------|--------------------------------------------------------------------------------------------------|
| Arber et al. (2010). <sup>2</sup><br>United Kingdom (UK).  | Caregivers' need for information.                                                          | Malignant *<br>Stage of treatment not described.                                           | Specialist hospital in England.                     | N = 22<br>M: 7 and F: 15<br>17 spouses<br>3 children<br>2 parents | Grounded theory.            | Semistructured interview/comparative method for generating categories and topics.                |
| Arber et al. (2013). <sup>24</sup><br>United Kingdom (UK). | Caregivers' need for support.                                                              | Malignant *<br>Stage of treatment not described.                                           | Recruited by a nurse at a cancer center in England. | N = 22<br>M: 7 and F: 15<br>17 spouses<br>3 children<br>2 parents | Grounded theory.            | Semistructured interview/comparative method for generating categories and topics.                |
| Coolbrandt et al. (2015). <sup>23</sup> Belgium.           | Caregivers' experience and need for support.                                               | High-grade *<br>Radiation or chemotherapy, or in the follow-up phase after such treatment. | University Hospital in Leuven.                      | N = 16<br>M: 6 and F: 10<br>13 partners<br>2 parents<br>1 friend  | Grounded theory.            | Semistructured interview/thematic analysis inspired by the Qualitative Analysis Guide of Leuven. |
| Cuttillo et al. (2018). <sup>30</sup><br>USA.              | Which strategies caregivers of children with a brain tumor use in the postoperative phase. | 15 benign.<br>25 malignant.<br>Newly diagnosed and newly operated.                         | Pediatric hospital in the USA.                      | N = 22<br>M: 3 and F: 19<br>All parents                           | Triangulating mixed-method. | Semistructured interview/thematic analysis.                                                      |

|                                                                                        |                                                     |                                                                                                          |                                                                                                                                              |                                                                  |                                                                                                                           |                   |                                                                                                                                            |
|----------------------------------------------------------------------------------------|-----------------------------------------------------|----------------------------------------------------------------------------------------------------------|----------------------------------------------------------------------------------------------------------------------------------------------|------------------------------------------------------------------|---------------------------------------------------------------------------------------------------------------------------|-------------------|--------------------------------------------------------------------------------------------------------------------------------------------|
| 1<br>2<br>3<br>4<br>5<br>6<br>7<br>8<br>9<br>10<br>11<br>12<br>13<br>14                | Edvardson & Ahlström (2008) <sup>25</sup> . Sweden. | Caregivers' experience.                                                                                  | 25 low-grade.<br>2 high-grade.<br>Stage of treatment not described.                                                                          | The patients had participated in an earlier study.               | N = 28<br>M: 8 and F: 20<br>15 partners, living together<br>3 partners, living apart<br>8 parents<br>1 sibling<br>1 child | Not described.    | Semistructured interview/qualitative content analysis and quantitative analysis of how the topics were distributed among the participants. |
| 15<br>16<br>17<br>18<br>19<br>20<br>21<br>22<br>23<br>24                               | Janda et al. (2006) <sup>22</sup> . Australia.      | The need of support for brain tumor patients and their caregivers.                                       | Different types *<br>Treatment phase not described, but time since diagnosis stated:<br>1–2 years: 22<br>5 years: 5<br>More than 5 years: 11 | Members of Queensland Cancer Fund's Brain Tumor Support Service. | N = 10 in focus group, n = 8 in semistructured interview<br>M: 4 and F: 18<br>13 partners<br>5 children                   | Qualitative.      | Focus group interview and semistructured interview/framework analysis.                                                                     |
| 25<br>26<br>27<br>28<br>29<br>30<br>31                                                 | Lipsman et al. (2007) <sup>37</sup> . Canada.       | The experience of brain tumor patients and their caregivers, and how it affects the choice of treatment. | Malignant *<br>Palliative phase.                                                                                                             | Recruited by a neurosurgeon.                                     | N = 22<br>Further participant information not described                                                                   | Qualitative.      | Semistructured interview/thematic analysis.                                                                                                |
| 32<br>33<br>34<br>35<br>36<br>37<br>38<br>39<br>40<br>41<br>42<br>43<br>44<br>45<br>46 | Lou et al. (2015) <sup>34</sup> . Taiwan.           | The experience and suffering of mothers waiting for their child to die from brain tumor.                 | Malignant *<br>All patients deceased.                                                                                                        | Not described.                                                   | N = 10<br>F: 10<br>All mothers                                                                                            | Phenomenological. | In-depth interview/Colaizzi's analysis method.                                                                                             |

|                                                   |                                                                                                        |                                                                                                                                                                                            |                                        |                                                                                        |                               |                                                      |
|---------------------------------------------------|--------------------------------------------------------------------------------------------------------|--------------------------------------------------------------------------------------------------------------------------------------------------------------------------------------------|----------------------------------------|----------------------------------------------------------------------------------------|-------------------------------|------------------------------------------------------|
| Ownsworth et al. (2015). <sup>35</sup> Australia. | Caregivers' experience of support.                                                                     | 6 low-grade.<br>5 high-grade.<br>All underwent surgery and radiation or chemotherapy.<br>9 months – 22 years since diagnosis.                                                              | Had participated in a different study. | N = 11<br>M: 6 and F: 5<br>8 spouses<br>3 parents                                      | Phenomenological.             | Semistructured interview/thematic analysis.          |
| Piil et al. (2015). <sup>21</sup> Denmark.        | Brain tumor patients' and their caregivers' experience, and their need for rehabilitation and support. | High-grade *<br>The interviews conducted after:<br>1. Surgical diagnosis<br>2. Oncological treatment<br>3,4. Oncological treatment and scan showing treatment effect<br>5. After treatment | The University Hospital in Copenhagen. | N = 33<br>M: 10 and F: 23<br>23 spouses<br>2 girl/boyfriends<br>7 children<br>1 sister | Longitudinal and exploratory. | Semistructured interview/thematic analysis.          |
| Russell et al. (2016) <sup>10</sup> . Canada.     | The experience of children with a brain tumor and their caregivers.                                    | Malignant *<br>Diagnosed at least 3 months previously, stage of treatment not described.                                                                                                   | Hospital in Toronto.                   | N = 12<br>Based on names:<br>F: 11 stk., 1 stk. unknown<br>All parents                 | Grounded theory.              | Semistructured interview/comparative analysis.       |
| Schmer et al. (2008) <sup>31</sup> . USA.         | Caregivers' experience concerning care tasks after chemotherapy.                                       | Malignant *<br>During first 6 months of treatment.                                                                                                                                         | The patients' treatment center.        | N = 10<br>Sex unknown<br>7 spouses<br>2 daughters<br>1 son-in-law                      | Phenomenological.             | Semistructured interview/Colaizzi's analysis method. |

|                                              |                                                                                    |                                                                                                                                         |                                     |                                                                                      |                                  |                                                               |
|----------------------------------------------|------------------------------------------------------------------------------------|-----------------------------------------------------------------------------------------------------------------------------------------|-------------------------------------|--------------------------------------------------------------------------------------|----------------------------------|---------------------------------------------------------------|
| Schubart et al. (2008). <sup>20</sup> USA.   | Caregivers' challenges and unmet needs.                                            | Different types of brain cancer *<br>6 deceased<br>2 exacerbations<br>2 unstable<br>10 stable<br>1 terminal<br>3 recurrent<br>1 unclear | NeuroOncology Center.               | N = 25<br>M: 7 and F: 18<br>18 spouses<br>4 parents<br>2 children<br>1 sibling       | Grounded theory.                 | Semistructured interview/open coding and cross-case analysis. |
| Sherwood et al. (2011). <sup>36</sup> USA.   | How caregivers adapt to their new role, and how this role changes during time.     | Malignant *<br>Interviewed 1 and 4 months after diagnosis.                                                                              | A regional hospital.                | N = 10<br>M: 2 and F: 8<br>5 spouses<br>2 parents<br>1 child<br>1 nephew<br>1 friend | Longitudinal descriptive design. | Semistructured interview/thematic content analysis.           |
| Shortman et al. (2013). United Kingdom (UK). | Mothers of children with brain tumor—their experience and their coping mechanisms. | Different types and degrees *.<br>All underwent surgery, five radiation, and four chemotherapy.<br>17–35 months since diagnosis.        | Also participated in another study. | N = 6<br>F: 6<br>All mothers.                                                        | Not described.                   | Semistructured interview/thematic content analysis.           |

1  
2  
3  
4  
5  
6  
7  
8  
9  
10  
11  
12  
13  
14  
15  
16  
17  
18  
19  
20  
21  
22  
23  
24  
25  
26  
27  
28  
29  
30  
31  
32  
33  
34  
35  
36  
37  
38  
39  
40  
41  
42  
43  
44  
45  
46

|                                               |                                                                                                                             |                                                                                                                                                                                          |                                                         |                                                                                                 |                                    |                                                                                                |
|-----------------------------------------------|-----------------------------------------------------------------------------------------------------------------------------|------------------------------------------------------------------------------------------------------------------------------------------------------------------------------------------|---------------------------------------------------------|-------------------------------------------------------------------------------------------------|------------------------------------|------------------------------------------------------------------------------------------------|
| Strang & Strang (2001). <sup>28</sup> Sweden. | The degree to which patients with a brain tumor and their caregivers cope, understand, and create meaning in the situation. | Malignant tumors, grade 2–4.<br><br>Treatment stage not described.                                                                                                                       | Not described.                                          | N = 16<br><br>Further participant information not described.                                    | Hermeneutic phenomenological.      | Semistructured interview/structural analysis based on hermeneutic circle described by Ricoeur. |
| Tastan et al. (2011). <sup>32</sup> Turkey.   | Caregivers' experience of postoperative phase and homecare.                                                                 | Different types and degrees *<br><br>All patients had undergone surgery and postoperative treatment and were being treated at home.                                                      | A research and military training hospital in Turkey.    | N = 19<br><br>M: 4 and F: 6<br><br>4 spouses<br><br>4 children<br><br>1 parent<br><br>1 sibling | Descriptive qualitative study.     | Semistructured interview/Colaizzi's analysis method.                                           |
| Huang et al. (2021). <sup>27</sup> Taiwan     | The lived experience of parents having a child with a brain tumor during the shared decision-making process of treatment    | 4 medulloblastoma<br>3 germ cell tumor<br>1 glioblastoma<br>1 astrocytoma<br>1 ependymoma<br><br>The interviews were conducted between 1-6 months after the child received the diagnosis | A pediatric oncology ward at a medical center in Taiwan | N=10<br><br>M: 3 and F: 7                                                                       | Descriptive phenomenological study | Semistructured interview/Colaizzi's analysis method.                                           |
| Wideheim et al. (2002). <sup>26</sup> Sweden. | The experience of a brain tumor from a family perspective.                                                                  | High-grade glioma.<br><br>The interviews were conducted 2–3 weeks, 3 months, and 6 months postoperatively.                                                                               | Not described.                                          | N = 5<br><br>Sex unknown<br><br>2 spouses<br><br>2 parents                                      | Descriptive qualitative study.     | Qualitative interviews/inductive content analysis.                                             |



|                                             |                                                                                |                                       |                                                     |                                         |             |                                                     |
|---------------------------------------------|--------------------------------------------------------------------------------|---------------------------------------|-----------------------------------------------------|-----------------------------------------|-------------|-----------------------------------------------------|
|                                             |                                                                                |                                       |                                                     | 1 adult child                           |             |                                                     |
| Zelcer et al. (2010). <sup>33</sup> Canada. | The experience of brain tumor patients and caregivers in the palliative phase. | Malignant *<br>All patients deceased. | Children's Hospital, London Health Sciences Centre. | N = 25<br>M: 9 and F: 16<br>All parents | Qualitative | Semistructured interview/thematic content analysis. |

1 M = Male, F = Female

\*=Tumor not further described

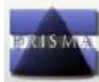

## PRISMA 2020 Checklist

| Section and Topic             | Item # | Checklist item                                                                                                                                                                                                                                                                                       | Location where item is reported |
|-------------------------------|--------|------------------------------------------------------------------------------------------------------------------------------------------------------------------------------------------------------------------------------------------------------------------------------------------------------|---------------------------------|
| <b>TITLE</b>                  |        |                                                                                                                                                                                                                                                                                                      |                                 |
| Title                         | 1      | Coping in the role as next of kin of a person with a brain tumor: a qualitative metasynthesis<br><br><i>The page number refers to the copy without track changes</i>                                                                                                                                 | Page 1, line 1-2                |
| <b>ABSTRACT</b>               |        |                                                                                                                                                                                                                                                                                                      |                                 |
| Abstract                      | 2      | See the PRISMA 2020 for Abstracts checklist.                                                                                                                                                                                                                                                         | Page 1-2, line 18-39            |
| <b>INTRODUCTION</b>           |        |                                                                                                                                                                                                                                                                                                      |                                 |
| Rationale                     | 3      | Describe the rationale for the review in the context of existing knowledge.                                                                                                                                                                                                                          | Page 4, line 78-84              |
| Objectives                    | 4      | Provide an explicit statement of the objective(s) or question(s) the review addresses.                                                                                                                                                                                                               | Page 4, line 85-87              |
| <b>METHODS</b>                |        |                                                                                                                                                                                                                                                                                                      |                                 |
| Eligibility criteria          | 5      | Specify the inclusion and exclusion criteria for the review and how studies were grouped for the syntheses.                                                                                                                                                                                          | Page 5, line 100-109            |
| Information sources           | 6      | Specify all databases, registers, websites, organisations, reference lists and other sources searched or consulted to identify studies. Specify the date when each source was last searched or consulted.                                                                                            | Page 5, line 100-102            |
| Search strategy               | 7      | Present the full search strategies for all databases, registers and websites, including any filters and limits used.                                                                                                                                                                                 | Supplementary material 1        |
| Selection process             | 8      | Specify the methods used to decide whether a study met the inclusion criteria of the review, including how many reviewers screened each record and each report retrieved, whether they worked independently, and if applicable, details of automation tools used in the process.                     | Page 6, line 111-115            |
| Data collection process       | 9      | Specify the methods used to collect data from reports, including how many reviewers collected data from each report, whether they worked independently, any processes for obtaining or confirming data from study investigators, and if applicable, details of automation tools used in the process. | Page 6, line 120-125            |
| Data items                    | 10a    | List and define all outcomes for which data were sought. Specify whether all results that were compatible with each outcome domain in each study were sought (e.g. for all measures, time points, analyses), and if not, the methods used to decide which results to collect.                        | na                              |
|                               | 10b    | List and define all other variables for which data were sought (e.g. participant and intervention characteristics, funding sources). Describe any assumptions made about any missing or unclear information.                                                                                         | na                              |
| Study risk of bias assessment | 11     | Specify the methods used to assess risk of bias in the included studies, including details of the tool(s) used, how many reviewers assessed each study and whether they worked independently, and if applicable, details of automation tools used in the process.                                    | Page 6, line 128-132            |
| Effect measures               | 12     | Specify for each outcome the effect measure(s) (e.g. risk ratio, mean difference) used in the synthesis or presentation of results.                                                                                                                                                                  | na                              |
| Synthesis methods             | 13a    | Describe the processes used to decide which studies were eligible for each synthesis (e.g. tabulating the study intervention characteristics and comparing against the planned groups for each synthesis (item #5)).                                                                                 | Table 2                         |
|                               | 13b    | Describe any methods required to prepare the data for presentation or synthesis, such as handling of missing summary statistics, or data conversions.                                                                                                                                                | Table 1 and 2                   |
|                               | 13c    | Describe any methods used to tabulate or visually display results of individual studies and syntheses.                                                                                                                                                                                               | Table 1 and 2                   |

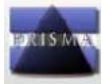

## PRISMA 2020 Checklist

| Section and Topic             | Item # | Checklist item                                                                                                                                                                                                                                                                       | Location where item is reported                    |
|-------------------------------|--------|--------------------------------------------------------------------------------------------------------------------------------------------------------------------------------------------------------------------------------------------------------------------------------------|----------------------------------------------------|
|                               | 13d    | Describe any methods used to synthesize results and provide a rationale for the choice(s). If meta-analysis was performed, describe the model(s), method(s) to identify the presence and extent of statistical heterogeneity, and software package(s) used.                          | Page 7-8                                           |
|                               | 13e    | Describe any methods used to explore possible causes of heterogeneity among study results (e.g. subgroup analysis, meta-regression).                                                                                                                                                 | na                                                 |
|                               | 13f    | Describe any sensitivity analyses conducted to assess robustness of the synthesized results.                                                                                                                                                                                         | na                                                 |
| Reporting bias assessment     | 14     | Describe any methods used to assess risk of bias due to missing results in a synthesis (arising from reporting biases).                                                                                                                                                              | na                                                 |
| Certainty assessment          | 15     | Describe any methods used to assess certainty (or confidence) in the body of evidence for an outcome.                                                                                                                                                                                | na                                                 |
| <b>RESULTS</b>                |        |                                                                                                                                                                                                                                                                                      |                                                    |
| Study selection               | 16a    | Describe the results of the search and selection process, from the number of records identified in the search to the number of studies included in the review, ideally using a flow diagram.                                                                                         | Fig 1                                              |
|                               | 16b    | Cite studies that might appear to meet the inclusion criteria, but which were excluded, and explain why they were excluded.                                                                                                                                                          | na                                                 |
| Study characteristics         | 17     | Cite each included study and present its characteristics.                                                                                                                                                                                                                            | Supplementary materials 2 and page 8, line 177-184 |
| Risk of bias in studies       | 18     | Present assessments of risk of bias for each included study.                                                                                                                                                                                                                         | na                                                 |
| Results of individual studies | 19     | For all outcomes, present, for each study: (a) summary statistics for each group (where appropriate) and (b) an effect estimate and its precision (e.g. confidence/credible interval), ideally using structured tables or plots.                                                     | na                                                 |
| Results of syntheses          | 20a    | For each synthesis, briefly summarise the characteristics and risk of bias among contributing studies.                                                                                                                                                                               | na                                                 |
|                               | 20b    | Present results of all statistical syntheses conducted. If meta-analysis was done, present for each the summary estimate and its precision (e.g. confidence/credible interval) and measures of statistical heterogeneity. If comparing groups, describe the direction of the effect. | na                                                 |
|                               | 20c    | Present results of all investigations of possible causes of heterogeneity among study results.                                                                                                                                                                                       | na                                                 |
|                               | 20d    | Present results of all sensitivity analyses conducted to assess the robustness of the synthesized results.                                                                                                                                                                           | na                                                 |
| Reporting biases              | 21     | Present assessments of risk of bias due to missing results (arising from reporting biases) for each synthesis assessed.                                                                                                                                                              | na                                                 |
| Certainty of evidence         | 22     | Present assessments of certainty (or confidence) in the body of evidence for each outcome assessed.                                                                                                                                                                                  | na                                                 |
| <b>DISCUSSION</b>             |        |                                                                                                                                                                                                                                                                                      |                                                    |
| Discussion                    | 23a    | Provide a general interpretation of the results in the context of other evidence.                                                                                                                                                                                                    | Page 15-17, line 302-353                           |
|                               | 23b    | Discuss any limitations of the evidence included in the review.                                                                                                                                                                                                                      | Page 17-18, line 353-373                           |
|                               | 23c    | Discuss any limitations of the review processes used.                                                                                                                                                                                                                                | Page 17-18, line 353-373                           |
|                               | 23d    | Discuss implications of the results for practice, policy, and future research.                                                                                                                                                                                                       | Page 18, line 376-383                              |

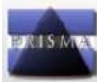

# PRISMA 2020 Checklist

1  
2  
3  
4  
5  
6  
7  
8  
9  
10  
11  
12  
13  
14  
15  
16  
17  
18  
19  
20  
21  
22  
23  
24  
25  
26  
27  
28  
29  
30  
31  
32  
33  
34  
35  
36  
37  
38  
39  
40  
41  
42  
43  
44  
45  
46  
47

| Section and Topic                              | Item # | Checklist item                                                                                                                                                                                                                             | Location where item is reported |
|------------------------------------------------|--------|--------------------------------------------------------------------------------------------------------------------------------------------------------------------------------------------------------------------------------------------|---------------------------------|
| <b>OTHER INFORMATION</b>                       |        |                                                                                                                                                                                                                                            |                                 |
| Registration and protocol                      | 24a    | Provide registration information for the review, including register name and registration number, or state that the review was not registered.                                                                                             | na                              |
|                                                | 24b    | Indicate where the review protocol can be accessed, or state that a protocol was not prepared.                                                                                                                                             | na                              |
|                                                | 24c    | Describe and explain any amendments to information provided at registration or in the protocol.                                                                                                                                            | na                              |
| Support                                        | 25     | Describe sources of financial or non-financial support for the review, and the role of the funders or sponsors in the review.                                                                                                              | na                              |
| Competing interests                            | 26     | Declare any competing interests of review authors.                                                                                                                                                                                         | na                              |
| Availability of data, code and other materials | 27     | Report which of the following are publicly available and where they can be found: template data collection forms; data extracted from included studies; data used for all analyses; analytic code; any other materials used in the review. | na                              |

From: Page MJ, McKenzie JE, Bossuyt PM, Boutron I, Hoffmann TC, Mulrow CD, et al. The PRISMA 2020 statement: an updated guideline for reporting systematic reviews. BMJ 2021;372:n71. doi: 10.1136/bmj.n71

For more information, visit: <http://www.prisma-statement.org/>
